# Supplementary material for: Synthesis and characterization of heptacoordinated molybdenum( ii ) complexes supported with 2,6-bis(pyrazol-3-yl)pyridine (bpp) ligands
Source: Royal Society of Chemistry journal article supplement (doi:10.1039/d4dt03264k), 2025-01-01
Supplement: d4dt03264k1.pdf [file d4dt03264k1.pdf]

# Supporting Information

## Synthesis and Characterization of Heptacoordinated Molybdenum(II) Complexes Supported with 2,6-Bis(pyrazol-3-yl)pyridine (bpp) Ligands

Arno Estival,<sup>a</sup> Luis E. Blancarte,<sup>b</sup> Loïc Pinto,<sup>a</sup> Romane Pointis,<sup>a</sup> Nathan Galas,<sup>a</sup> Alix Sournia-Saquet,<sup>a</sup> Laure Vendier,<sup>a</sup> Rosa Santillan,<sup>c</sup> Norberto Farfán,<sup>b</sup> Jean-Baptiste Sortais,<sup>a</sup> Mary Grellier,<sup>a</sup> Antoine Simonneau<sup>\*a</sup>

[a] LCC-CNRS, Université de Toulouse, CNRS, UPS, 205 route de Narbonne, BP44099, F-31077 Toulouse cedex 4, France.

[b] Facultad de Química, Departamento de Química Orgánica, Universidad Nacional Autónoma de México, 04510 CDMX, México

[c] Departamento de Química, Centro de Investigación y de Estudios Avanzados del IPN, México D.F. Apdo. Postal 14–740, 07000, Mexico

### Table of Contents

|                                    |           |
|------------------------------------|-----------|
| <b>1. NMR SPECTRA</b> .....        | <b>3</b>  |
| 1.1. COMPOUNDS 4A, 5A AND 6A.....  | 3         |
| 1.1.1. Complex 4a.....             | 3         |
| 1.1.2. Complex 5a.....             | 7         |
| 1.1.3. Complex 6a.....             | 10        |
| 1.2. COMPOUNDS 4B, 5B AND 6B. .... | 13        |
| 1.2.1. Complex 4b.....             | 13        |
| 1.2.2. Complex 5b.....             | 18        |
| 1.2.3. Complex 6b.....             | 22        |
| 1.3. COMPOUNDS 4C, 5C AND 6C. .... | 27        |
| 1.3.1. Complex 4c.....             | 27        |
| 1.3.2. Complex 5c.....             | 32        |
| 1.3.3. Complex 6c.....             | 35        |
| <b>2. IR SPECTRA</b> .....         | <b>40</b> |
| 2.1. COMPOUNDS 4A, 5A AND 6A.....  | 40        |
| 2.1.1. Complex 4a.....             | 40        |
| 2.1.2. Complex 5a.....             | 40        |
| 2.1.3. Complex 6a.....             | 41        |
| 2.2. SERIES 4B, 5B AND 6B.....     | 41        |
| 2.2.1. Complex 4b.....             | 41        |
| 2.2.2. Complex 5b.....             | 42        |
| 2.2.3. Complex 6b.....             | 42        |
| 2.3. COMPOUNDS 4C, 5C AND 6C. .... | 43        |
| 2.3.1. Complex 4c.....             | 43        |
| 2.3.2. Complex 5c.....             | 43        |
| 2.3.3. Complex 6c.....             | 44        |

|                                                                                                         |           |
|---------------------------------------------------------------------------------------------------------|-----------|
| <b>3. UV-VISIBLE SPECTRA.....</b>                                                                       | <b>45</b> |
| <b>4. CRYSTALLOGRAPHIC DATA.....</b>                                                                    | <b>50</b> |
| 4.1. XRD DATA FOR COMPOUND 4A .....                                                                     | 50        |
| 4.2. XRD DATA FOR COMPOUND 4B .....                                                                     | 52        |
| 4.3. XRD DATA FOR COMPOUND 5B .....                                                                     | 54        |
| 4.4. XRD DATA FOR COMPOUND 6B .....                                                                     | 55        |
| 4.5. XRD DATA FOR COMPOUND 4C .....                                                                     | 57        |
| 4.6. XRD DATA FOR COMPOUND 5C .....                                                                     | 58        |
| <b>5. ELECTROCHEMISTRY.....</b>                                                                         | <b>60</b> |
| 5.1. LIGAND L <sup>CF<sub>3</sub></sup> .....                                                           | 60        |
| 5.1.1. <i>Cyclic Voltammetry</i> .....                                                                  | 60        |
| 5.1.2. <i>Square wave Voltammetry</i> .....                                                             | 61        |
| 5.2. LIGAND L <sup>T<sup>B</sup>U</sup> .....                                                           | 62        |
| 5.2.1. <i>Cyclic voltammetry</i> .....                                                                  | 62        |
| 5.2.2. <i>Square wave voltammetry</i> .....                                                             | 62        |
| 5.3. COMPOUND 4A .....                                                                                  | 64        |
| 5.3.1. <i>Cyclic Voltammetry</i> .....                                                                  | 64        |
| 5.3.2. <i>Square wave voltammetry</i> .....                                                             | 65        |
| 5.4. COMPOUND 4B .....                                                                                  | 66        |
| 5.4.1. <i>Cyclic Voltammetry</i> .....                                                                  | 66        |
| 5.4.2. <i>Square wave voltammetry</i> .....                                                             | 67        |
| 5.5. COMPOUND 5B .....                                                                                  | 68        |
| 5.5.1. <i>Cyclic voltammetry</i> .....                                                                  | 68        |
| 5.5.2. <i>Square wave voltammetry</i> .....                                                             | 69        |
| 5.6. COMPOUND 6B .....                                                                                  | 70        |
| 5.6.1. <i>Cyclic voltammetry</i> .....                                                                  | 70        |
| 5.6.2. <i>Square wave voltammetry</i> .....                                                             | 71        |
| 5.7. TABLE S1 – COMPILATION OF REDOX POTENTIALS (V vs. SCE) DETERMINED BY CYCLIC VOLTAMMETRY. ....      | 72        |
| 5.8. TABLE S2 – COMPILATION OF REDOX POTENTIALS (V vs. SCE) DETERMINED BY SQUARE WAVE VOLTAMMETRY. .... | 72        |
| <b>6. REFERENCES.....</b>                                                                               | <b>73</b> |

# 1. NMR spectra

## 1.1. Compounds 4a, 5a and 6a

### 1.1.1. Complex 4a

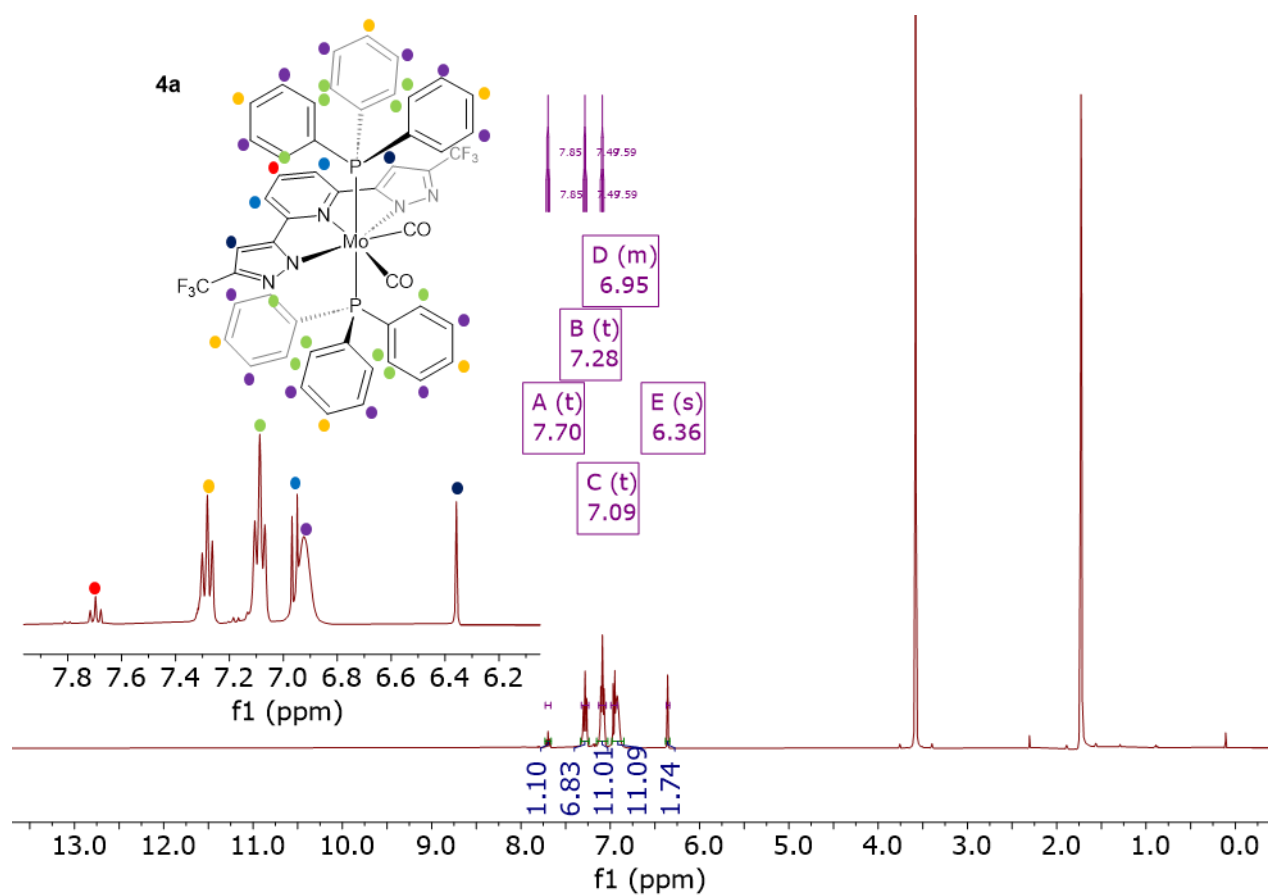

**Figure S1.** <sup>1</sup>H NMR (400 MHz, THF-*d*<sub>8</sub>) of compound **4a**: δ 7.70 (t, *J* = 7.9 Hz, 1H), 7.28 (t, *J* = 7.5 Hz, 6H), 7.09 (t, *J* = 7.6 Hz, 12H), 6.99 – 6.92 (m, 13H overlapping), 6.36 (s, 2H).

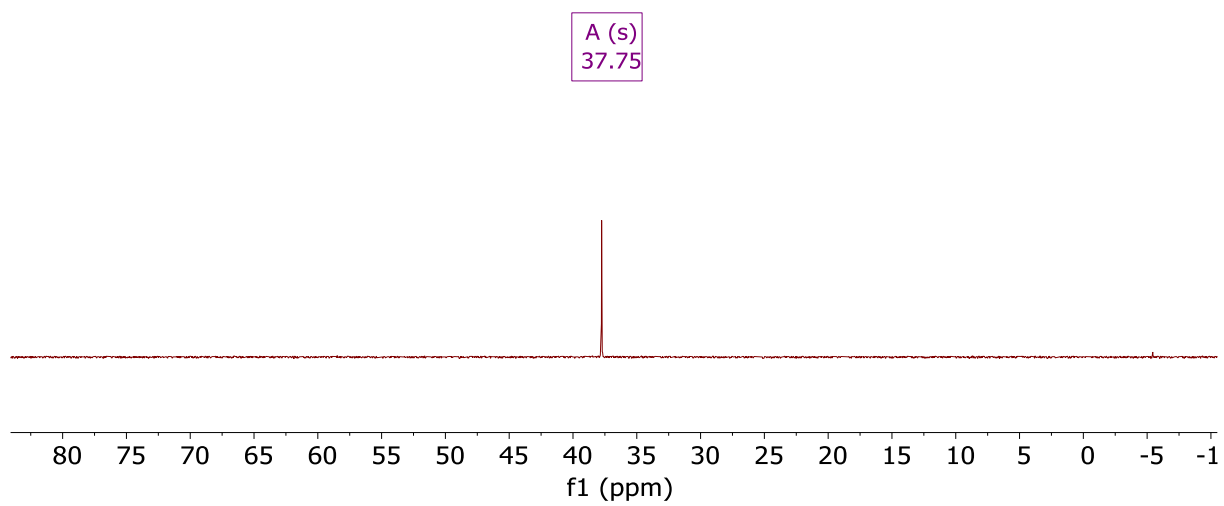

**Figure S2.**  $^{31}\text{P}\{\text{H}\}$  NMR (162 MHz,  $\text{THF-}d_8$ ) of compound **4a**:  $\delta$  37.75 (s, 2P).

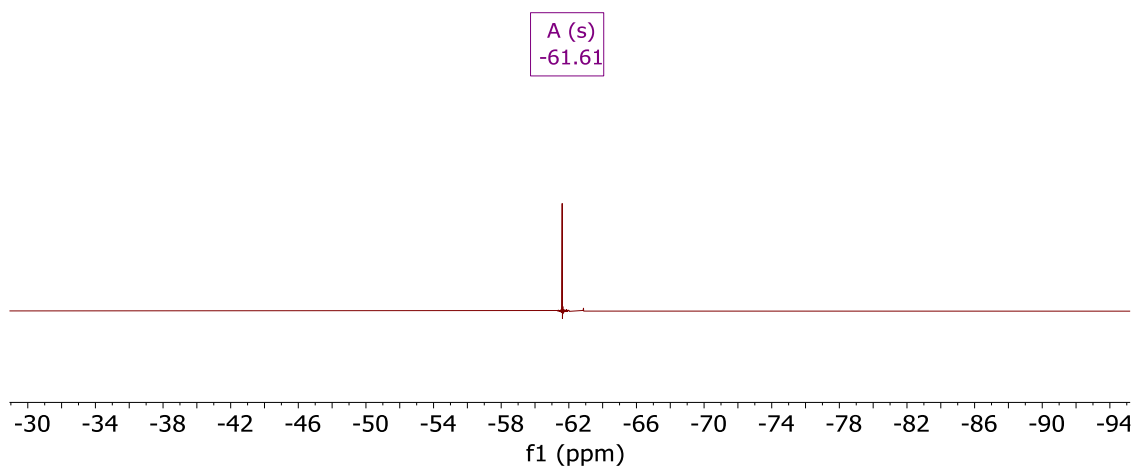

**Figure S3.**  $^{19}\text{F}$  NMR (377 MHz,  $\text{THF-}d_8$ ) of compound **4a**:  $\delta$  -61.61.

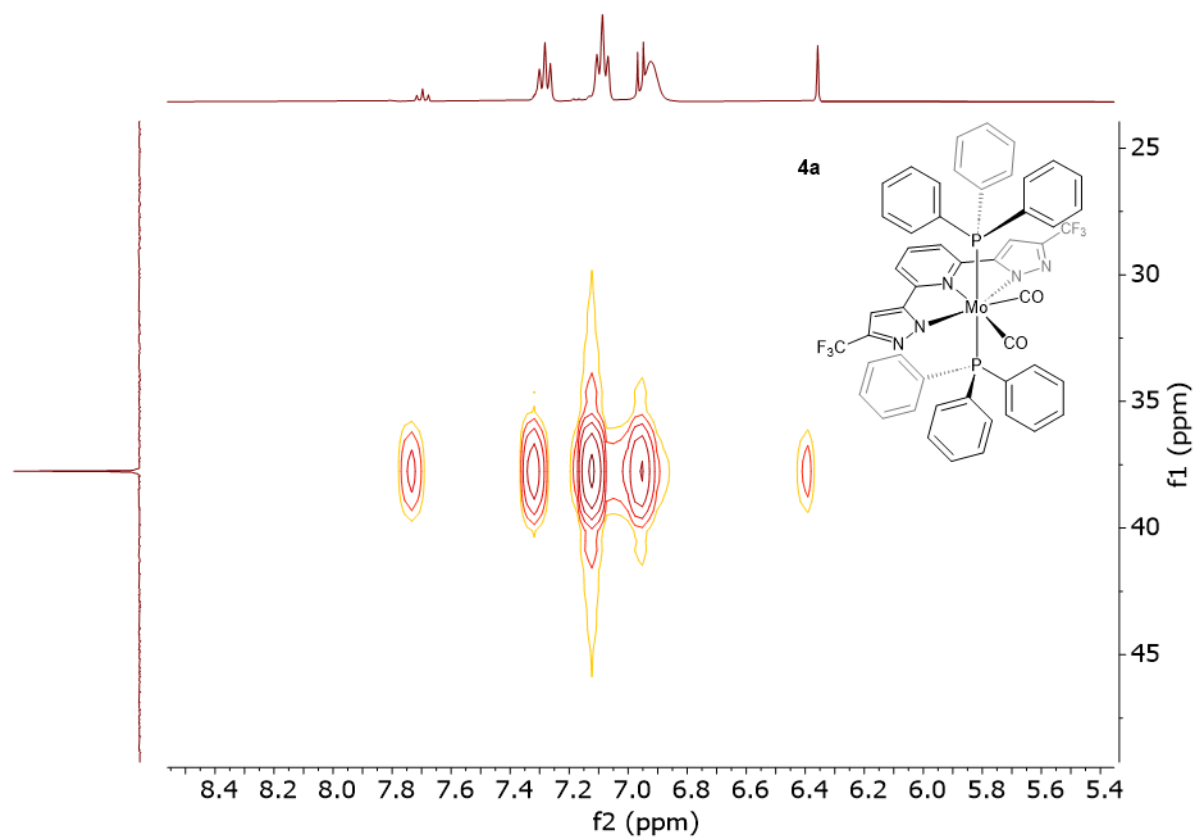

**Figure S4.** 2D NMR  $^{31}\text{P}$  HMQC (400MHz,  $\text{THF-}d_8$ ) of compound **4a**.

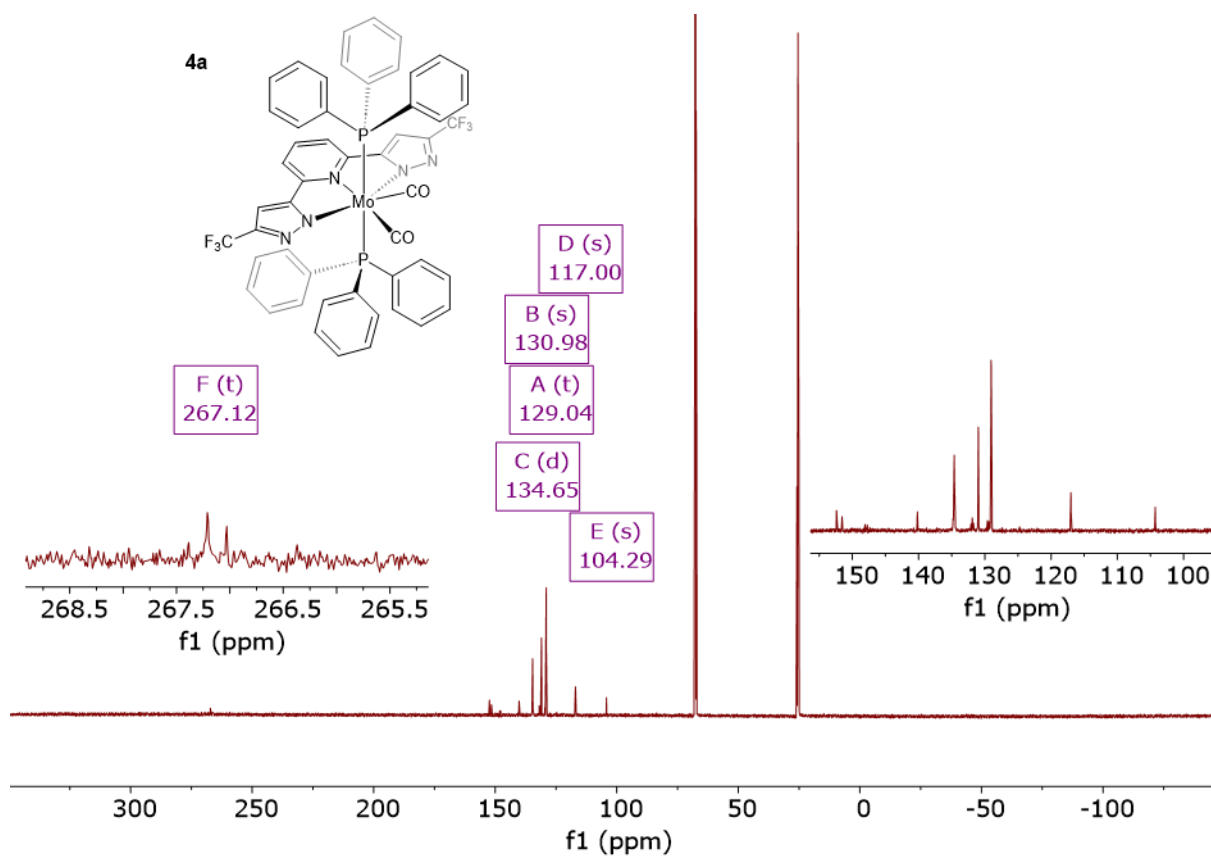

**Figure S5.**  $^{13}\text{C}\{^1\text{H}\}$  NMR (101 MHz,  $\text{THF-}d_8$ ) **4a**:  $\delta$  267.12 (t,  $J = 18.2$  Hz), 134.65 (d,  $J = 6.0$  Hz), 130.98, 129.04 (t,  $J = 4.6$  Hz), 117.00, 104.29.

### 1.1.2. Complex 5a

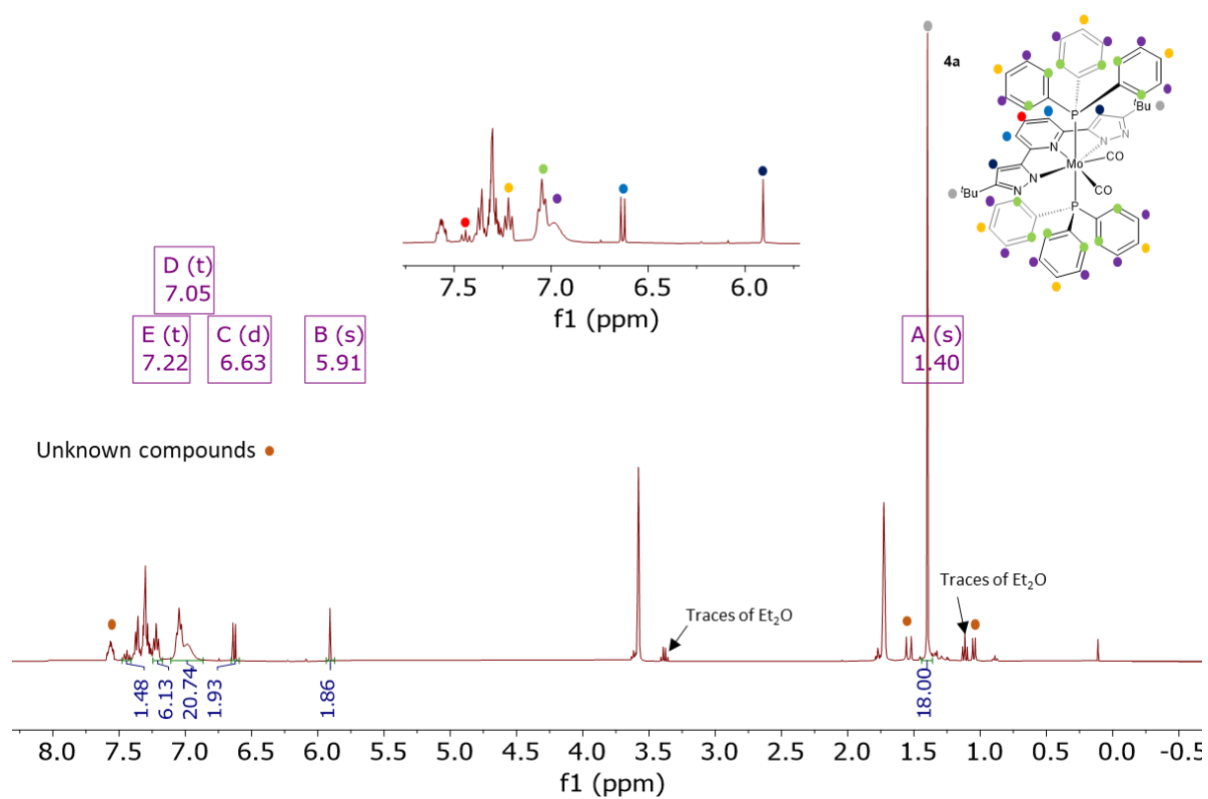

**Figure S6.**  $^1\text{H}$  NMR (400 MHz,  $\text{THF-}d_8$ ) of compound **5a**:  $\delta$  7.22 (t,  $J = 7.3$  Hz, 1H), 7.05 (t overlapping,  $J = 7.5$  Hz), 6.63 (d,  $J = 7.8$  Hz, 2H), 5.91 (s,  $J = 0.8$  Hz, 2H), 1.40 (s, 18H).

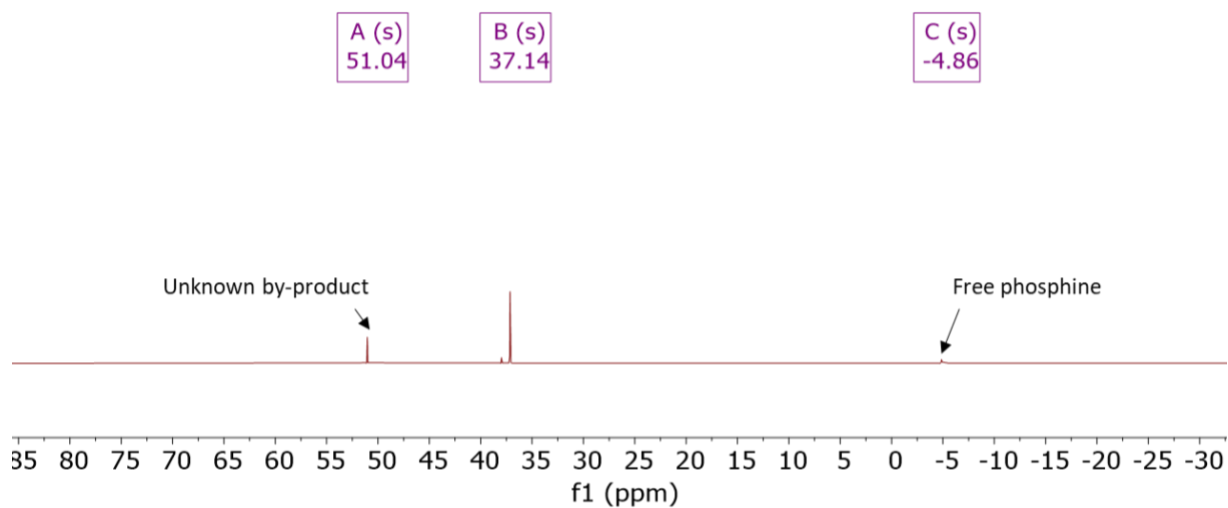

**Figure S7.**  $^{31}\text{P}\{^1\text{H}\}$  NMR (162 MHz, THF- $d_8$ ) of compound **5a**:  $\delta$  37.14 (s, 2P).

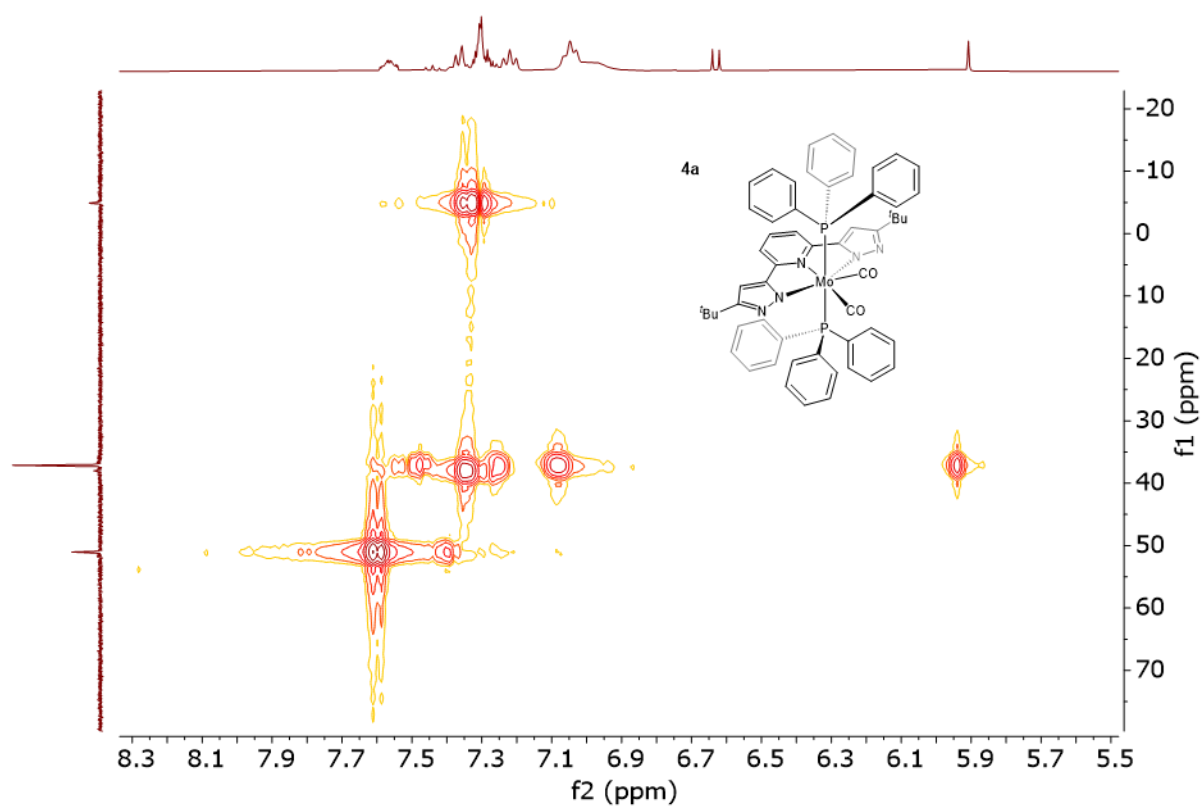

**Figure S8.** 2D NMR  $^{31}\text{P}$  HMQC (400MHz, THF- $d_8$ ) of compound **5a**.



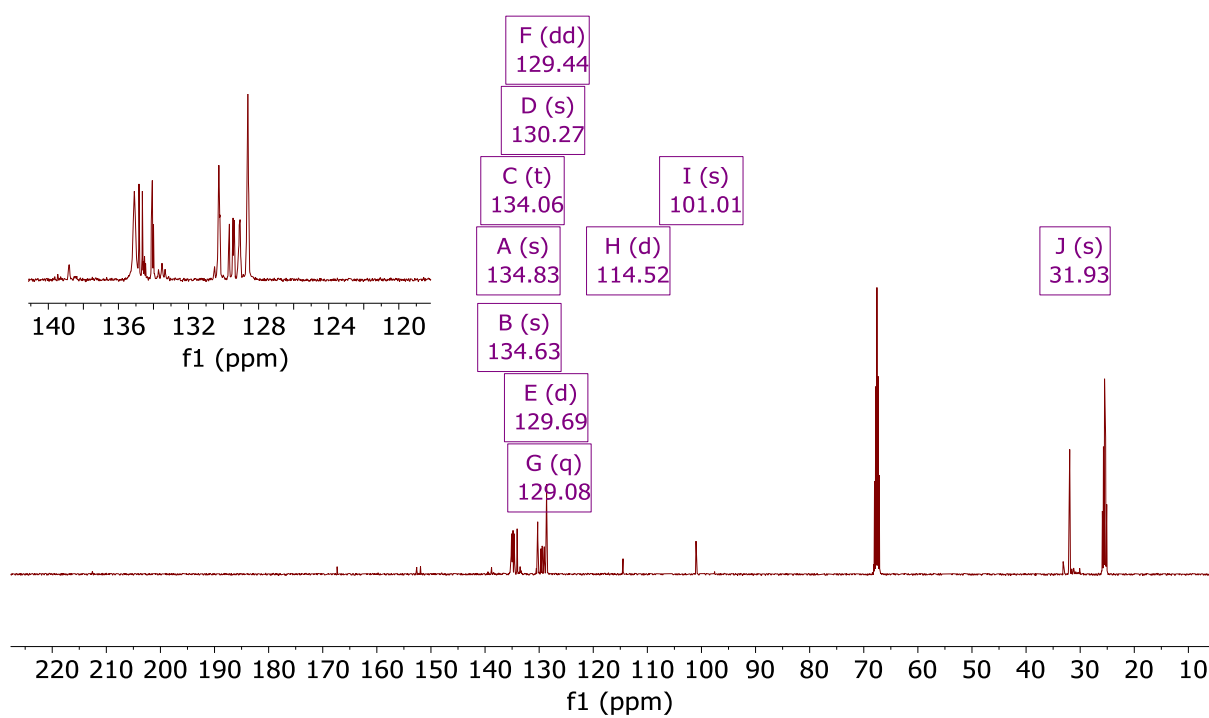

**Figure S9.**  $^{13}\text{C}\{^1\text{H}\}$  NMR (101 MHz,  $\text{THF-}d_8$ ) of compound **5a**:  $\delta$  134.83, 134.63, 134.06 (t,  $J = 6.2$  Hz), 130.27, 129.69 (d,  $J = 3.8$  Hz), 129.44 (dd,  $J = 7.2, 2.7$  Hz), 129.08 (q,  $J = 4.1$  Hz), 114.52 (d,  $J = 4.3$  Hz), 101.01, 31.93.

### 1.1.3. Complex 6a

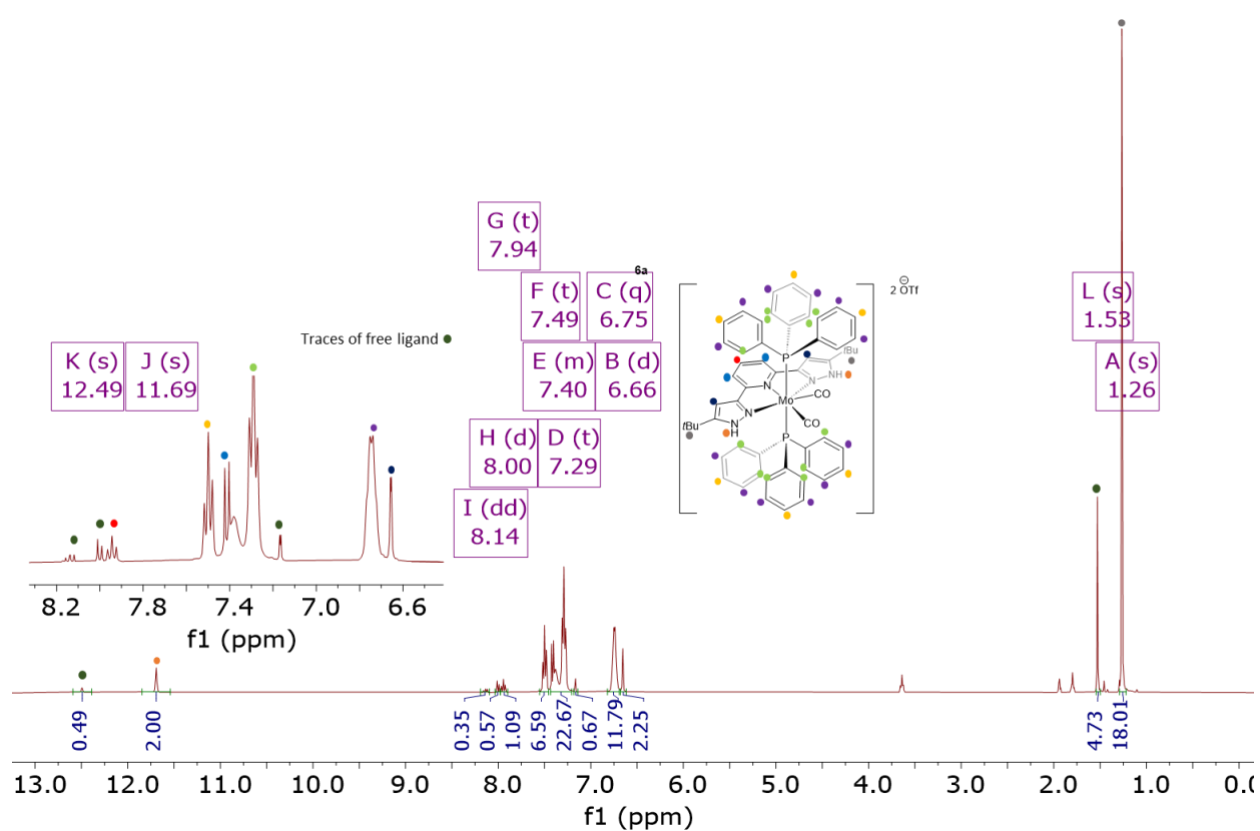

**Figure S10.**  $^1\text{H}$  NMR (400 MHz,  $\text{CD}_3\text{CN}$ ) of compound **6a**:  $\delta$  11.69 (s, 2H), 7.94 (t, 1H), 7.49 (t, 6H), 7.45 – 7.36 (m, 2H), 7.29 (t,  $J = 7.8$  Hz, 2H), 6.75 (q,  $J = 6.7, 6.3$  Hz, 12H), 1.26 (s, 18H).

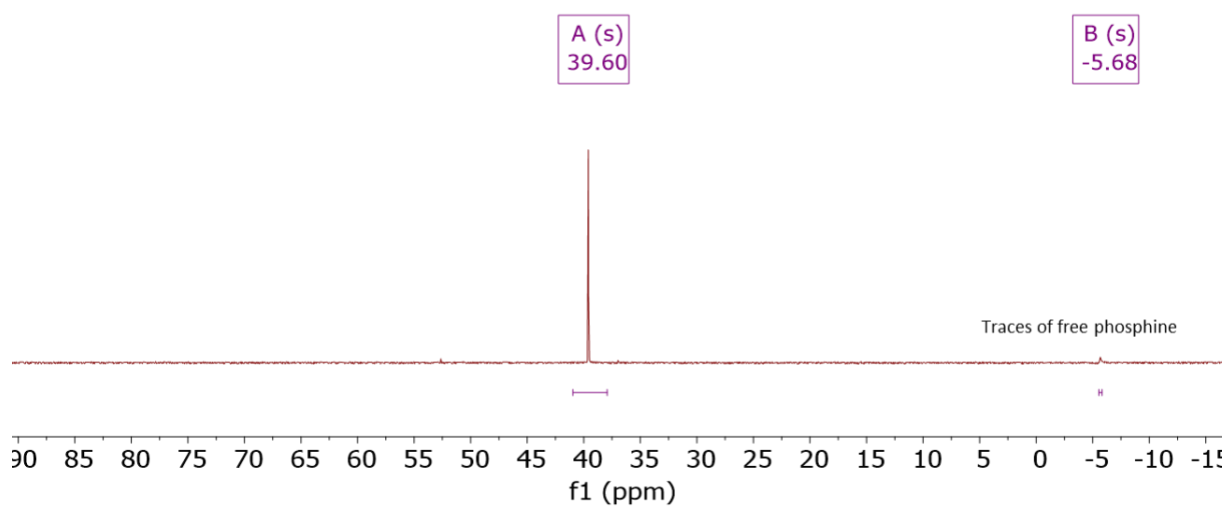

**Figure S11.**  $^{31}\text{P}\{^1\text{H}\}$  NMR of compound **6a** (162 MHz,  $\text{CD}_3\text{CN}$ )  $\delta$  39.60.

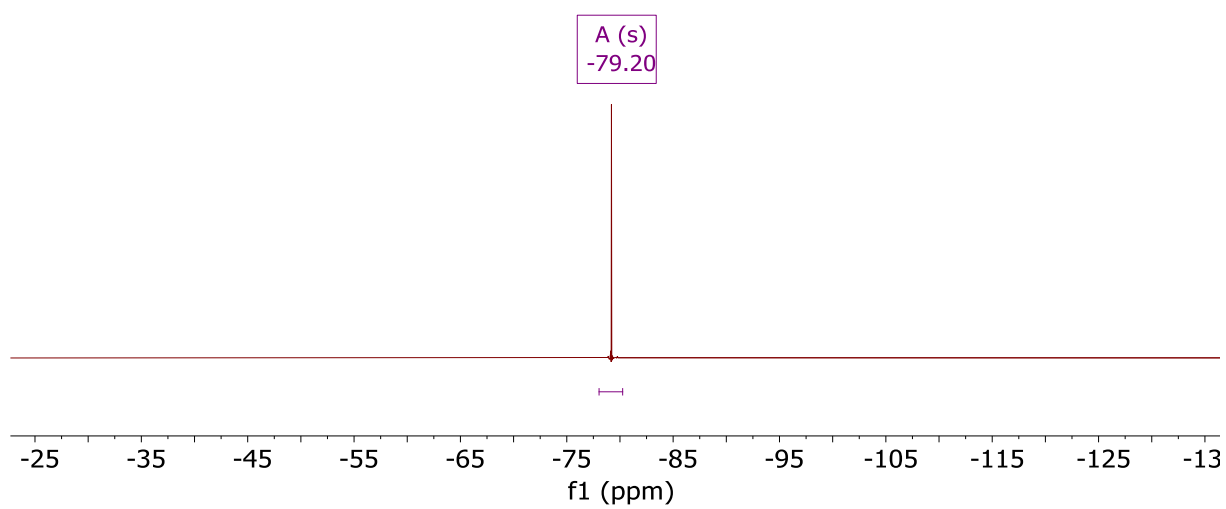

**Figure S12.**  $^{19}\text{F}$  NMR of compound **6a** (377 MHz,  $\text{CD}_3\text{CN}$ )  $\delta$  -79.20.

## 1.2. Compounds 4b, 5b and 6b.

### 1.2.1. Complex 4b

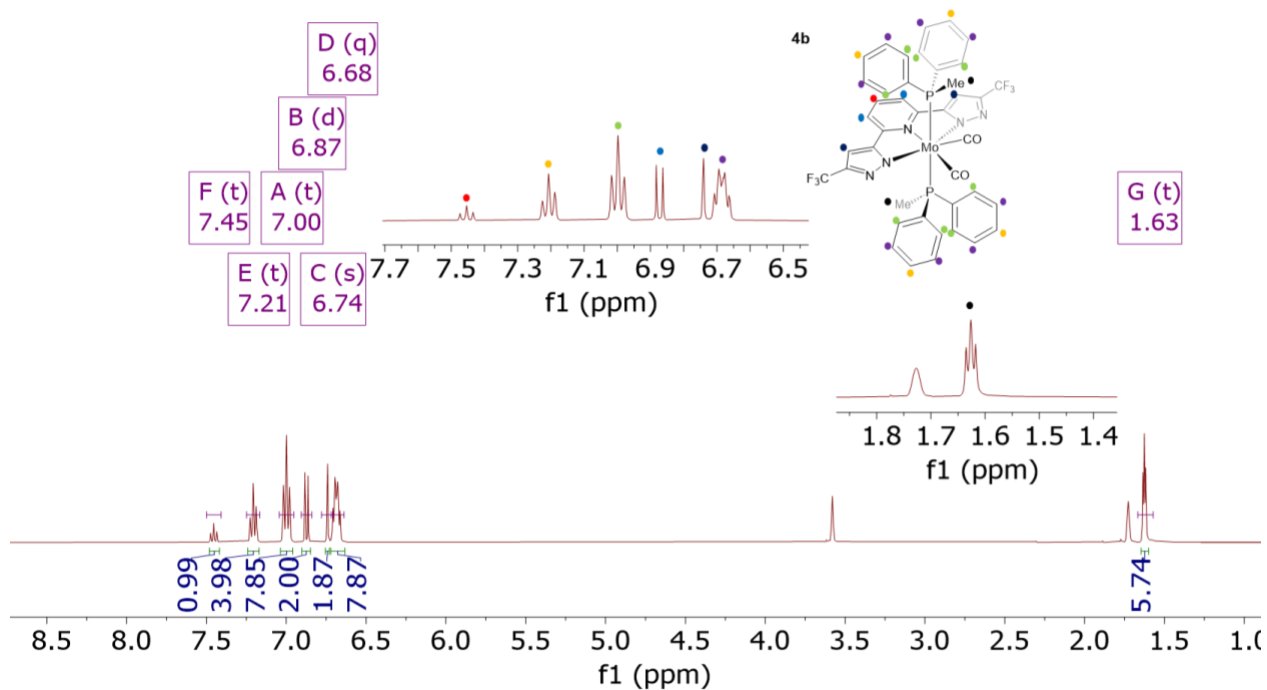

**Figure S13.**  $^1\text{H}$  NMR (40 MHz,  $\text{THF-}d_8$ ) of compound **4b**:  $\delta$  7.45 (t, 1H), 7.21 (t,  $J = 7.4$  Hz, 4H), 7.00 (t, 8H), 6.87 (d,  $J = 7.9$  Hz, 2H), 6.74 (s, 2H), 6.68 (q, 8H), 1.63 (t,  $J = 3.5$  Hz, 6H).

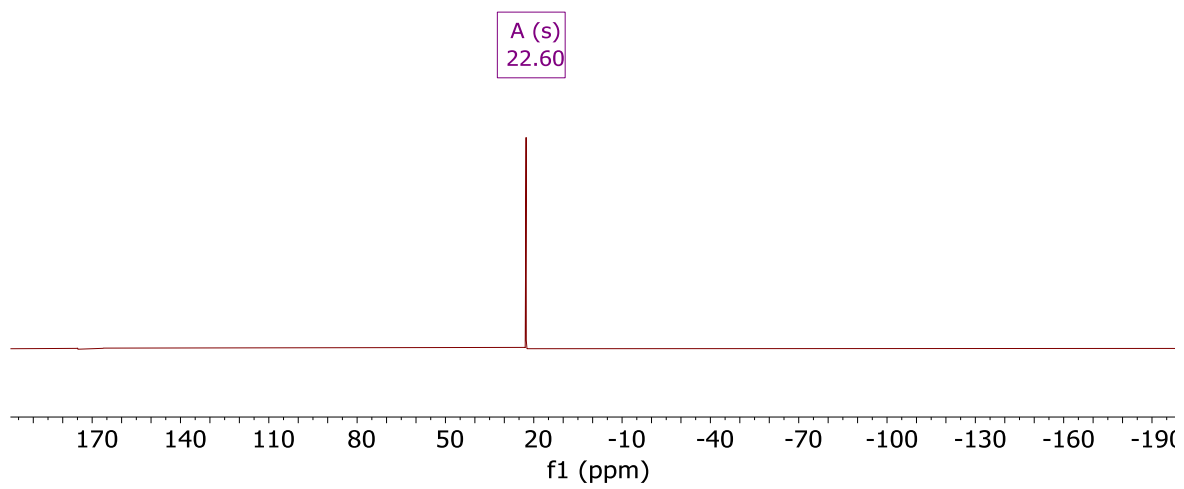

**Figure S14** :  $^{31}\text{P}\{\text{H}\}$  NMR (162 MHz, THF- $d_8$ ) of compound **4b**:  $\delta$  22.60 (s).

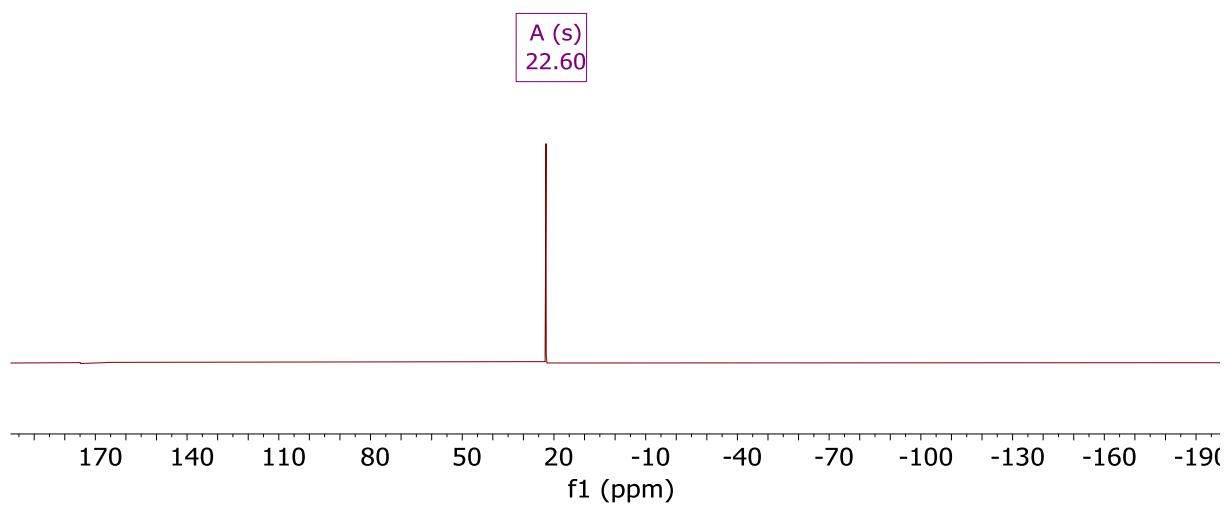

**Figure S15.**  $^{19}\text{F}$  NMR (377 MHz,  $\text{THF-}d_8$ ) of compound **4b**:  $\delta$  -61.55 (s, 6F).

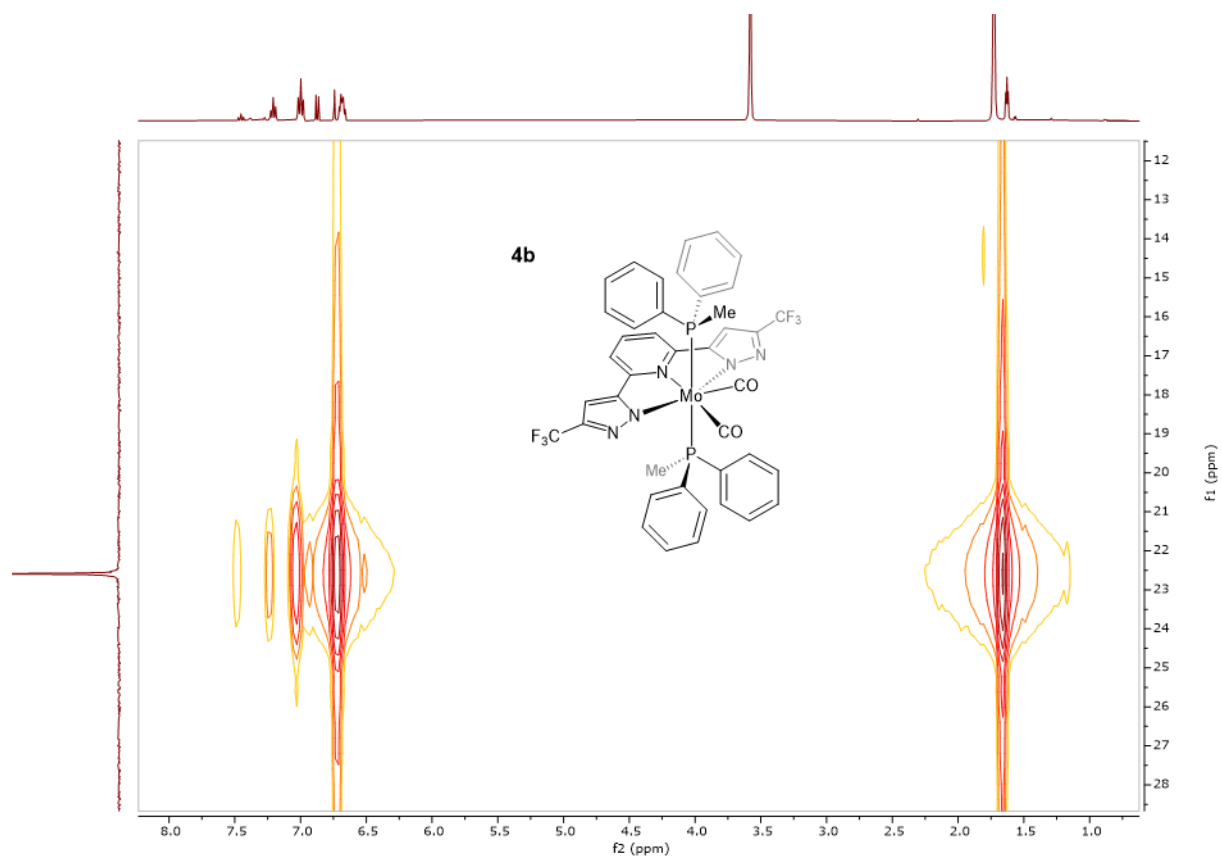

**Figure S16.** 2D NMR  $^{31}\text{P}$  HMQC (400MHz, THF) of compound **4b**



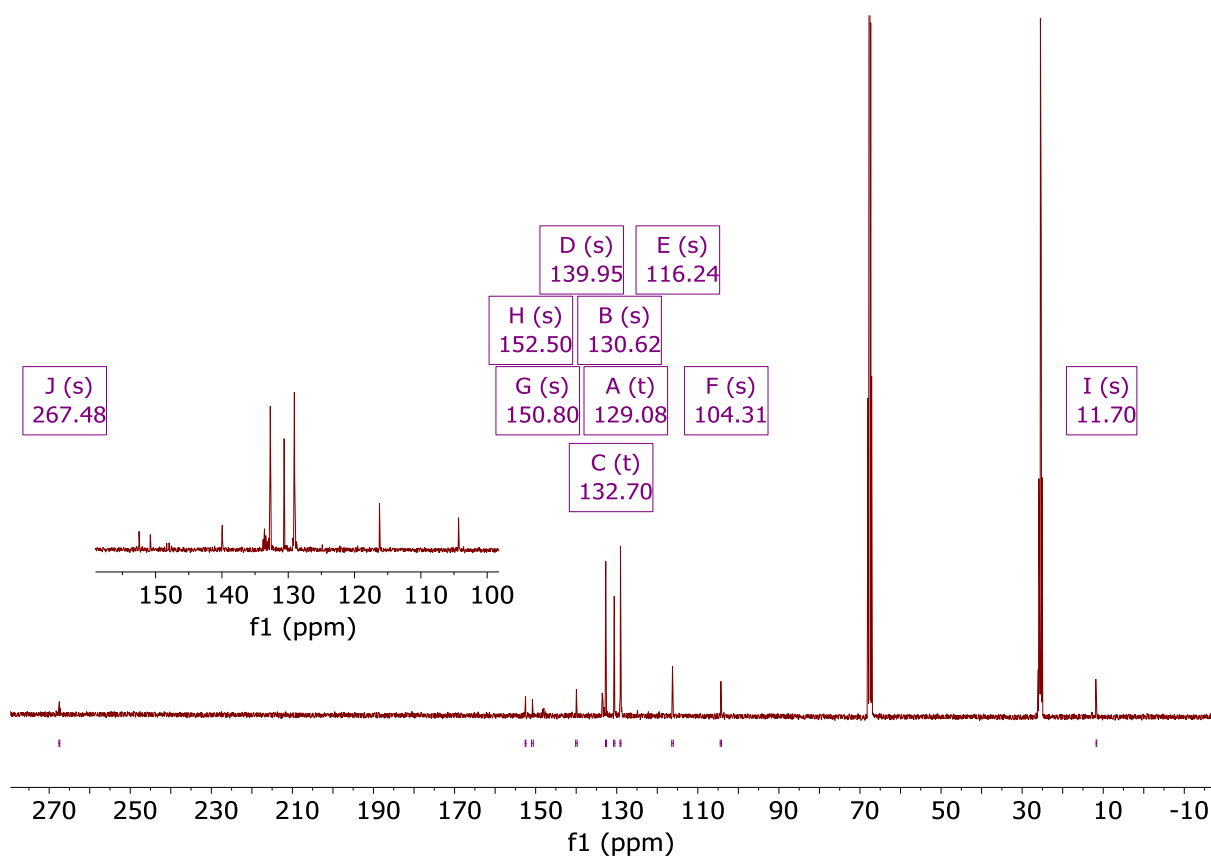

**Figure S17.**  $^{13}\text{C}\{^1\text{H}\}$  NMR (101 MHz, THF) of compound **4b**:  $\delta$  267.48, 152.50, 150.80, 139.95, 132.70 (t,  $J = 5.5$  Hz), 130.62, 129.08 (t,  $J = 4.6$  Hz), 116.24, 104.31, 11.70.

### 1.2.2. Complex 5b

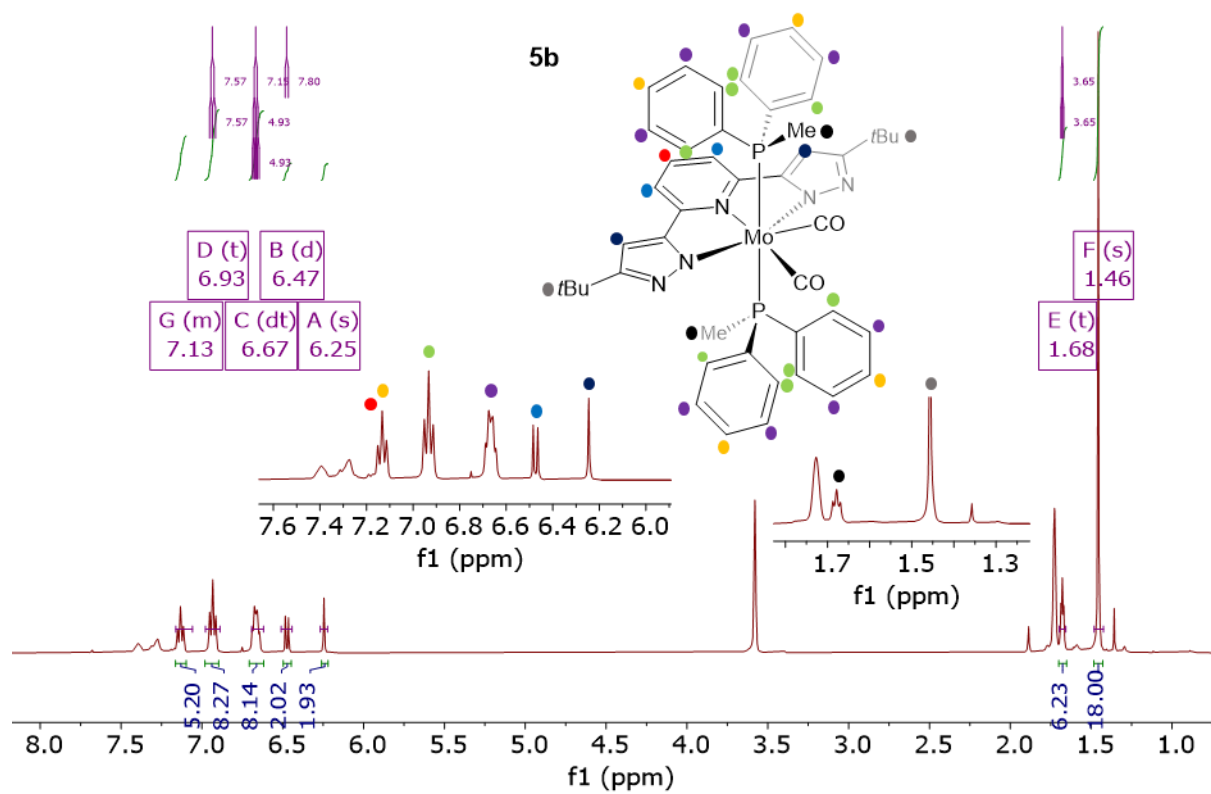

**Figure S18.** <sup>1</sup>H NMR (400 MHz, THF-*d*<sub>8</sub>) of compound **5b**:  $\delta$  7.11 (t, 4H), 6.93 (t,  $J = 7.6$  Hz, 8H), 6.67 (dt,  $J = 7.1, 4.9$  Hz, 8H), 6.47 (d,  $J = 7.8$  Hz, 2H), 6.25 (s, 2H), 1.68 (t,  $J = 3.6$  Hz, 6H), 1.46 (s, 18H).

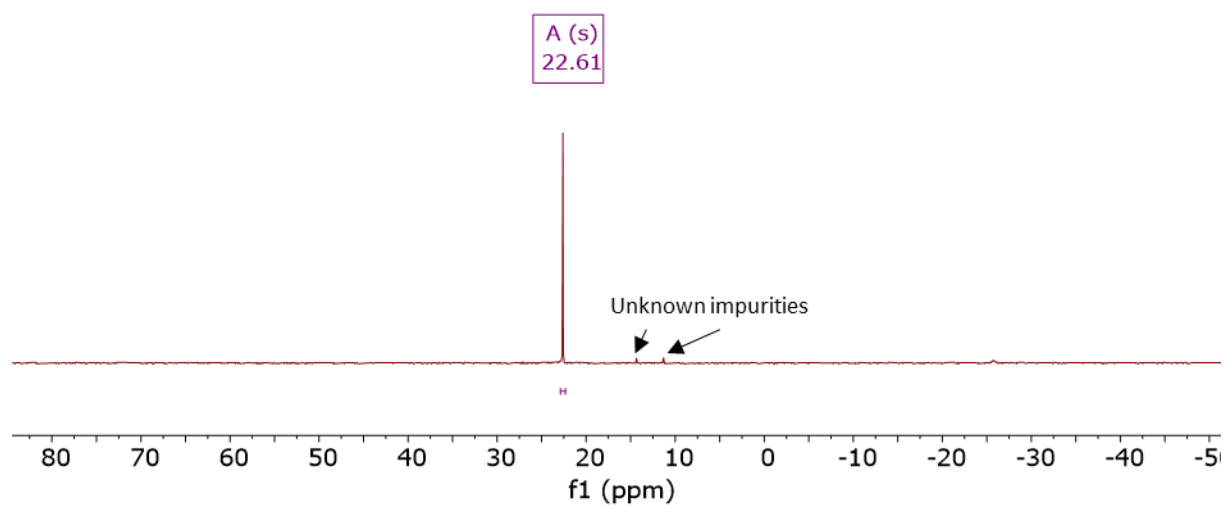

**Figure S19.**  $^{31}\text{P}$  NMR (400 MHz,  $\text{THF-}d_8$ ) of compound **5b**:  $\delta$  22.61 (s).

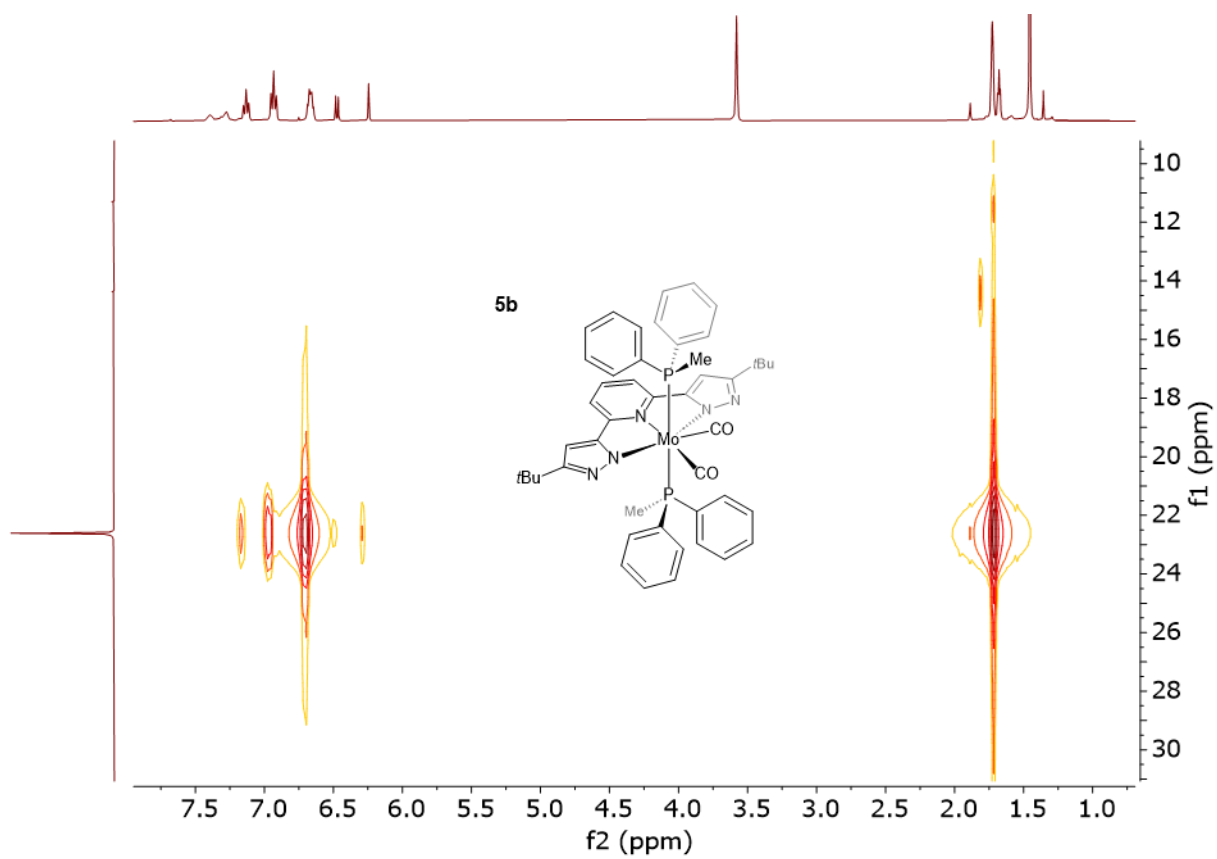

**Figure S20.** 2D NMR  $^{31}\text{P}$  HMQC (400 MHz,  $\text{THF-}d_8$ ) of compound **5b**.

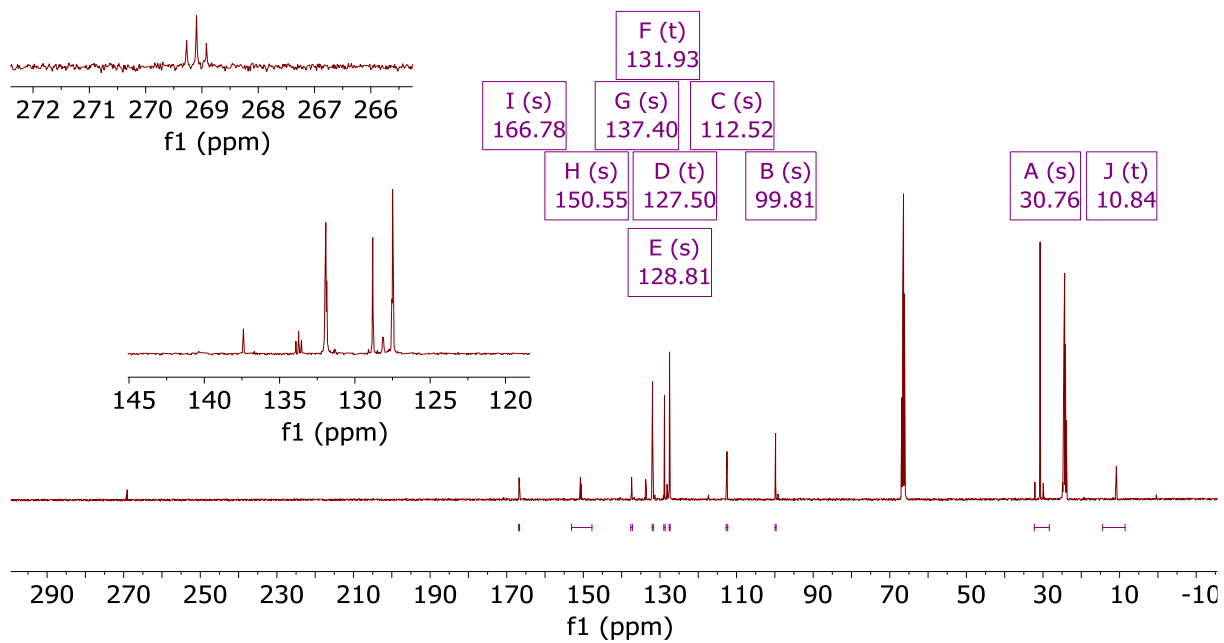

**Figure S21.** <sup>13</sup>C NMR (400 MHz, THF-*d*<sub>8</sub>) of compound **5b**: δ 269 (t, *J* = 17,7 Hz), 166.78, 150.55, 137.40, 131.93 (t, *J* = 5.6 Hz), 128.81, 127.50 (t, *J* = 4.6 Hz), 112.52, 99.81, 30.76., 10.84.

### 1.2.3. Complex 6b

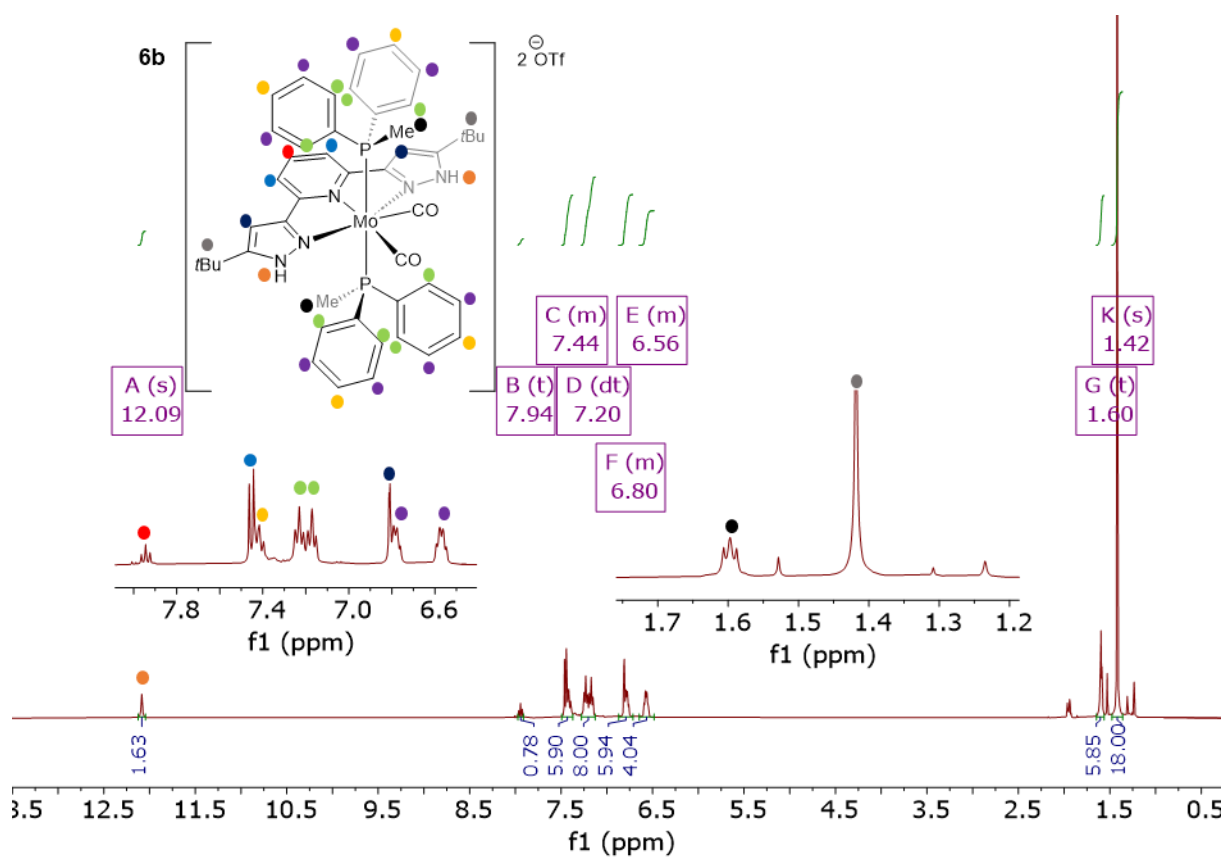

**Figure S22.** <sup>1</sup>H NMR (400 MHz, CD<sub>3</sub>CN) of compound **6b**: δ 12.09 (s, 2H), 7.94 (t, J = 7.9, 1.2 Hz, 1H), 7.50 – 7.38 (m, 6H), 7.20 (dt, J = 23.4, 7.6 Hz, 9H), 6.84 – 6.74 (m, 6H), 6.62 – 6.52 (m, 4H), 1.60 (t, J = 3.7 Hz, 6H), 1.42 (s, 18H).

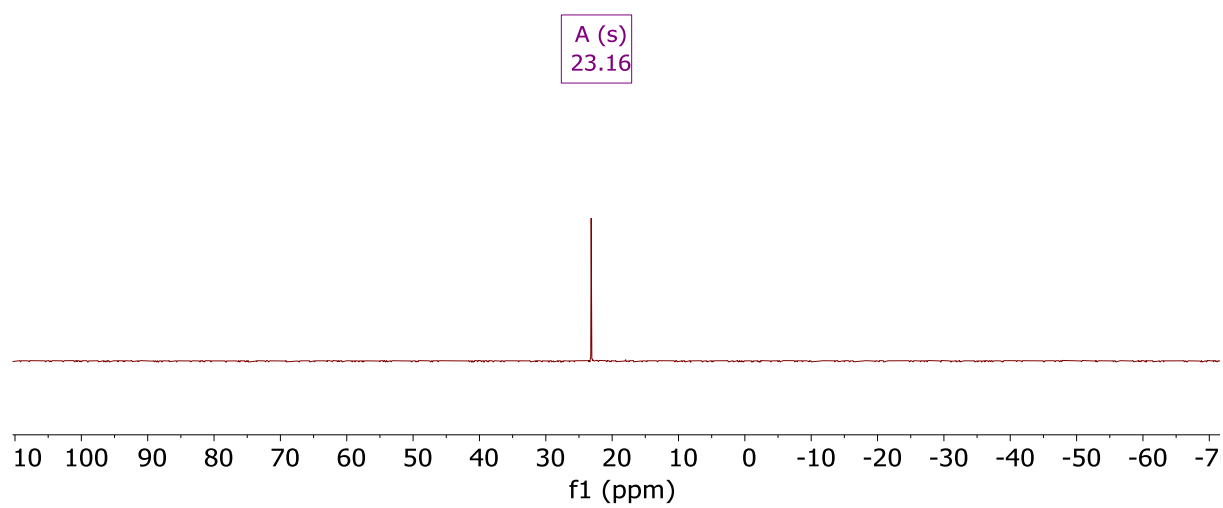

**Figure S23.**  $^{31}\text{P}\{^1\text{H}\}$  NMR (162 MHz,  $\text{CD}_3\text{CN}$ ) of compound **6b**:  $\delta$  23.16 (s).

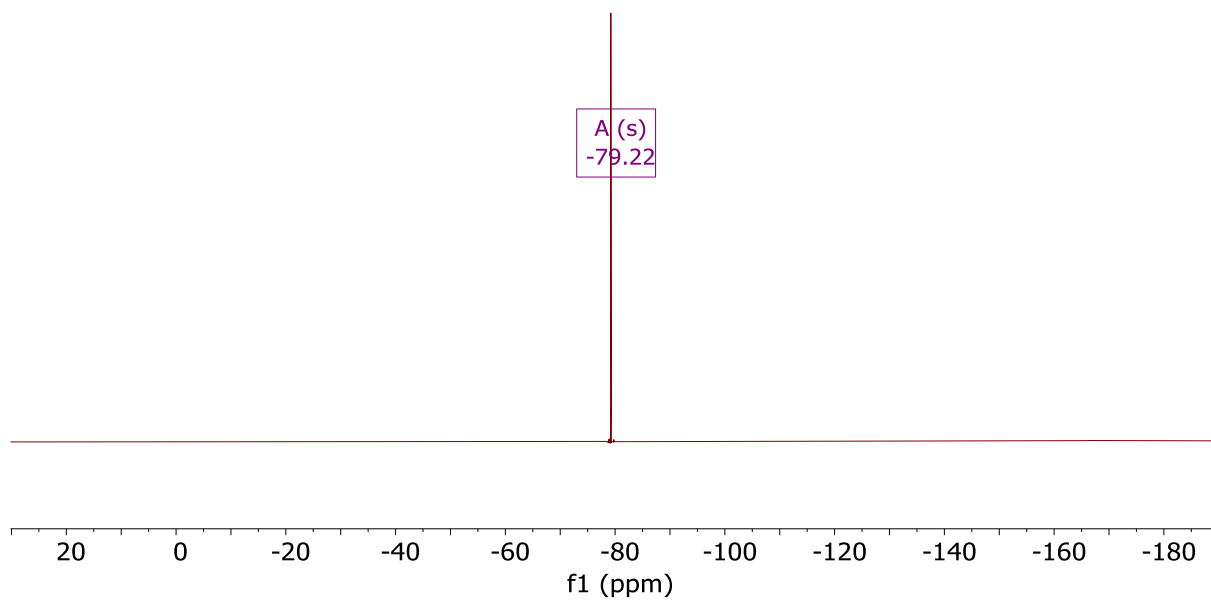

**Figure S24.**  $^{19}\text{F}$  NMR (377 MHz,  $\text{CD}_3\text{CN}$ ) of compound **6b**:  $\delta$  -79.22 (s).



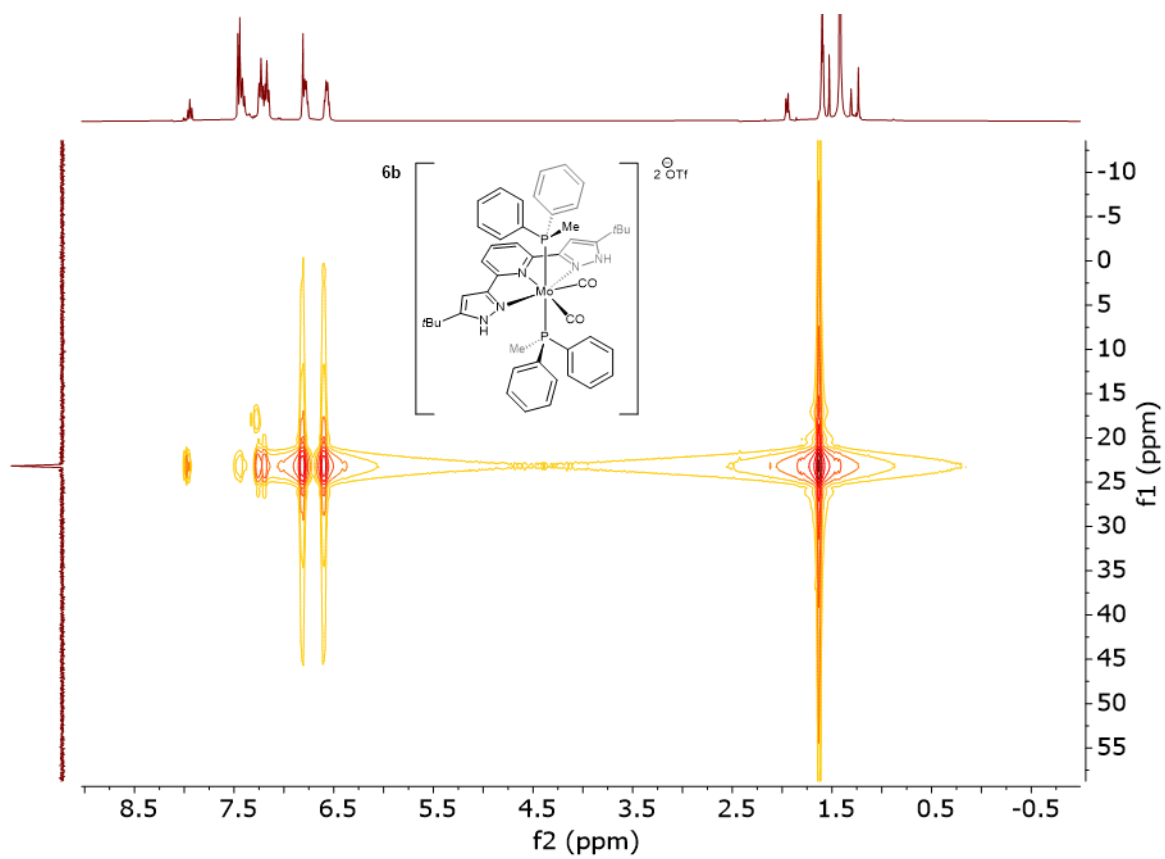

**Figure S25.** 2D NMR  $^{31}\text{P}$  HMQC (162 MHz,  $\text{CD}_3\text{CN}$ ) of compound **6b**.

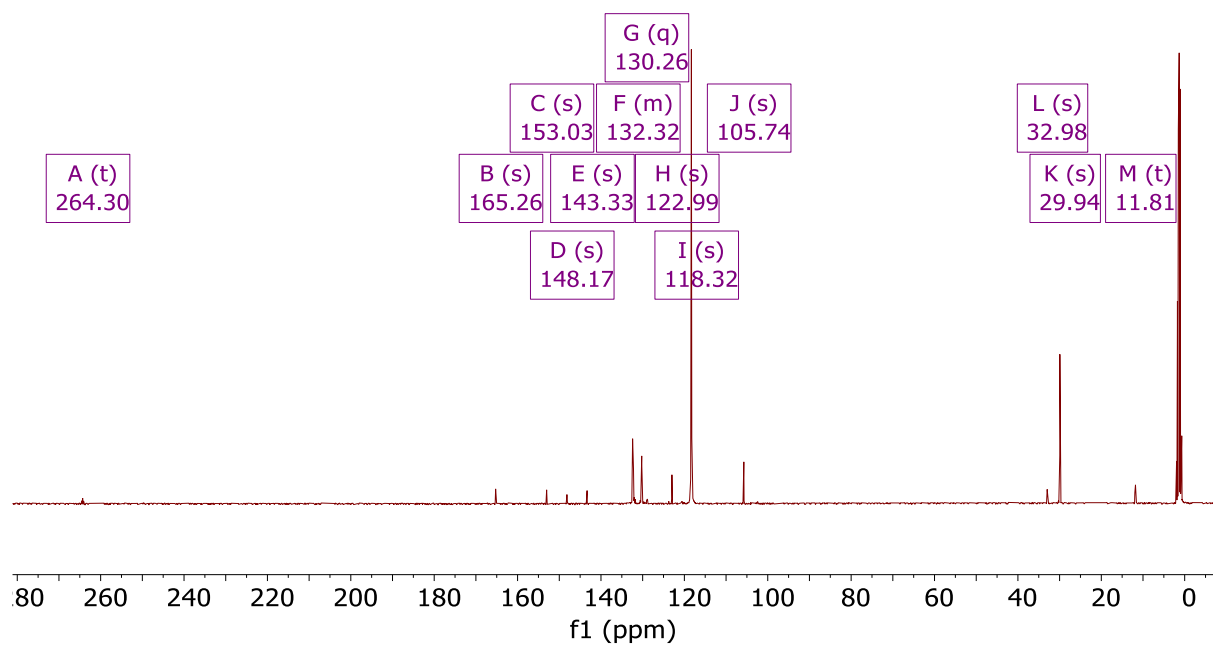

**Figure S26.**  $^{13}\text{C}\{^1\text{H}\}$  NMR (101 MHz,  $\text{CD}_3\text{CN}$ ) of compound **6b**:  $\delta$  264.30 (t,  $J = 20.9$  Hz), 165.26, 153.03, 148.17, 143.33, 132.77 – 132.13 (m), 130.26 (q,  $J = 5.4$  Hz), 122.99, 118.32, 105.74, 32.98, 29.94, 11.81 (t,  $J = 14.8$  Hz).

### 1.3. Compounds 4c, 5c and 6c.

#### 1.3.1. Complex 4c

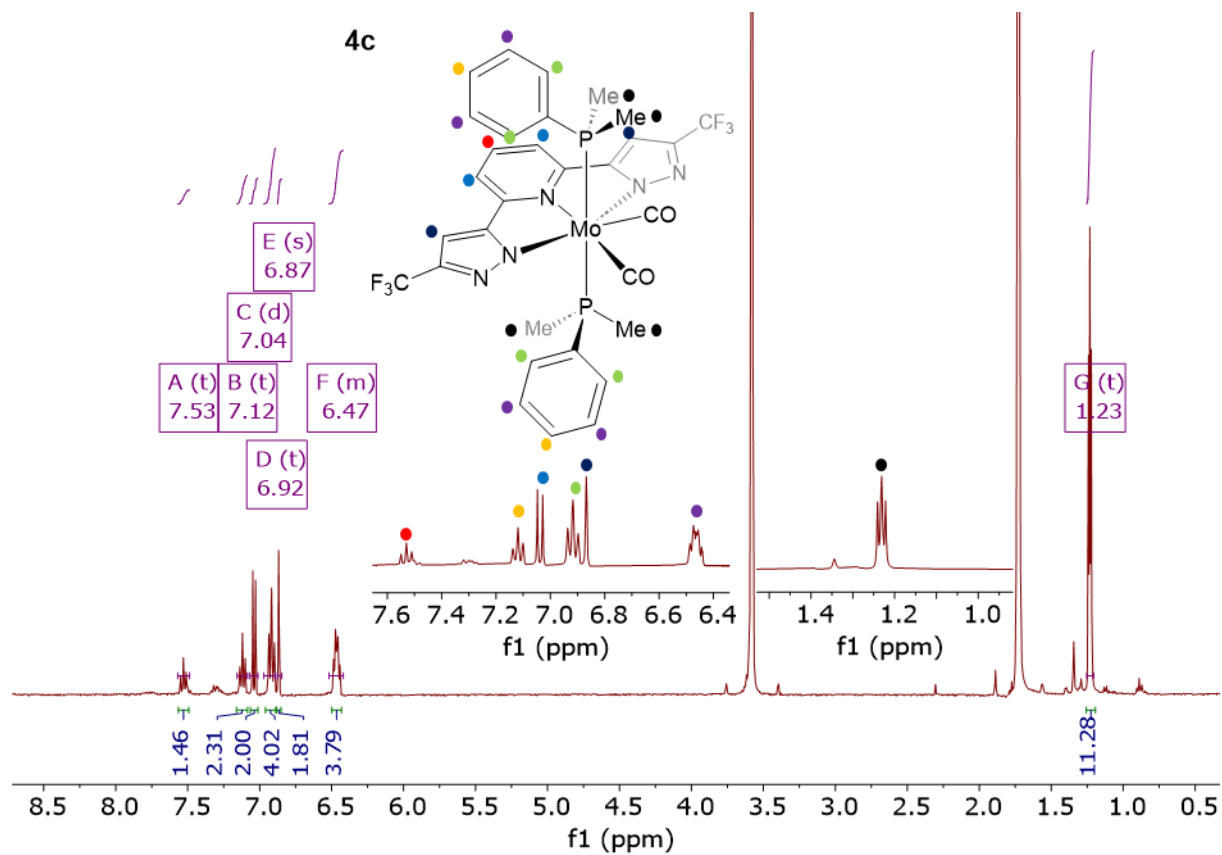

**Figure S27.** <sup>1</sup>H NMR (400 MHz, THF-*d*<sub>8</sub>) of compound **4c**: δ 7.53 (t, *J* = 7.8 Hz, 1H), 7.12 (t, *J* = 7.4 Hz, 2H), 7.04 (d, *J* = 7.8 Hz, 2H), 6.92 (t, *J* = 7.6 Hz, 4H), 6.87 (s, 2H), 6.52 – 6.42 (m, 4H), 1.23 (t, 12H).

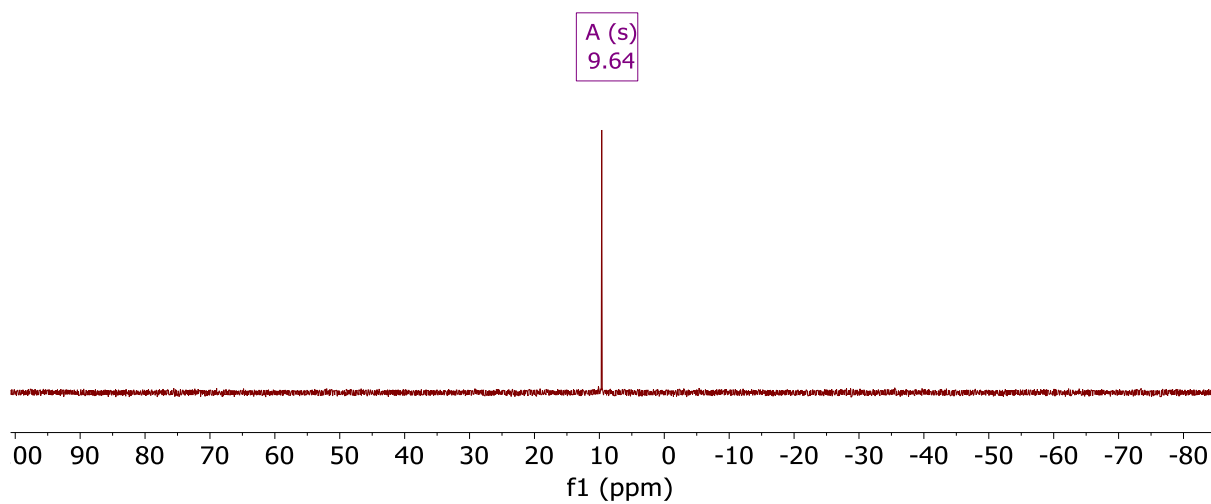

**Figure S28.**  $^{31}\text{P}\{^1\text{H}\}$  NMR (162 MHz, THF- $d_8$ ) of compound **4c**:  $\delta$  9.64 (s).

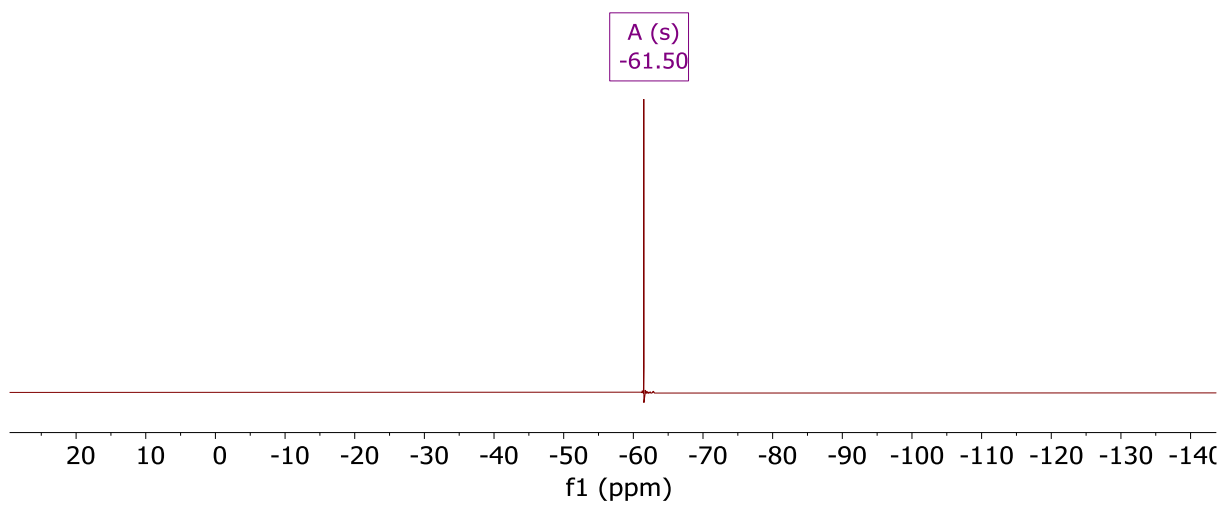

**Figure S29.**  $^{19}\text{F}$  NMR (377 MHz, THF) of compound **4c**:  $\delta$  -61.50 (s).

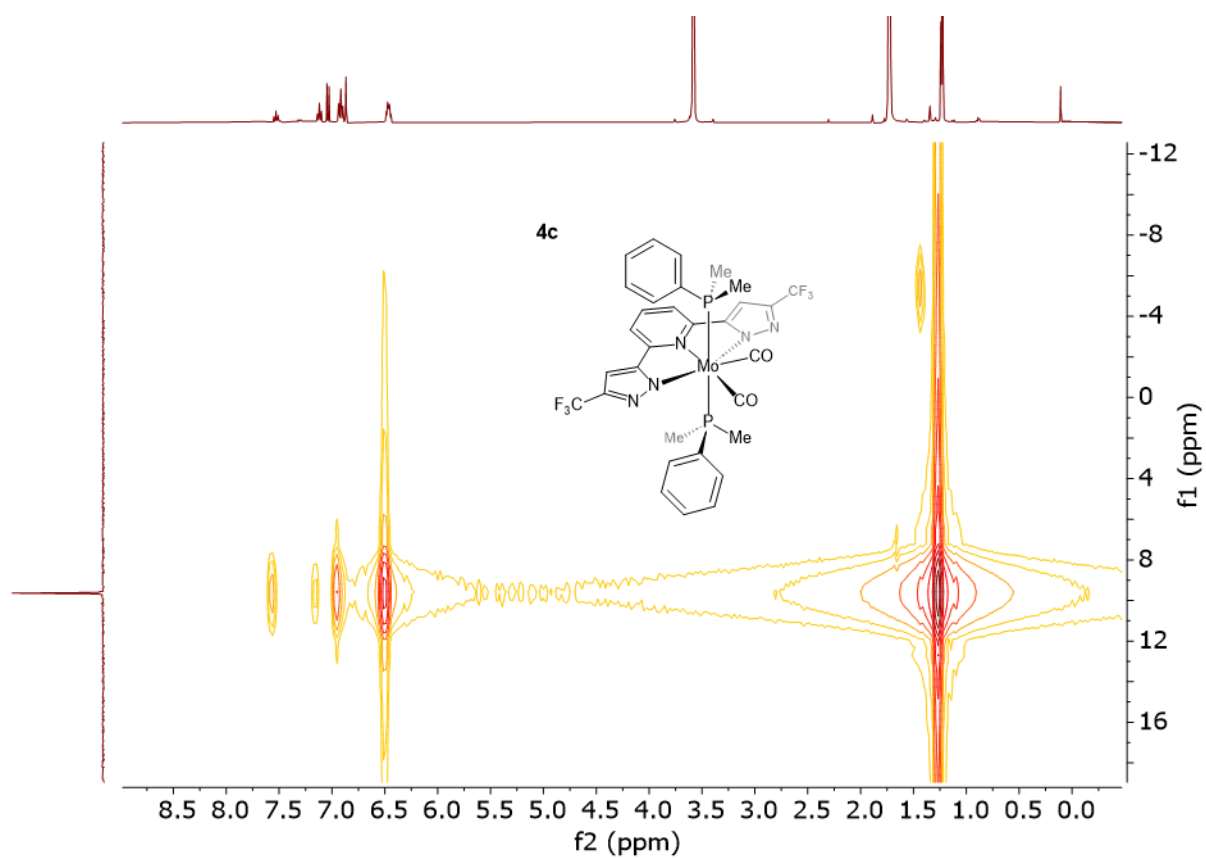

**Figure S30.** 2D NMR  $^{31}\text{P}$  HMQC (162MHz, THF-*d*<sub>8</sub>) of compound **4c**.

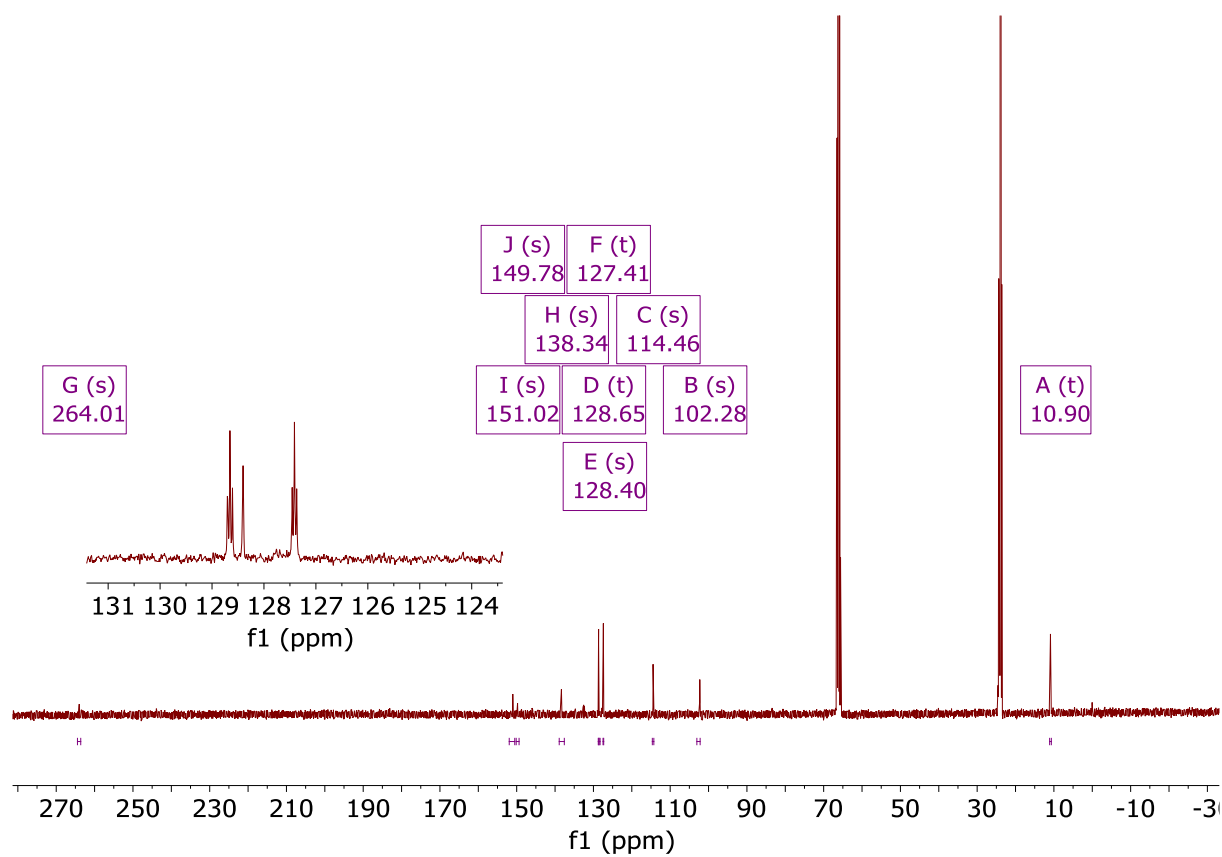

**Figure S31.**  $^{13}\text{C}\{^1\text{H}\}$  NMR (400 MHz,  $\text{THF-}d_8$ ) of compound **4c**:  $\delta$  264.01, 151.02, 149.78, 138.34, 128.65 (t,  $J = 4.9$  Hz), 128.40, 127.41 (t,  $J = 4.4$  Hz), 114.46, 102.28, 10.90 (t,  $J = 13.1$  Hz).

### 1.3.2. Complex 5c

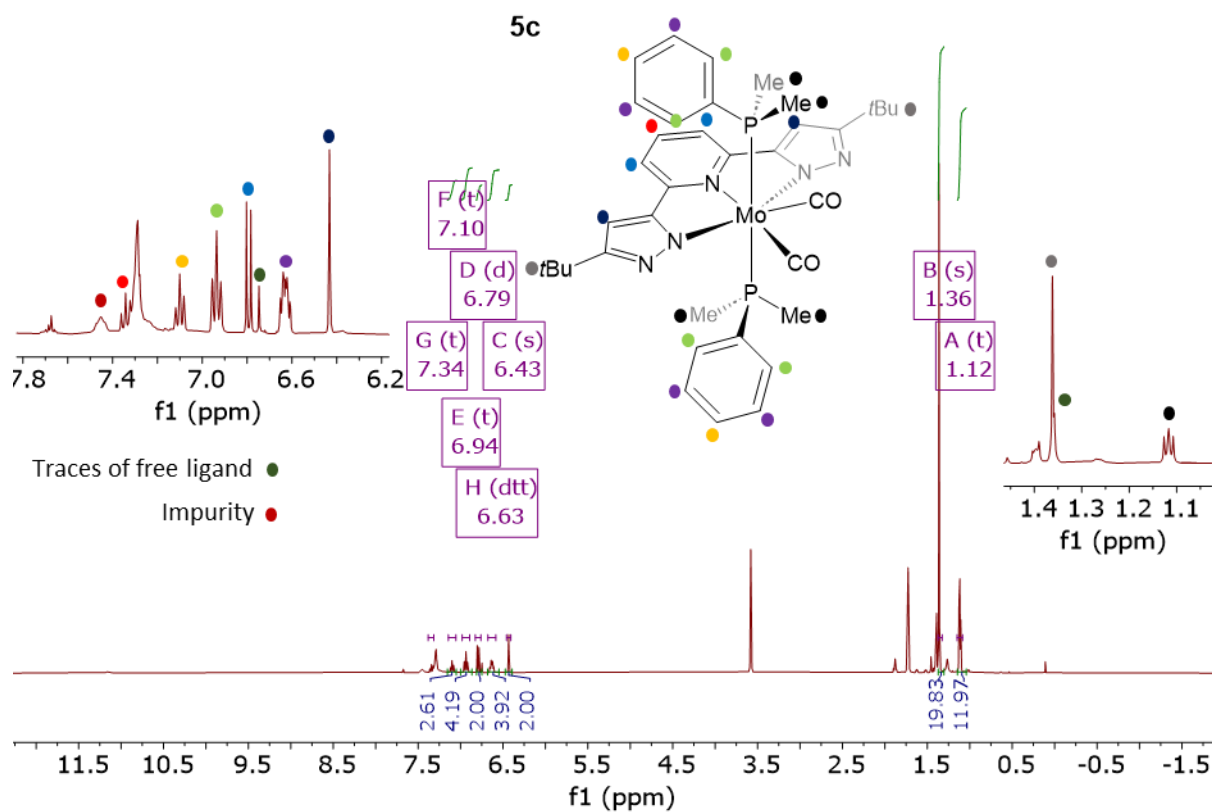

**Figure S32.**  $^1\text{H}$  NMR (400 MHz,  $\text{THF-}d_8$ ) of compound **5c**:  $\delta$  7.34 (t, 1H), 7.10 (t,  $J = 7.5, 5.9, 1.8, 0.9$  Hz, 2H), 6.94 (t,  $J = 8.7, 7.6, 1.2$  Hz, 4H), 6.79 (d,  $J = 7.8$  Hz, 2H), 6.63 (dt,  $J = 8.4, 5.0, 1.5$  Hz, 4H), 6.43 (s, 2H), 1.36 (s, 19H), 1.12 (t, 12H).



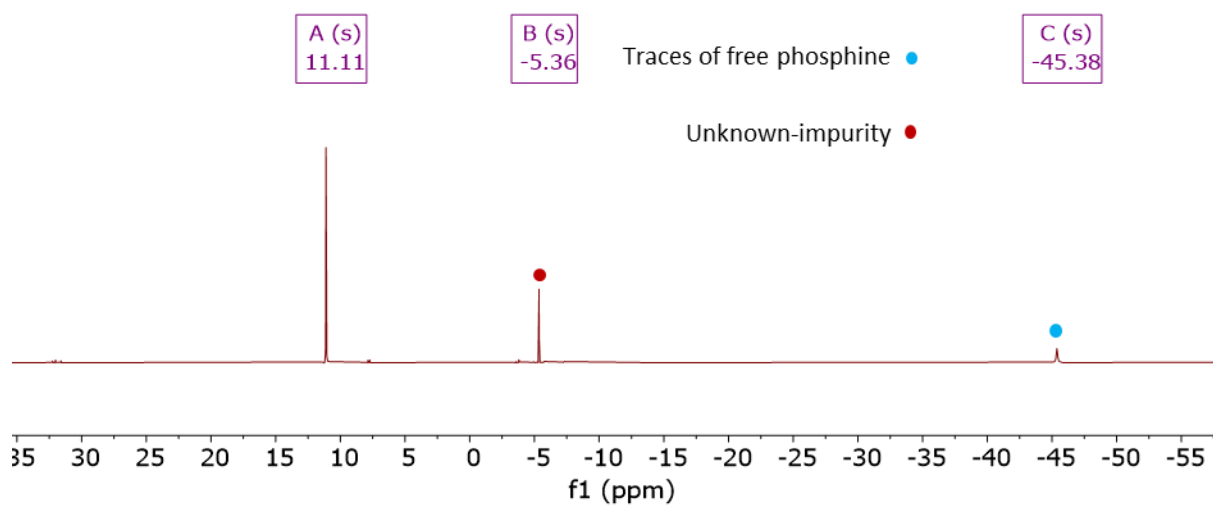

Figure S33.  $^{31}\text{P}\{\text{H}\}$  NMR (162 MHz,  $\text{THF-}d_8$ ) of compound **5c**:  $\delta$  11.11.

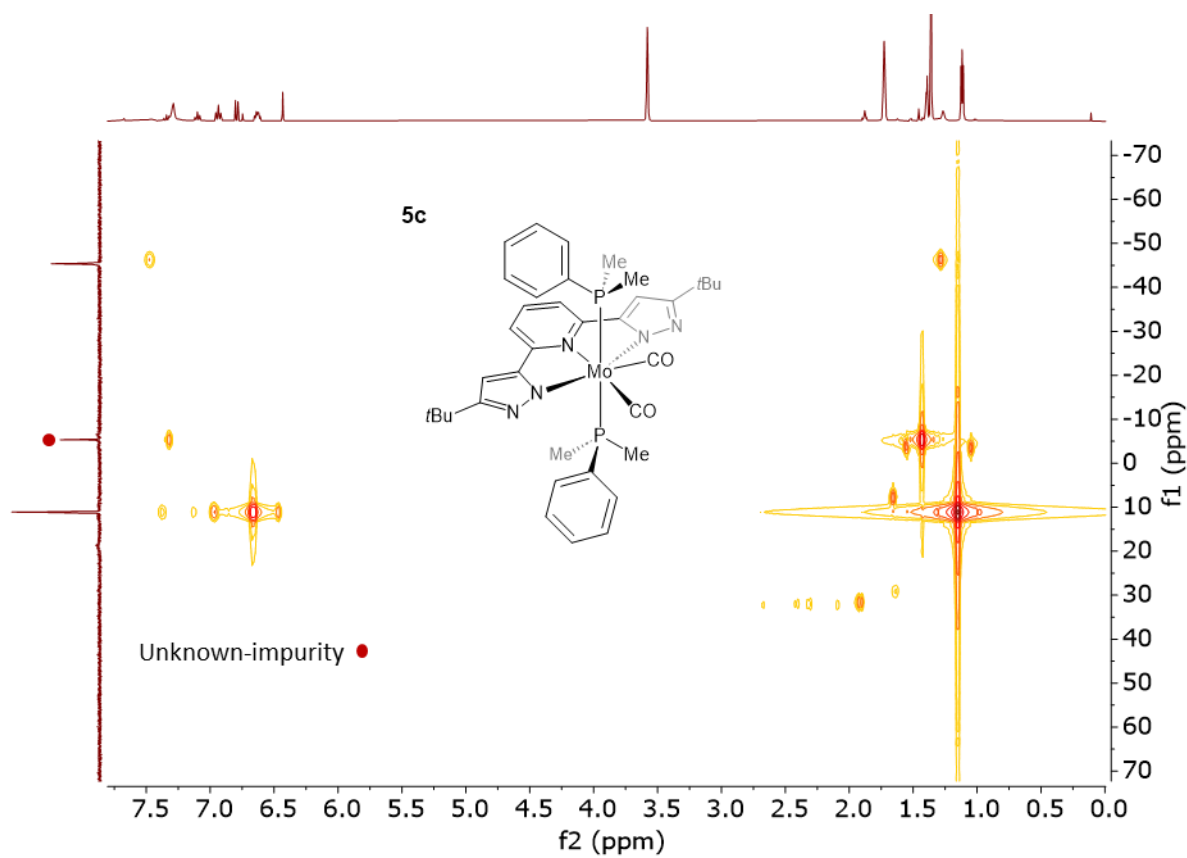

Figure S34. 2D NMR  $^{31}\text{P}$  HMQC (162MHz,  $\text{THF-}d_8$ ) of compound **5c**

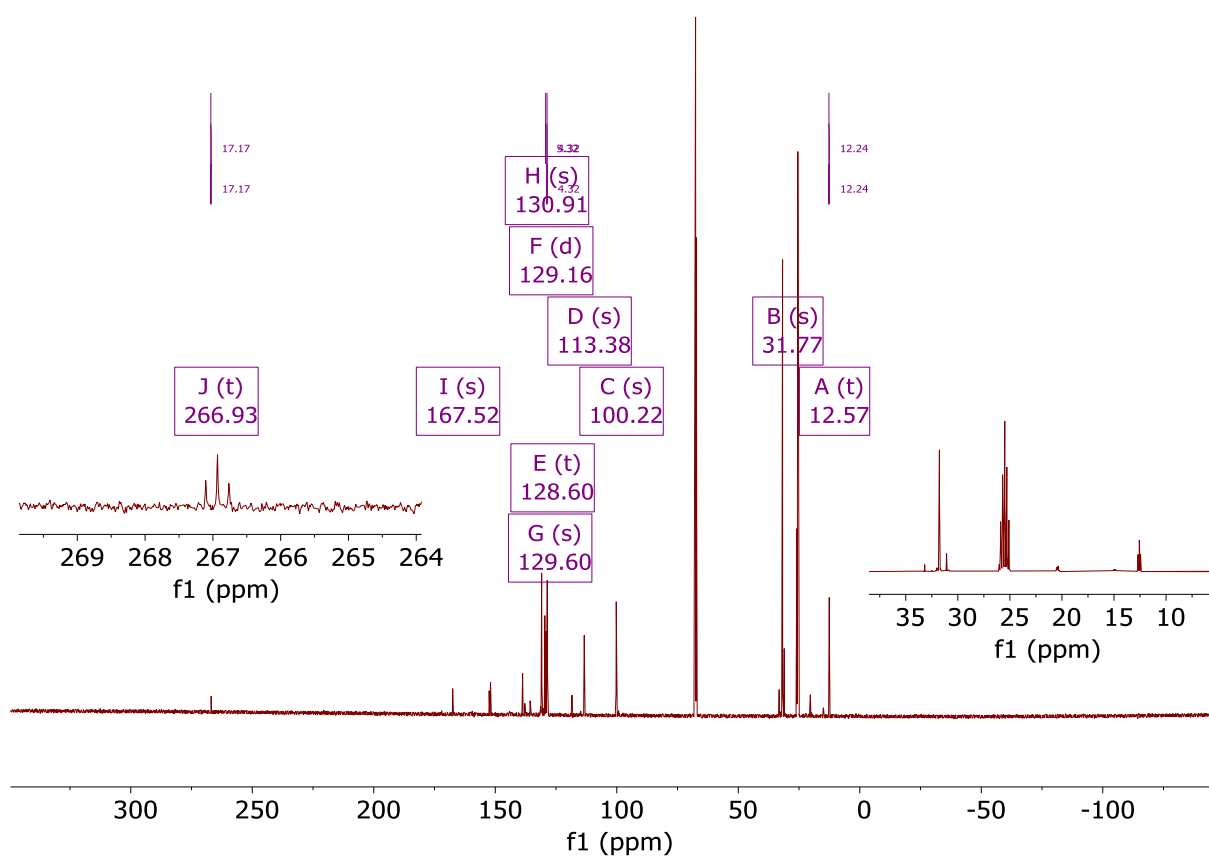

**Figure S35.**  $^{13}\text{C}\{^1\text{H}\}$  NMR (101 MHz, THF- $d_8$ ) of compound **5c**:  $\delta$  266.93 (t,  $J = 17.2$  Hz), 167.52, 130.91, 129.60, 129.16 (d,  $J = 5.3$  Hz), 128.60 (t,  $J = 4.3$  Hz), 113.38, 100.22, 31.77, 12.57 (t,  $J = 12.2$  Hz).

### 1.3.3. Complex 6c

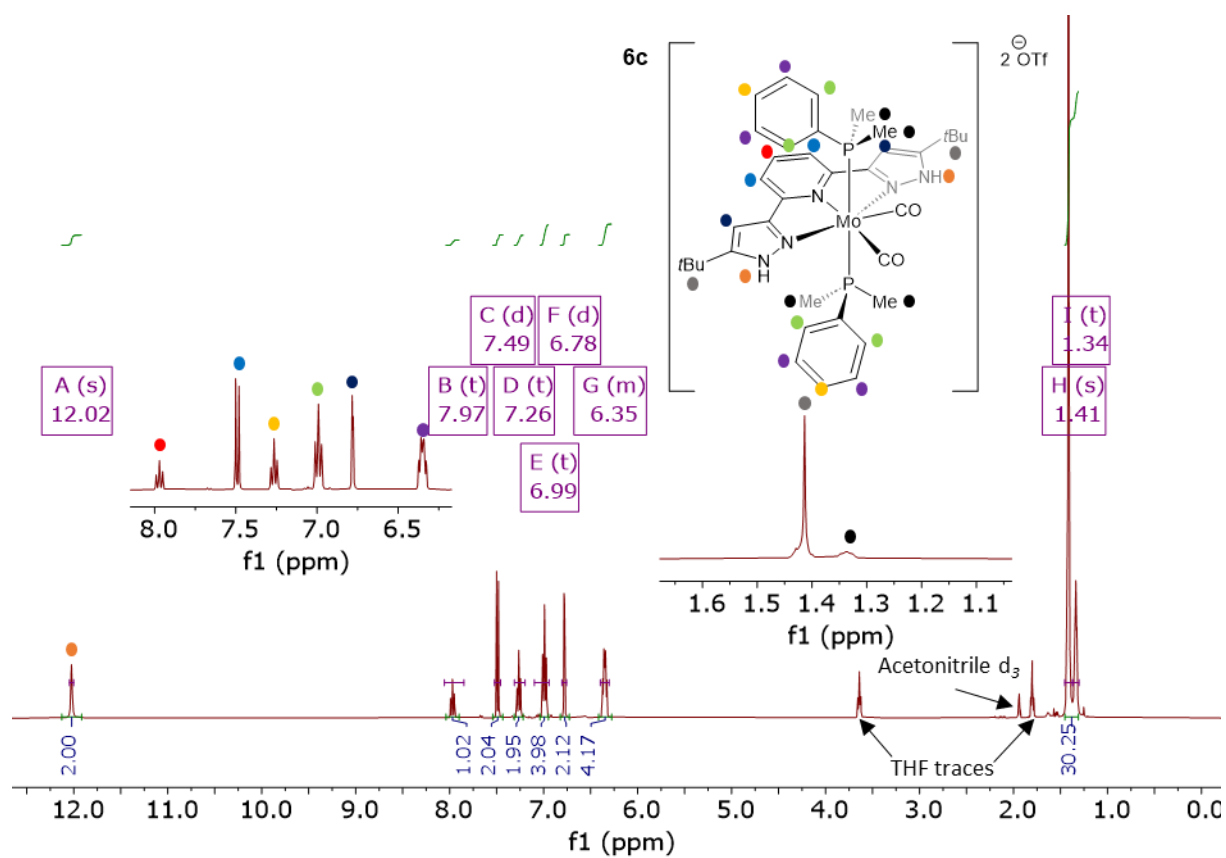

**Figure S36.**  $^1\text{H}$  NMR (400 MHz,  $\text{CD}_3\text{CN}$ ) of compound **6c**:  $\delta$  12.02 (s, 2H), 7.97 (t, 1H), 7.49 (d,  $J = 8.0$  Hz, 2H), 7.26 (t, 2H), 6.99 (t,  $J = 8.7, 7.5, 1.3$  Hz, 4H), 6.78 (d,  $J = 2.0$  Hz, 2H), 6.40 – 6.30 (m, 4H), 1.41 (s, 18H), 1.34 (t,  $J = 4.4$  Hz, 12H).

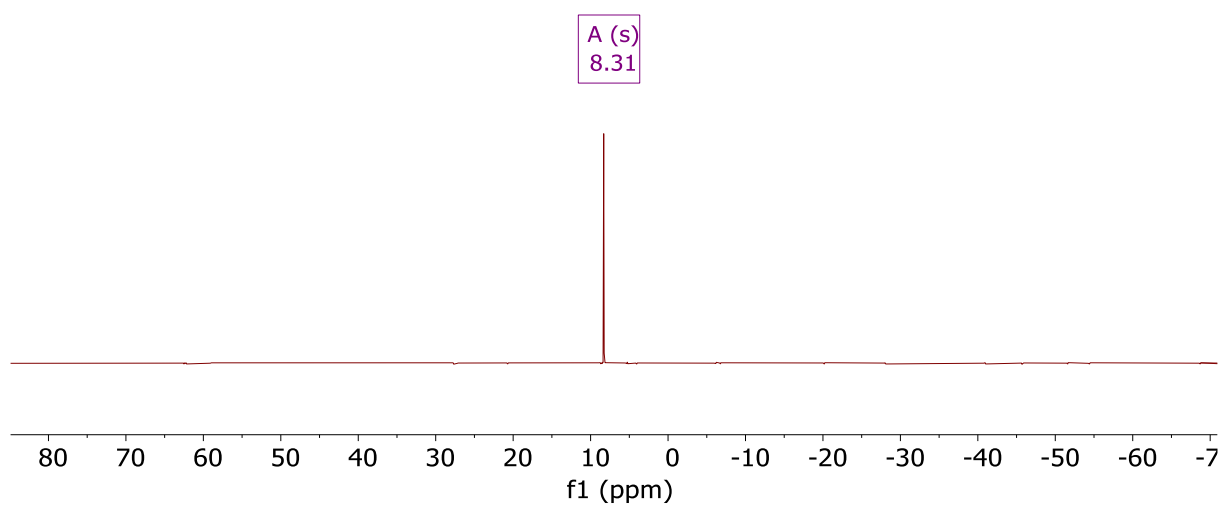

**Figure S37.**  $^{31}\text{P}\{^1\text{H}\}$  NMR (162 MHz,  $\text{CD}_3\text{CN}$ ) of compound **6c**:  $\delta$  8.31 (s).

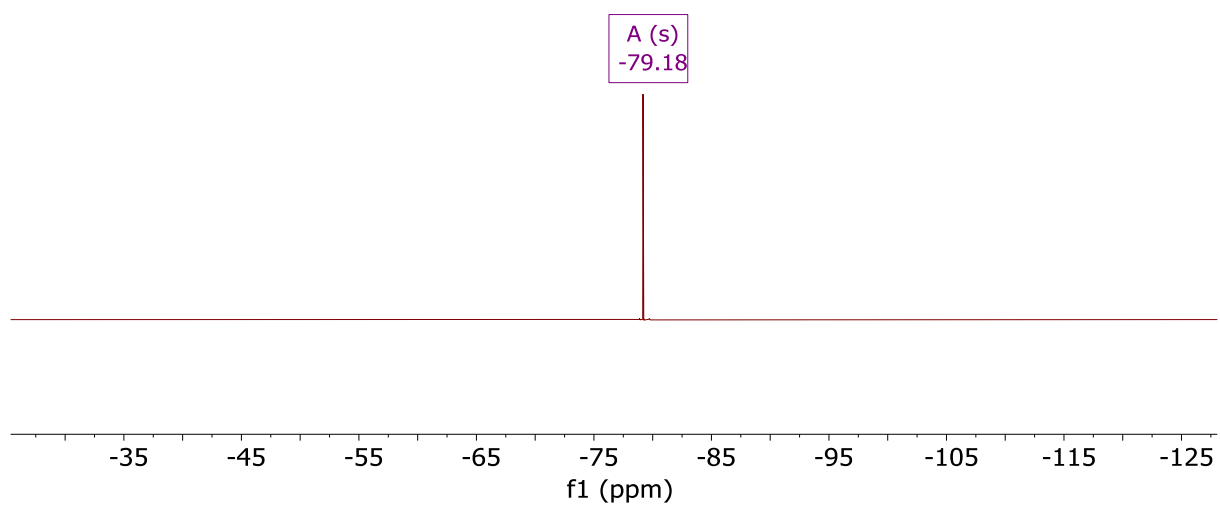

**Figure S38.**  $^{19}\text{F}$  NMR (377 MHz,  $\text{CD}_3\text{CN}$ ) of compound **6c**:  $\delta$  -79.18 (s).

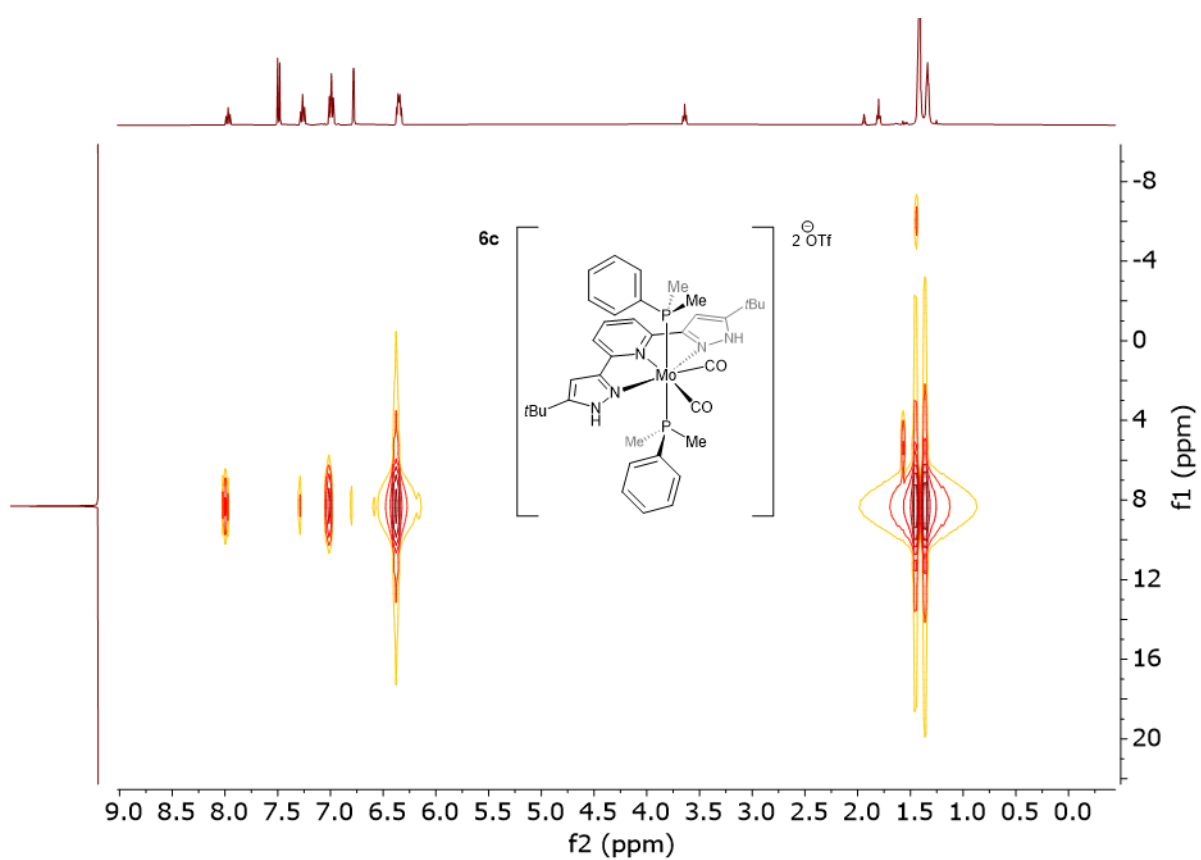

Figure S39. 2D NMR  $^{31}\text{P}$  HMQC (400MHz,  $\text{CD}_3\text{CN}$ ) of compound **6c**.

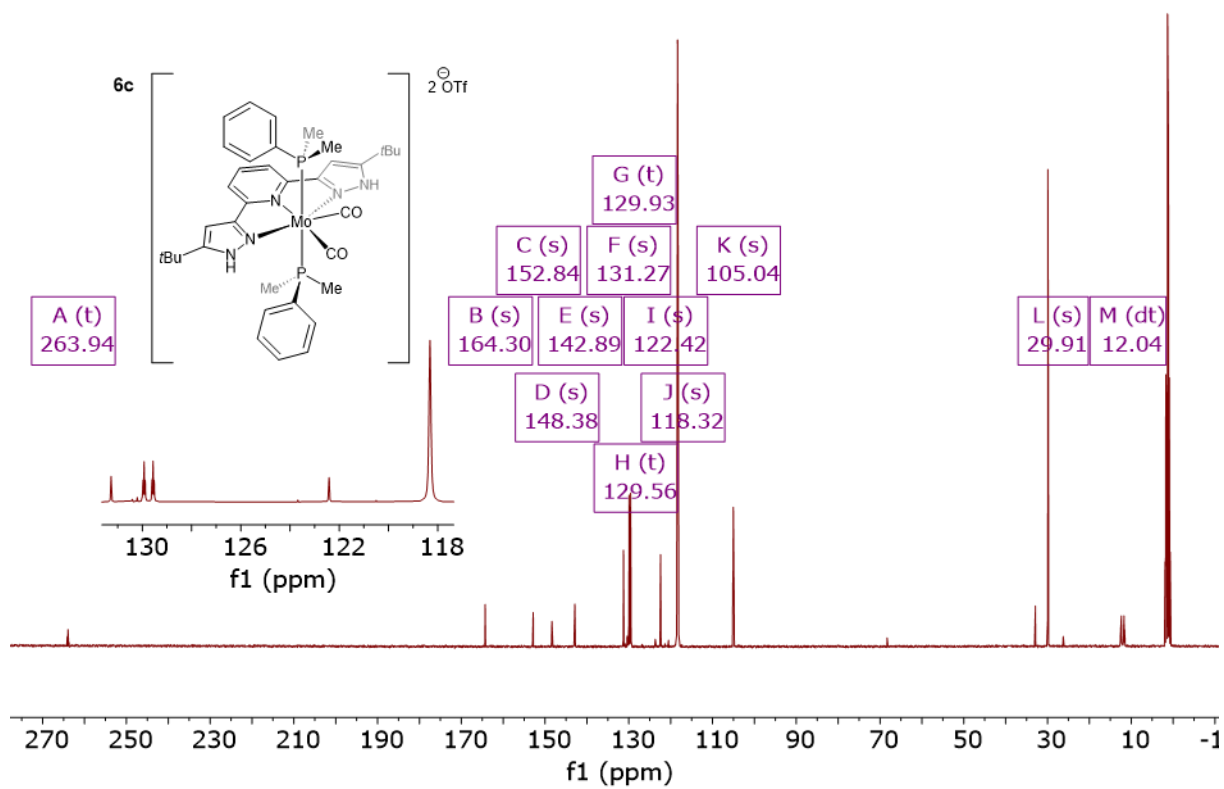

**Figure S40.**  $^{13}\text{C}\{^1\text{H}\}$  NMR (101 MHz,  $\text{CD}_3\text{CN}$ ) of compound **6c**:  $\delta$  263.94 (t,  $J = 20.1$  Hz), 164.30, 152.84, 148.38, 142.89, 131.27, 129.93 (t,  $J = 4.6$  Hz), 129.56 (t,  $J = 4.6$  Hz), 122.42, 118.32, 105.04, 29.91.

## 2. IR spectra

### 2.1. Compounds 4a, 5a and 6a.

#### 2.1.1. Complex 4a

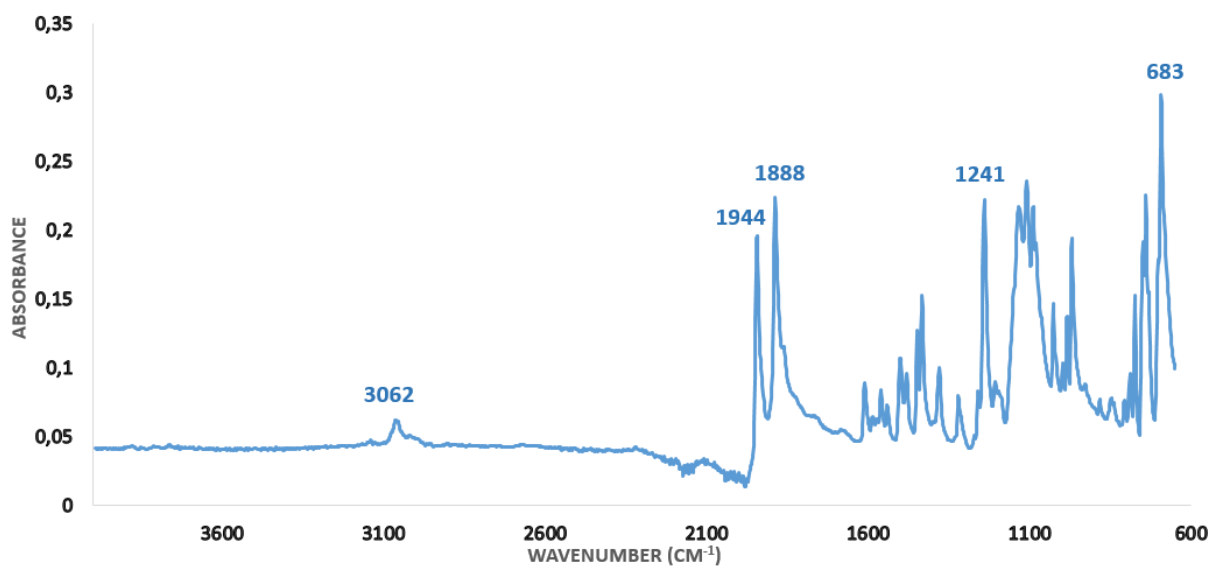

Figure S41. ATR spectrum (298K, under nitrogen) of compound 4a.

#### 2.1.2. Complex 5a

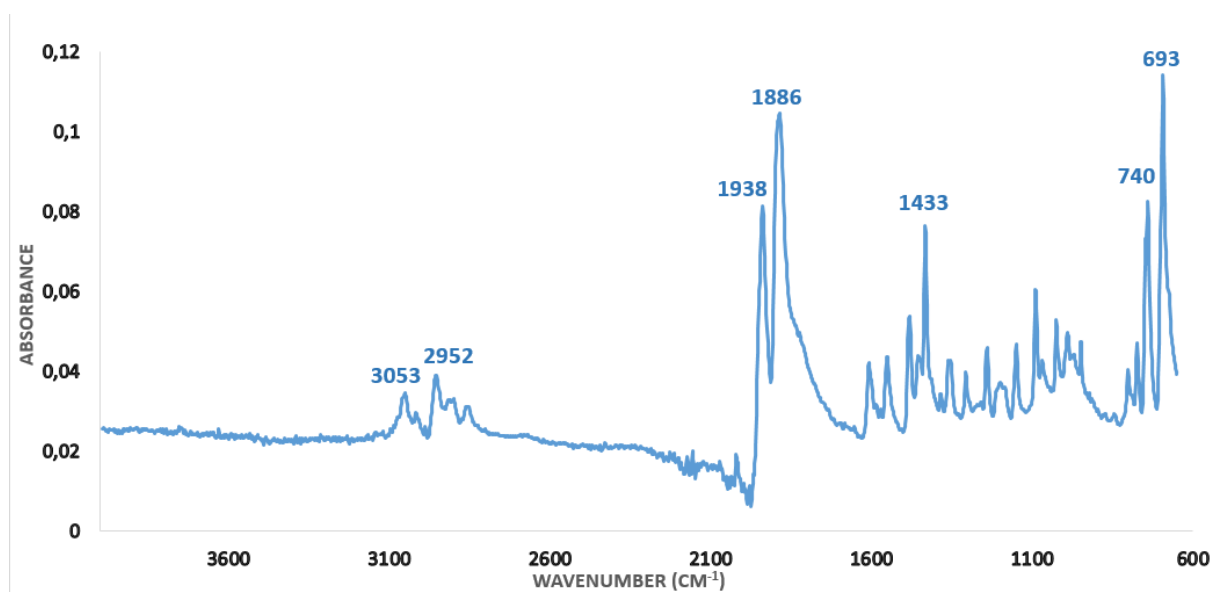

Figure S42. ATR spectrum (298K, under nitrogen) of compound 5a.



### 2.1.3. Complex 6a

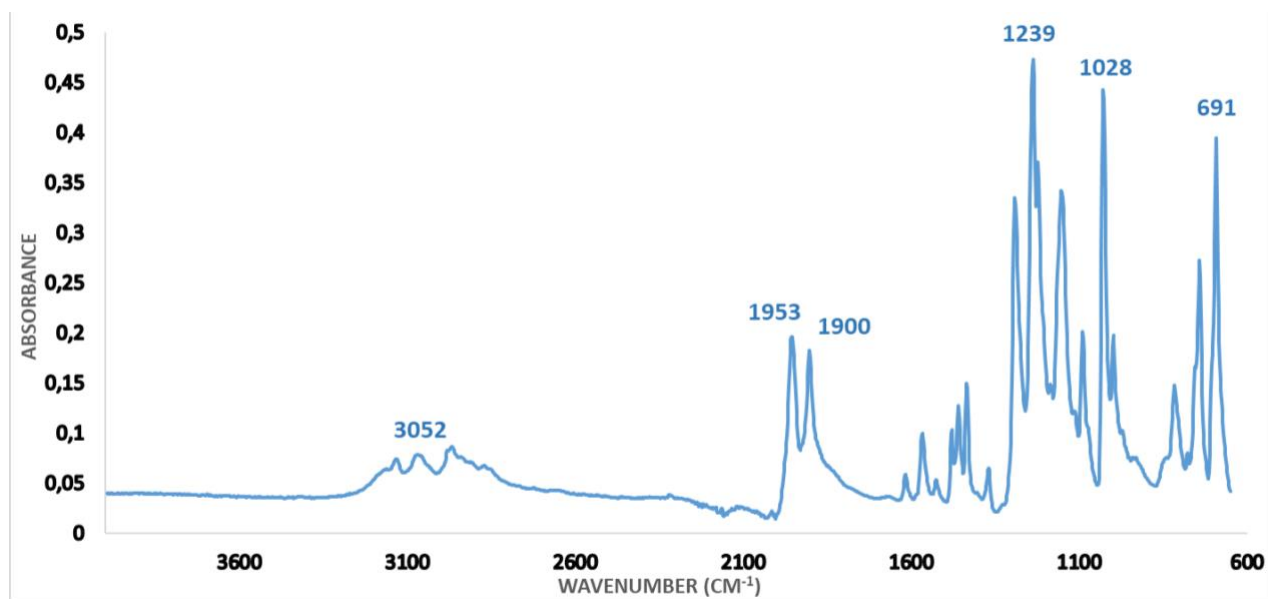

Figure S43. ATR spectrum (298K, under nitrogen) of compound 6a.

## 2.2. Series 4b, 5b and 6b.

### 2.2.1. Complex 4b

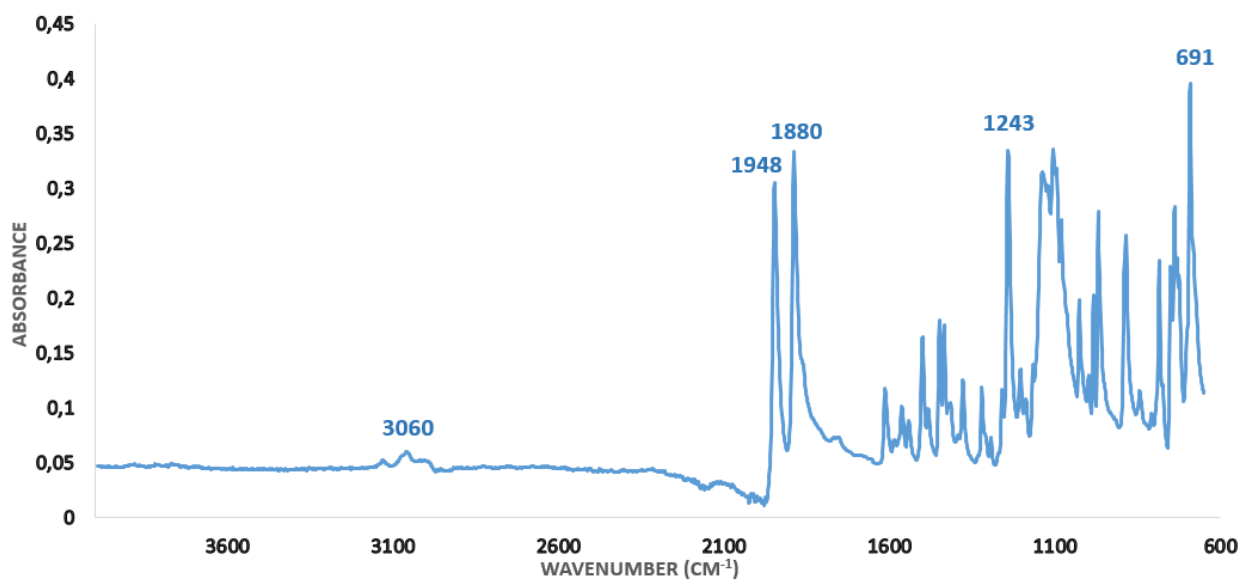

Figure S44. ATR spectrum (298K, under nitrogen) of compound 4b.

### 2.2.2. Complex 5b

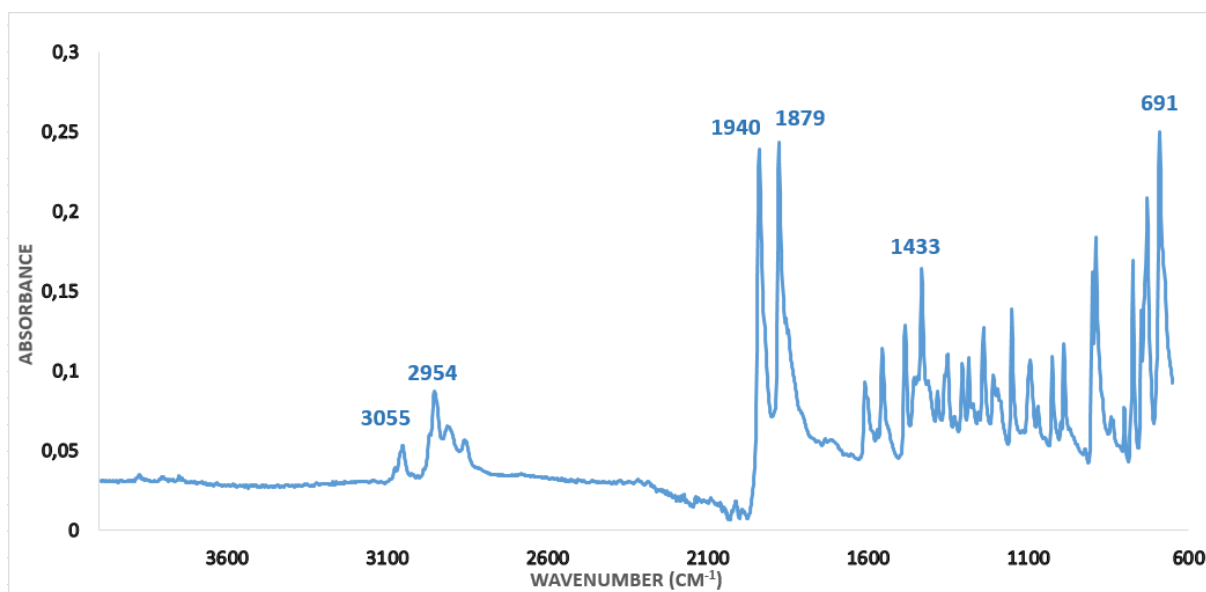

Figure S45. ATR spectrum (298K, under nitrogen) of compound 5b.

### 2.2.3. Complex 6b

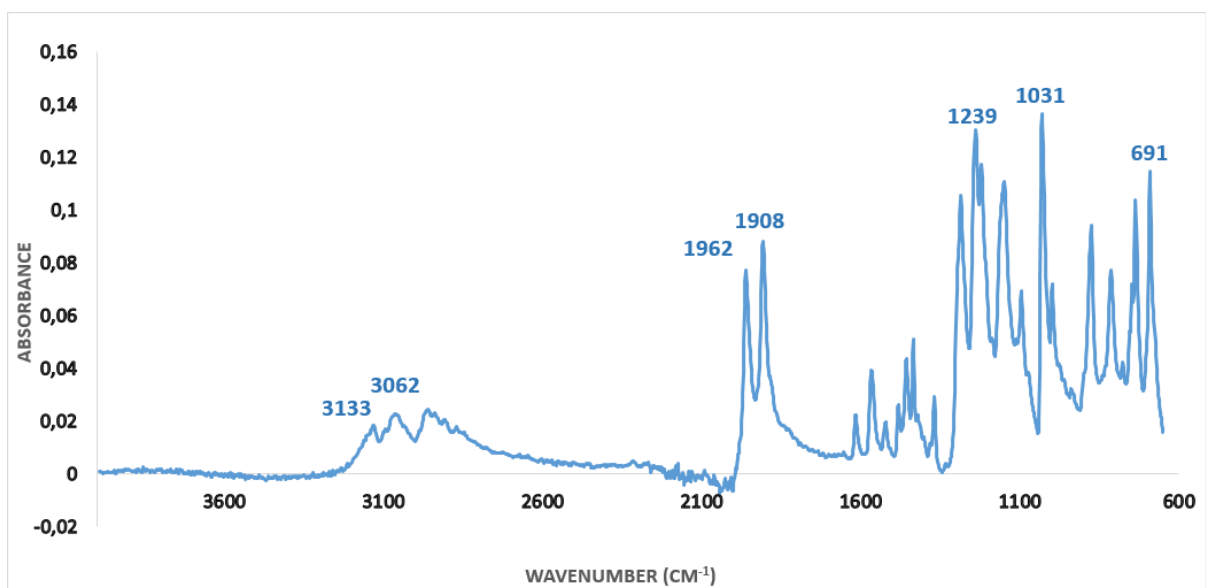

Figure S46. ATR spectrum (298K, under nitrogen) of compound 6b.

## 2.3. Compounds 4c, 5c and 6c.

### 2.3.1. Complex 4c

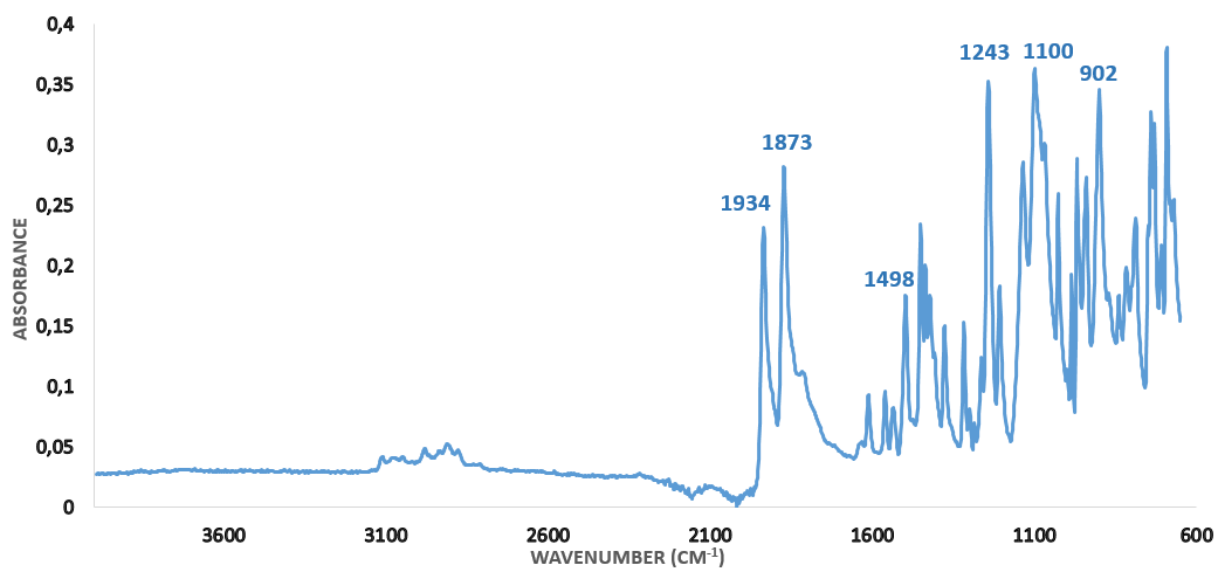

Figure S47. ATR spectrum (298K, under nitrogen) of compound 4c.

### 2.3.2. Complex 5c

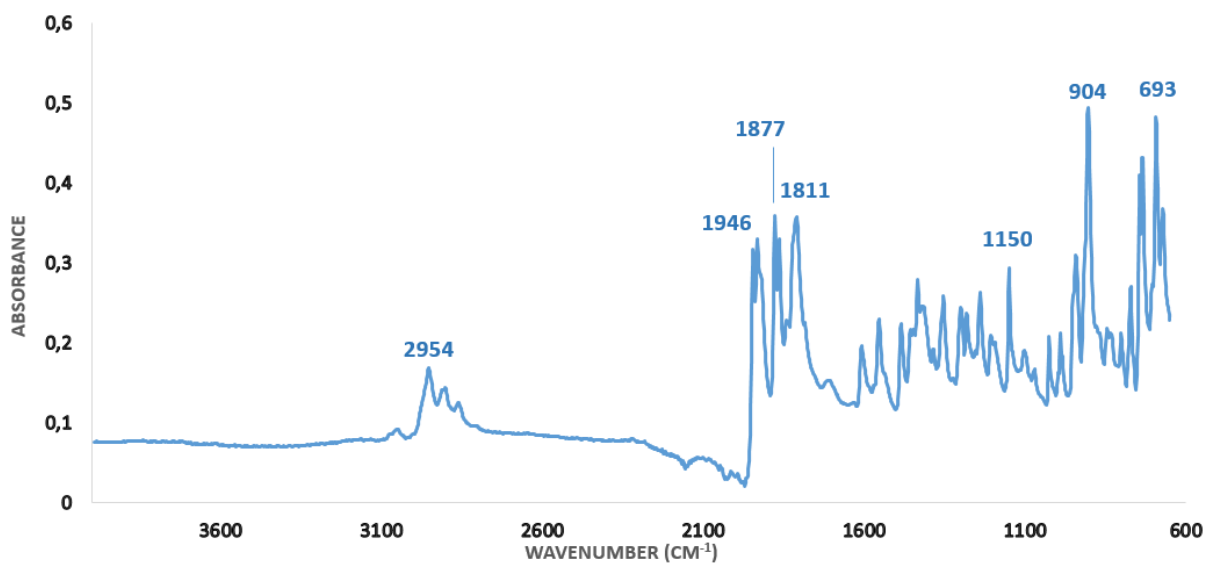

Figure S48. ATR spectrum (298K, under nitrogen) of compound 5c.

### 2.3.3. Complex 6c

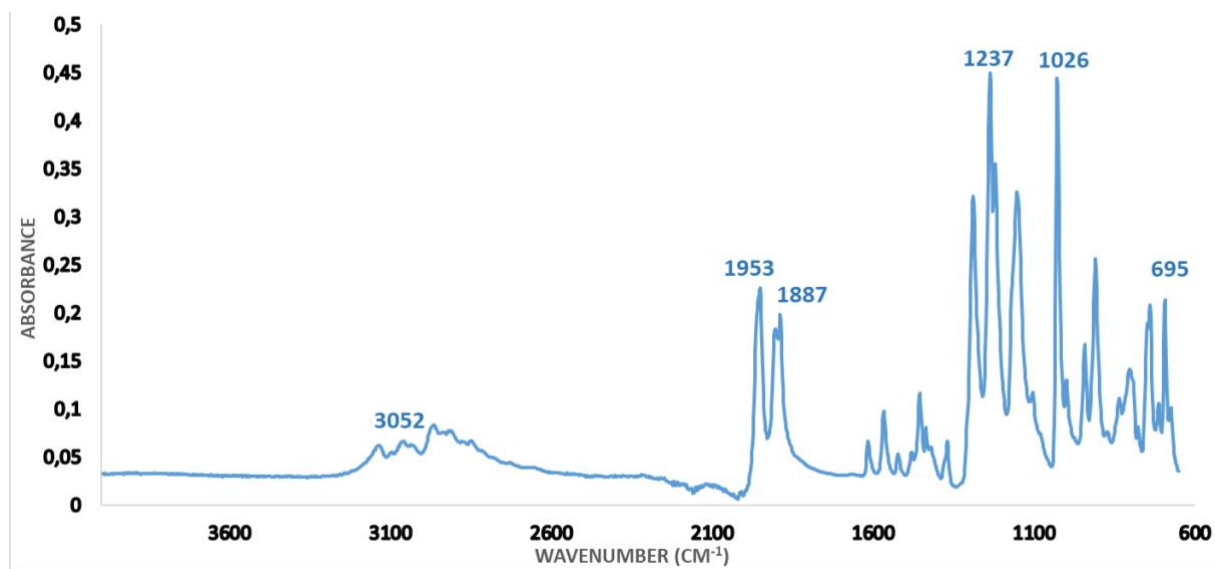

Figure S49. ATR spectrum (298K, under nitrogen) of compound 6c.

### 3. UV-Visible spectra

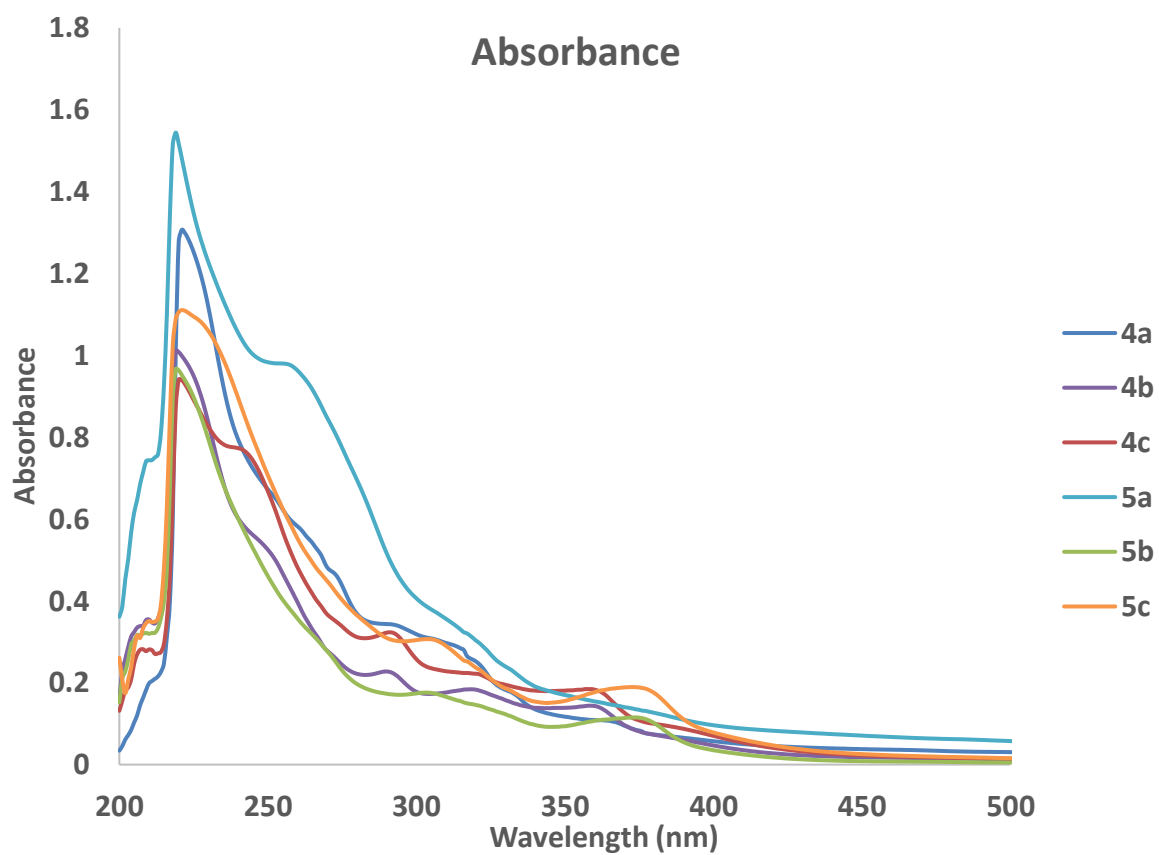

**Figure S50.** UV-Visible spectrum (298K, under air) of the heptacoordinated Mo complexes (**4a-c** and **5a-c**) stacked and centered in the UV range.

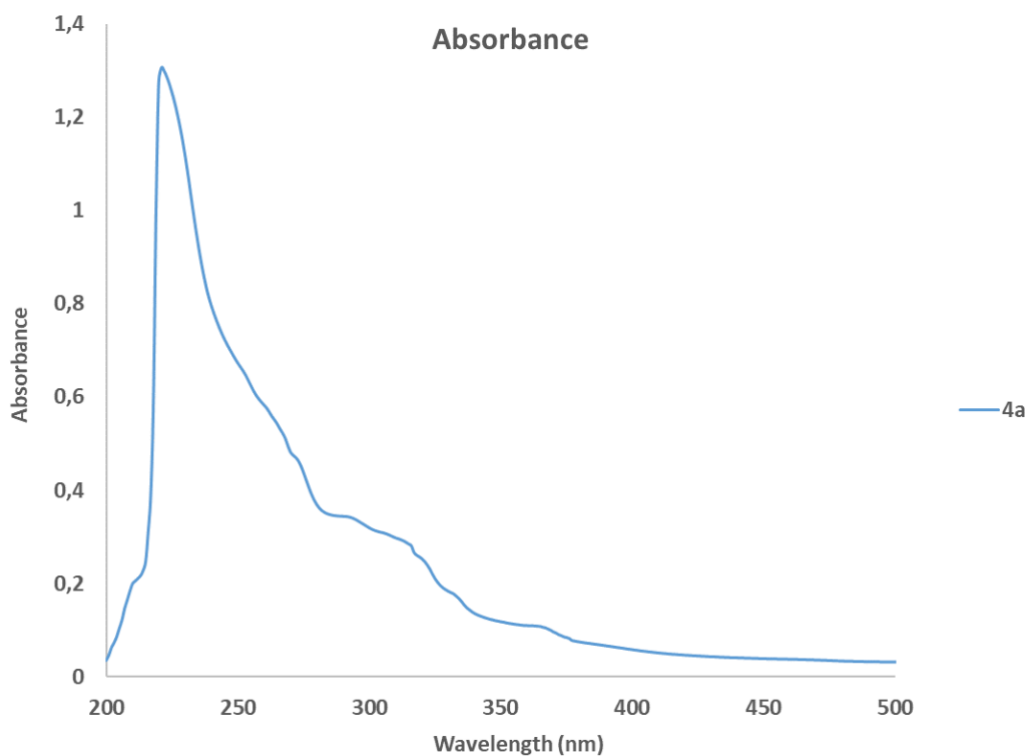

**Figure S51.** UV-Visible spectrum (298K, under air) of **4a**.  $\lambda_{\max} = 221 \text{ nm}$  ;  $\epsilon = 26726 \text{ L}\cdot\text{mol}^{-1}\cdot\text{cm}^{-1}$ , with  $A = 1.3061$  and  $C = 4.8875\cdot 10^{-5} \text{ mol}\cdot\text{L}^{-1}$ .

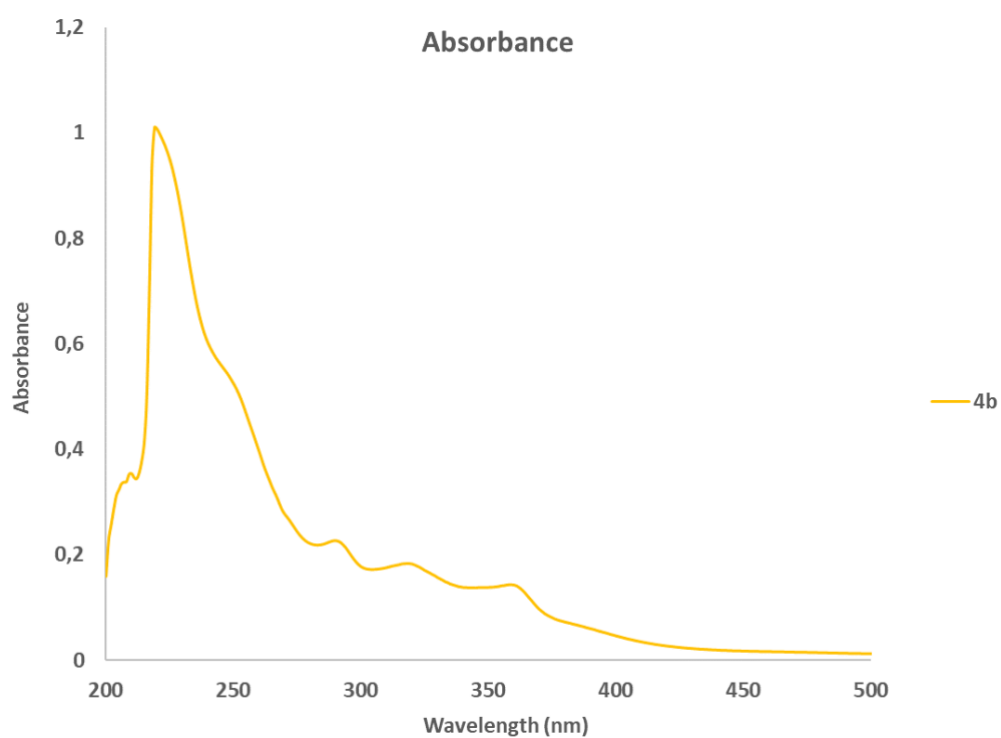

**Figure 52 :** UV-Visible spectrum (298K, under air) of **4b**.  $\lambda_{\max} = 220 \text{ nm}$ .  $\epsilon = 18181 \text{ L}\cdot\text{mol}^{-1}\cdot\text{cm}^{-1}$ , with  $A = 1.01123$  and  $C = 5.5617\cdot 10^{-5} \text{ mol}\cdot\text{L}^{-1}$ .

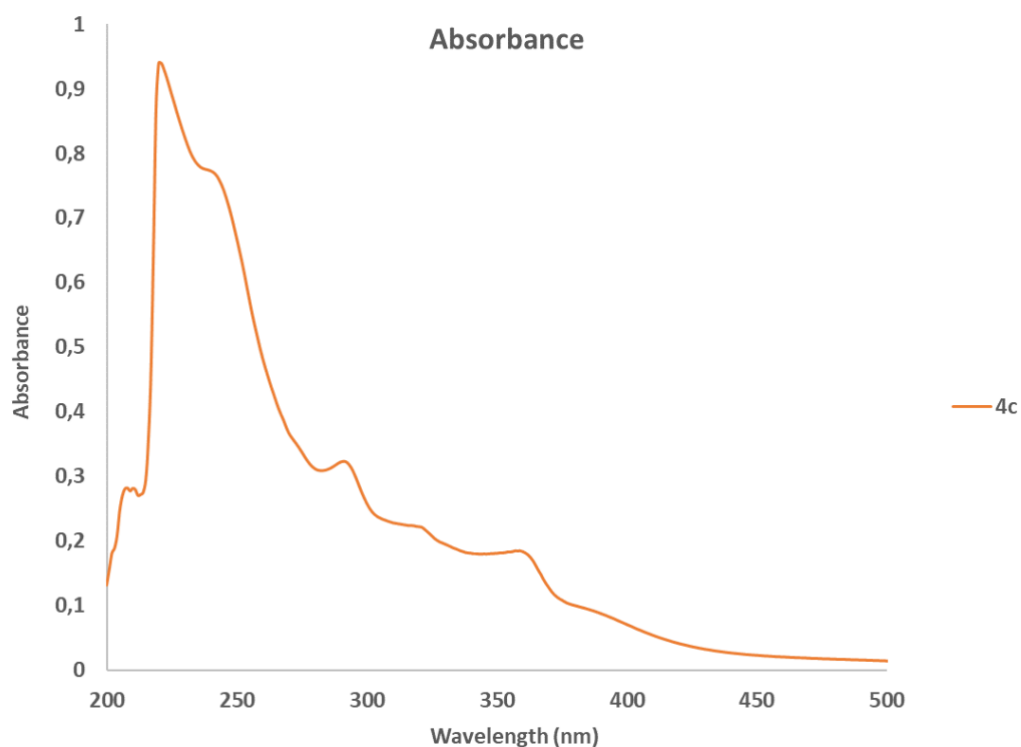

**Figure S53.** UV-Visible spectrum (298K, under air) of **4c**.  $\lambda_{\text{max}} = 220$  nm.  $\epsilon = 14577$  L·mol<sup>-1</sup>·cm<sup>-1</sup>, with  $A = 0.9405$  and  $C = 6.4516 \cdot 10^{-5}$  mol·L<sup>-1</sup>.

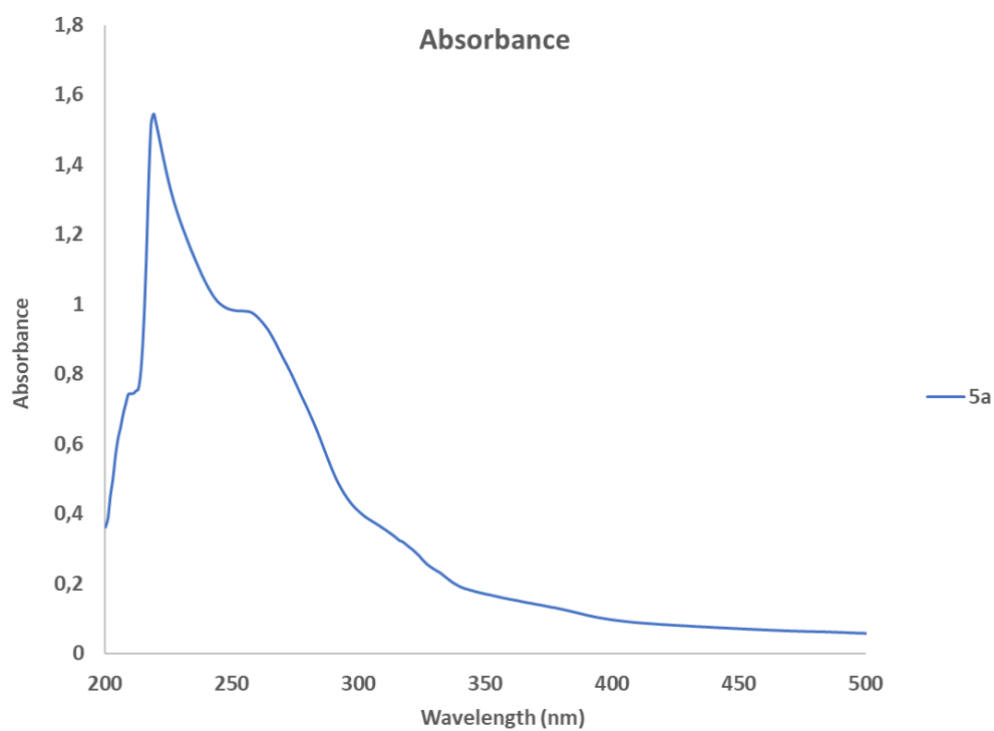

**Figure S54.** UV-Visible spectrum (298K, under air) of **5a**.  $\lambda_{\text{max}} = 219$  nm.  $\epsilon = 30851$  L·mol<sup>-1</sup>·cm<sup>-1</sup>, with  $A = 1.5441$  and  $C = 5.005 \cdot 10^{-5}$  mol·L<sup>-1</sup>.

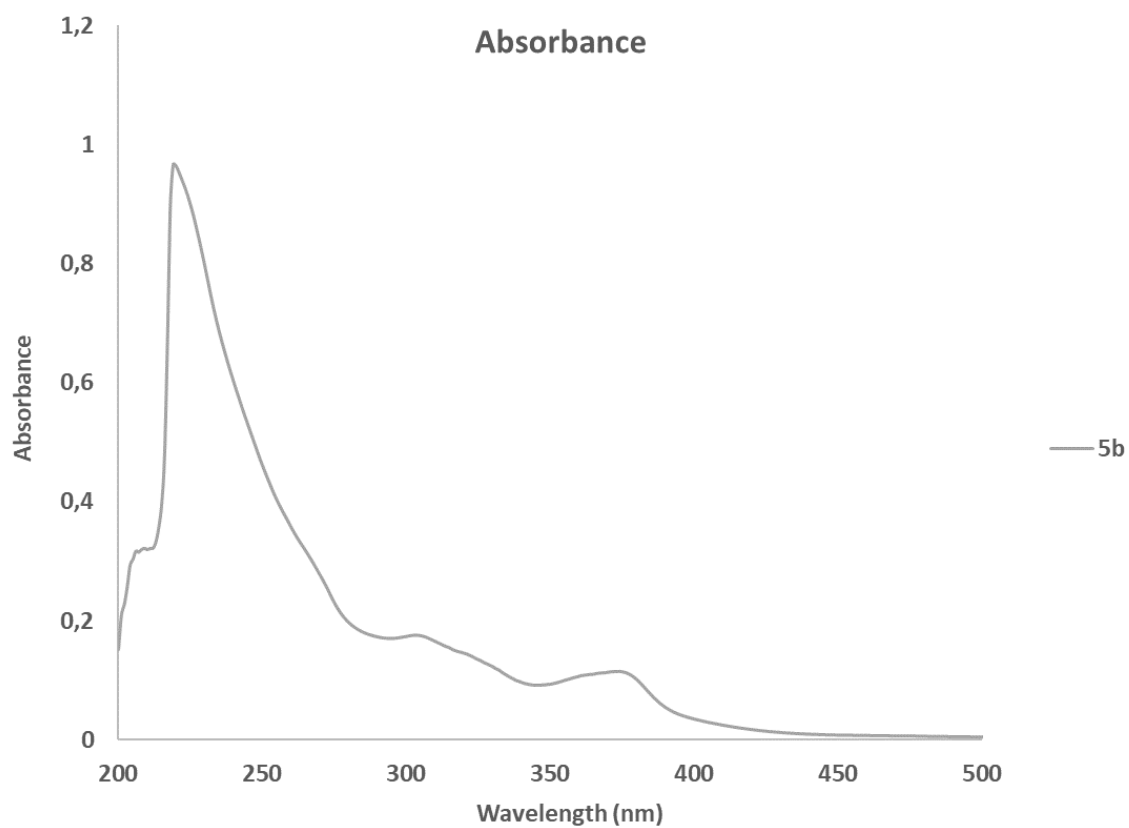

**Figure S55.** UV-Visible spectrum (298K, under air) of **5b**.  $\lambda_{\text{max}} = 220 \text{ nm}$ .  $\epsilon = 16910 \text{ L}\cdot\text{mol}^{-1}\cdot\text{cm}^{-1}$ , with  $A = 0.9663$  and  $C = 5.7142\cdot 10^{-5} \text{ mol}\cdot\text{L}^{-1}$ .



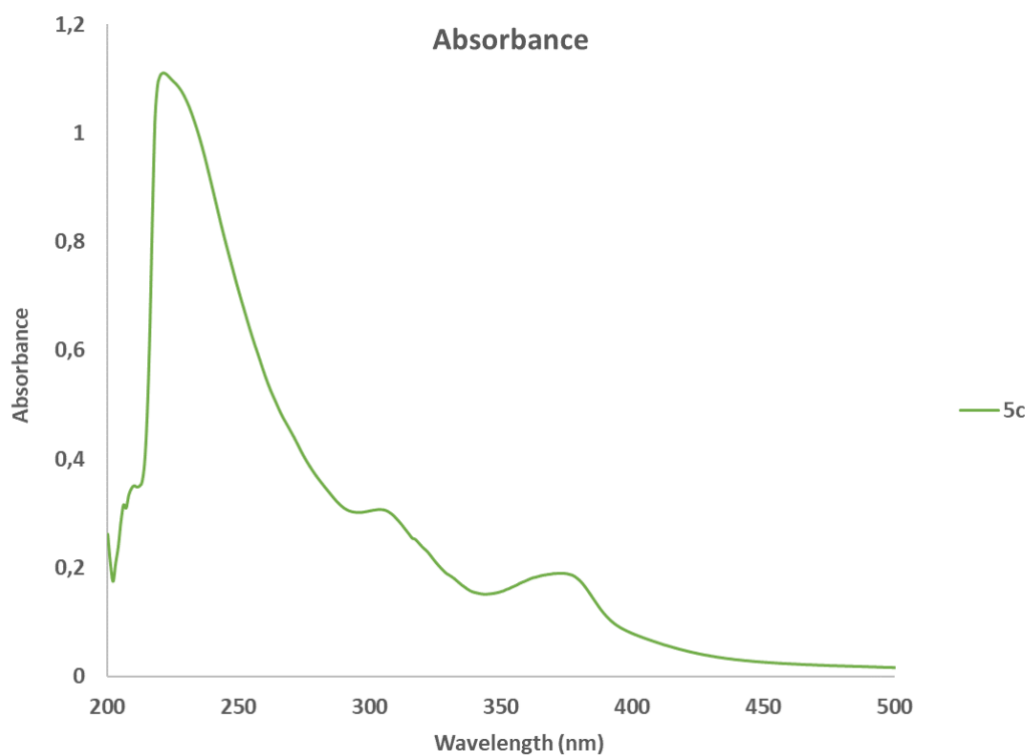

**Figure S56.** UV-Visible spectrum (298K, under air) of **5c**.  $\lambda_{\text{max}} = 221 \text{ nm}$ .  $\epsilon = 16672 \text{ L}\cdot\text{mol}^{-1}\cdot\text{cm}^{-1}$ , with  $A = 1.110$  and  $C = 6.6577\cdot 10^{-5} \text{ mol}\cdot\text{L}^{-1}$ .

## 4. Crystallographic data

Data for compounds **4a**, **4b**, **4c**, **5b**, **5c** and **6b** were collected at low temperature (100 K) on a XtaLAB Synergy, Dualflex, HyPix diffractometer using a Cu-K $\alpha$  radiation ( $\lambda = 1.54184 \text{ \AA}$ ) micro-source and equipped with an Oxford Cryosystems Cryostream Cooler Device. The structures have been solved using the new dual-space algorithm program SHELXT,<sup>1</sup> and refined by means of least-squares procedures using either SHELXL-2018<sup>1</sup> program included in the software package WinGX<sup>2</sup> version 1.639 (complexes **4b** and **5b**), or with the aid of the program CRYSTALS<sup>3</sup> (complexes **4a**, **4c**, **5c** and **6b**). The Atomic Scattering Factors were taken from International Tables for X-Ray Crystallography.<sup>4</sup> Hydrogen atoms were placed geometrically and refined using a riding model. All non-hydrogen atoms were anisotropically refined.

It was not possible to resolve diffuse electron-density residuals (enclosed solvent molecule) for the structure **6b**. Treatment with the 'SQUEEZE facility from PLATON'<sup>5</sup> resulted in a smooth refinement. Since a few low order reflections are missing from the data set, the electron count will be underestimated. Thus, the values given for D(calc), F(000) and the molecular weight are only valid for the ordered part of the structure.

Drawing of molecules in the following figures were performed with the program Mercury<sup>6</sup> with 25% probability displacement ellipsoids for non-hydrogen atoms. The crystal structures have been deposited at the Cambridge Crystallographic Data Centre and allocated the deposition numbers 2403147-2403152.

### 4.1. XRD data for compound **4a**

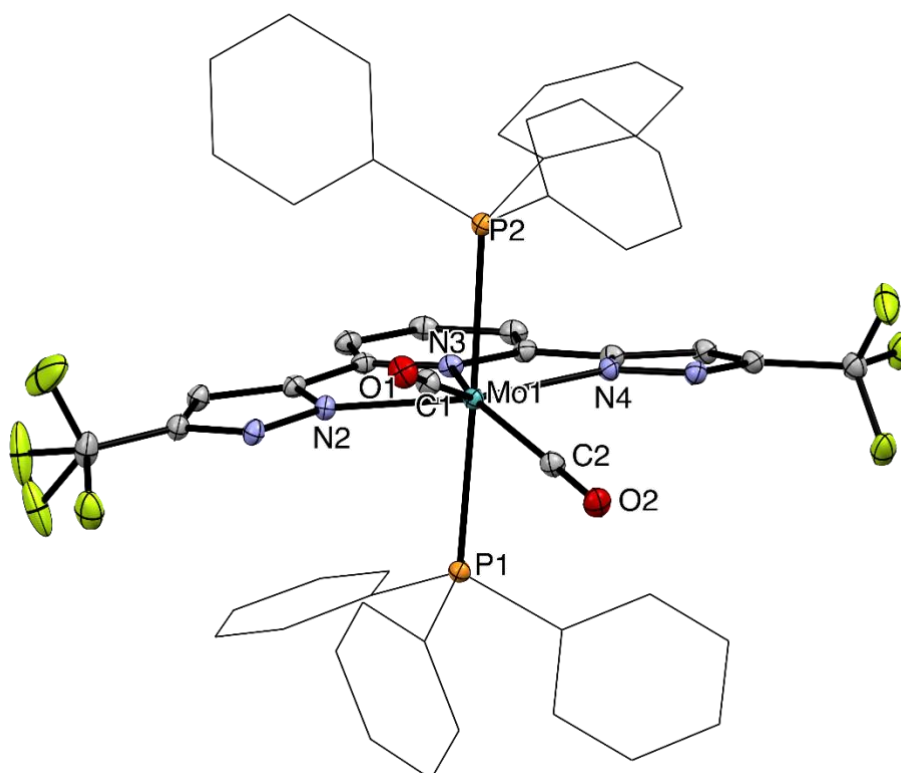

**Figure S57.** Solid-state structure of **4a** [ $\text{Mo}(\text{L}^{\text{CF}_3})(\text{PPh}_3)_2(\text{CO})_2$ ]. Ellipsoids are represented with 25% probability level. Hydrogen atoms have been omitted for clarity and phosphorus substituents appear as wireframe. Space group and selected bond distances ( $\text{\AA}$ ):  $\text{P}2_1/n$ ; Mo-N2 2.177(2), Mo-N3 2.206(2), Mo-N4 2.182(2), Mo-P1 2.5711(6), Mo-P2 2.5442(6), Mo-C1 1.991(2), Mo-C2 1.986(2), C1-O1 1.137(3), C2-O2 1.149(3). One of the  $\text{CF}_3$  groups of **4a** presents disorder.

*Crystal data*

|                                 |                                                         |
|---------------------------------|---------------------------------------------------------|
| $C_{51}H_{35}F_6MoN_5O_2P_2$    | $F(000) = 2072$                                         |
| $M_r = 1021.75$                 | $D_x = 1.508 \text{ Mg m}^{-3}$                         |
| Monoclinic, $P2_1/n$            |                                                         |
| Hall symbol: -P 2yn             | Cu $K\alpha$ radiation, $\lambda = 1.54184 \text{ \AA}$ |
| $a = 13.61346 (7) \text{ \AA}$  | Cell parameters from 70105 reflections                  |
| $b = 19.90355 (10) \text{ \AA}$ | $\theta = 3.8\text{--}79.7^\circ$                       |
| $c = 16.96940 (8) \text{ \AA}$  | $\mu = 3.68 \text{ mm}^{-1}$                            |
| $\beta = 101.8476 (5)^\circ$    | $T = 100 \text{ K}$                                     |
| $V = 4500.01 (4) \text{ \AA}^3$ | Block, red                                              |
| $Z = 4$                         | $0.20 \times 0.15 \times 0.08 \text{ mm}$               |

### Data collection

|                                                                               |                                                                        |
|-------------------------------------------------------------------------------|------------------------------------------------------------------------|
| XtaLAB Synergy, Dualflex, HyPix diffractometer                                | 9775 independent reflections                                           |
| Radiation source: micro-focus sealed X-ray tube, PhotonJet (Cu) X-ray Source  | 9404 reflections with $I > 2.0\sigma(I)$                               |
| Mirror monochromator                                                          | $R_{\text{int}} = 0.047$                                               |
| Detector resolution: $10.0000 \text{ pixels mm}^{-1}$                         | $\theta_{\text{max}} = 80.5^\circ$ , $\theta_{\text{min}} = 3.5^\circ$ |
| $\phi$ & $\omega$ scans                                                       | $h = -16 \ 17$                                                         |
| Absorption correction: multi-scan CrysAlisPro 1.171.42.102a (Rigaku OD, 2023) | $k = -20 \ 25$                                                         |
| $T_{\text{min}} = 0.43$ , $T_{\text{max}} = 0.74$                             | $l = -21 \ 21$                                                         |
| 106885 measured reflections                                                   |                                                                        |

### Refinement

|                                             |                                                                                                                                               |
|---------------------------------------------|-----------------------------------------------------------------------------------------------------------------------------------------------|
| Refinement on $F^2$                         |                                                                                                                                               |
| Least-squares matrix: <u>full</u>           | Hydrogen site location: <u>difference Fourier map</u>                                                                                         |
| $R[F^2 > 2\sigma(F^2)] = \underline{0.041}$ | <u>H-atom parameters not refined</u>                                                                                                          |
| $wR(F^2) = \underline{0.118}$               | <u>Method = Modified Sheldrick <math>w = 1/[\sigma^2(F^2) + (0.08P)^2 + 6.17P]</math>, where <math>P = (\max(F_o^2, 0) + 2F_c^2)/3</math></u> |
| $S = \underline{0.99}$                      | $(\Delta/\sigma)_{\text{max}} = \underline{0.002}$                                                                                            |
| <u>9775</u> reflections                     | $\Delta\rho_{\text{max}} = \underline{0.86} \text{ e \AA}^{-3}$                                                                               |
| <u>613</u> parameters                       | $\Delta\rho_{\text{min}} = \underline{-1.45} \text{ e \AA}^{-3}$                                                                              |
| <u>7</u> restraints                         | Extinction correction: <u>None</u>                                                                                                            |

## 4.2. XRD data for compound 4b

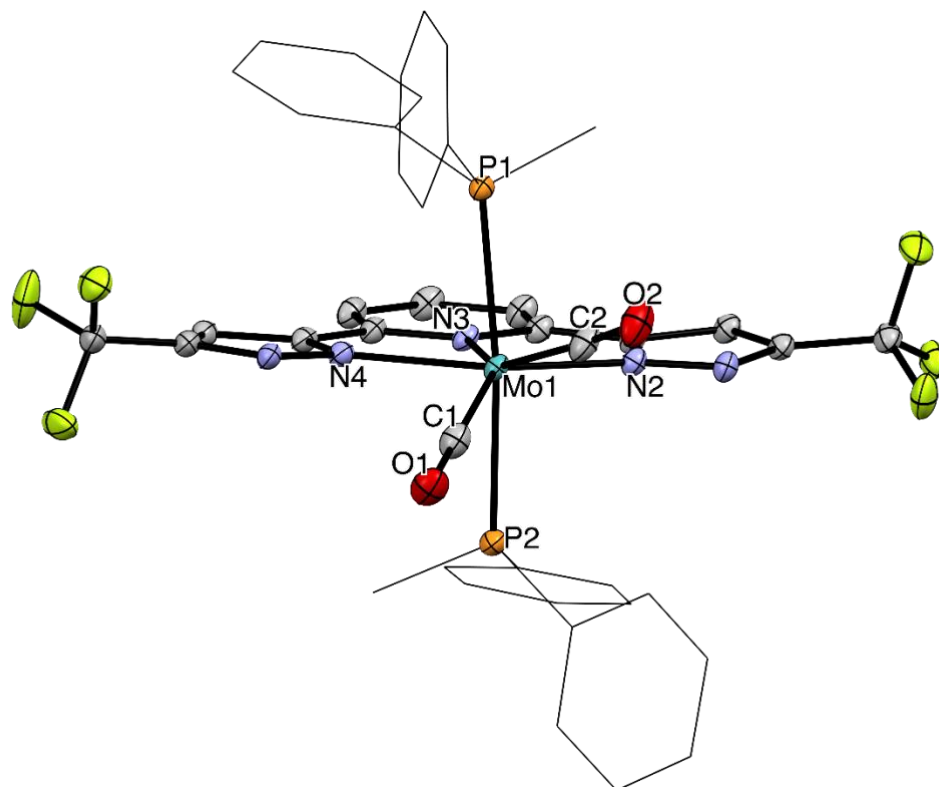

**Figure S58.** Solid-state structure of **4b** [Mo(L<sup>CF<sub>3</sub></sup>)(PPh<sub>2</sub>Me)<sub>2</sub>(CO)<sub>2</sub>]. Ellipsoids are represented with 25% probability level. Hydrogen atoms have been omitted for clarity and phosphorus substituents appear as wireframe. Space group and selected bond distances (Å): P2<sub>1</sub>/n; Mo-N2 2.171(2), Mo-N3 2.200(2), Mo-N4 2.162(2), Mo-P1 2.5131(8), Mo-P2 2.5226(8), Mo-C1 1.974(3), Mo-C2 1.979(3), C1-O1 1.159(3), C2-O2 1.168(4).

### Crystal data

|                                                                                               |                                                         |
|-----------------------------------------------------------------------------------------------|---------------------------------------------------------|
| C <sub>41</sub> H <sub>31</sub> F <sub>6</sub> MoN <sub>5</sub> O <sub>2</sub> P <sub>2</sub> | $F(000) = 1816$                                         |
| $M_r = 897.59$                                                                                | $D_x = 1.554 \text{ Mg m}^{-3}$                         |
| Monoclinic, $P2_1/n$                                                                          |                                                         |
| Hall symbol: $-P 2_1/n$                                                                       | Cu $K\alpha$ radiation, $\lambda = 1.54184 \text{ \AA}$ |
| $a = 13.8694 (2) \text{ \AA}$                                                                 | Cell parameters from 38057 reflections                  |
| $b = 17.5030 (2) \text{ \AA}$                                                                 | $\theta = 3.7\text{--}79.5^\circ$                       |
| $c = 16.2883 (2) \text{ \AA}$                                                                 | $\mu = 4.22 \text{ mm}^{-1}$                            |
| $\beta = 103.927 (1)^\circ$                                                                   | $T = 100 \text{ K}$                                     |
| $V = 3837.85 (9) \text{ \AA}^3$                                                               | Parallelepiped, orange                                  |
| $Z = 4$                                                                                       | $0.10 \times 0.05 \times 0.02 \text{ mm}$               |

Data collection

|                                                                                                                                                                                                                  |                                                                                                                                                                                    |
|------------------------------------------------------------------------------------------------------------------------------------------------------------------------------------------------------------------|------------------------------------------------------------------------------------------------------------------------------------------------------------------------------------|
| XtaLAB Synergy, Dualflex, HyPix diffractometer                                                                                                                                                                   | <u>7276</u> independent reflections                                                                                                                                                |
| Radiation source: <u>micro-focus sealed X-ray tube, PhotonJet (Cu) X-ray Source</u>                                                                                                                              | <u>6704</u> reflections with $I > 2\sigma(I)$                                                                                                                                      |
| <u>Mirror monochromator</u>                                                                                                                                                                                      | $R_{\text{int}} = \underline{0.048}$                                                                                                                                               |
| Detector resolution: <u>10.0000</u> pixels $\text{mm}^{-1}$                                                                                                                                                      | $\theta_{\text{max}} = \underline{70.1}^\circ$ , $\theta_{\text{min}} = \underline{3.8}^\circ$<br>$h = \underline{-15}$ $\underline{16}$<br>$k = \underline{-20}$ $\underline{21}$ |
| Absorption correction: <u>multi-scan CrysAlisPro 1.171.41.120a (Rigaku Oxford Diffraction, 2021) Empirical absorption correction using spherical harmonics, implemented in SCALE3 ABSPACK scaling algorithm.</u> |                                                                                                                                                                                    |
| $T_{\text{min}} = \underline{0.817}$ , $T_{\text{max}} = \underline{1.000}$                                                                                                                                      | $l = \underline{-19}$ $\underline{19}$                                                                                                                                             |
| <u>64919</u> measured reflections                                                                                                                                                                                |                                                                                                                                                                                    |

Refinement

|                                             |                                                                                     |
|---------------------------------------------|-------------------------------------------------------------------------------------|
| Refinement on $F^2$                         |                                                                                     |
| Least-squares matrix: <u>full</u>           | Hydrogen site location: <u>inferred from neighbouring sites</u>                     |
| $R[F^2 > 2\sigma(F^2)] = \underline{0.035}$ | <u>H-atom parameters constrained</u>                                                |
| $wR(F^2) = \underline{0.092}$               | $w = 1/[\sigma^2(F_o^2) + (0.0512P)^2 + 4.1491P]$<br>where $P = (F_o^2 + 2F_c^2)/3$ |
| $S = \underline{1.03}$                      | $(\Delta/\sigma)_{\text{max}} = \underline{0.002}$                                  |
| <u>7276</u> reflections                     | $\Delta\rho_{\text{max}} = \underline{0.71} \text{ e } \text{\AA}^{-3}$             |
| <u>516</u> parameters                       | $\Delta\rho_{\text{min}} = \underline{-0.87} \text{ e } \text{\AA}^{-3}$            |
| <u>0</u> restraints                         | Extinction correction: <u>none</u>                                                  |

### 4.3. XRD data for compound 5b

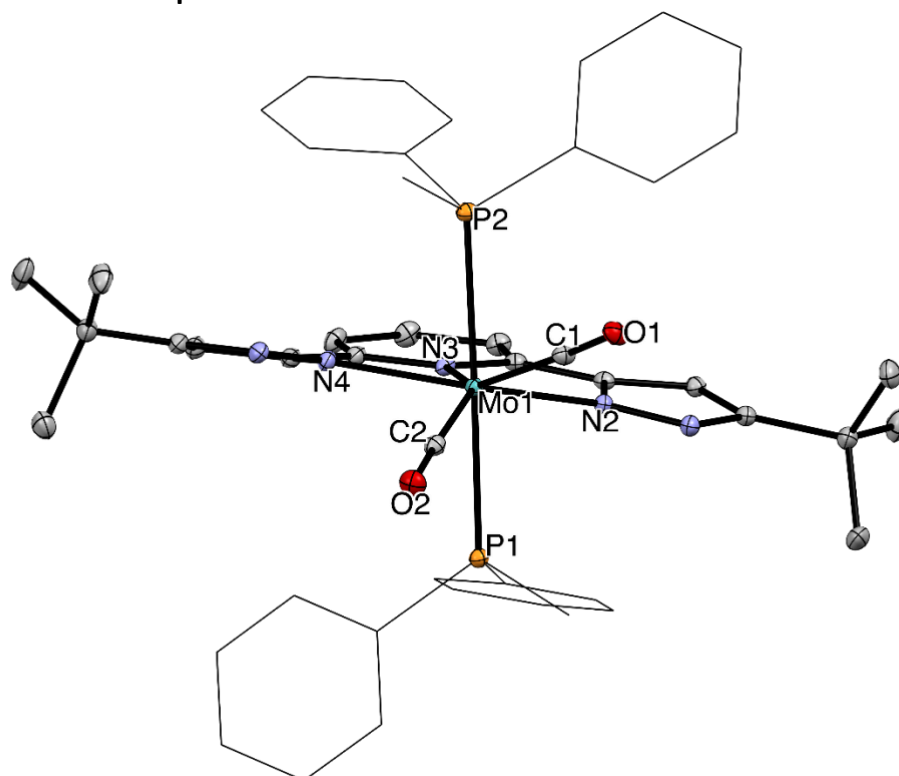

**Figure S59.** Solid-state structure of **5b** [Mo(L<sup>tBu</sup>)(PPh<sub>2</sub>Me)<sub>2</sub>(CO)<sub>2</sub>]. Ellipsoids are represented with 25% probability level. Hydrogen atoms have been omitted for clarity and phosphorus substituents appear as wireframe. Two molecules are present in the asymmetric unit of this crystal ( $Z' = 2$ ), only one is represented. Space group and selected bond distances (Å): *Pbca*; Mo-N2 2.173(1), Mo-N3 2.190(1), Mo-N4 2.168(1), Mo-P1 2.5218(7), Mo-P2 2.5372(7), Mo-C1 1.963(2), Mo-C2 1.980(2), C1-O1 1.152(2), C2-O2 1.147(2).

#### Crystal data

|                                  |                                                         |
|----------------------------------|---------------------------------------------------------|
| $C_{47}H_{49}MoN_5O_2P_2$        | $F(000) = 3632$                                         |
| $M_r = 873.83$                   | $D_x = 1.357 \text{ Mg m}^{-3}$                         |
| Orthorhombic, <i>Pbca</i>        | Cu $K\alpha$ radiation, $\lambda = 1.54184 \text{ \AA}$ |
| Hall symbol: -P 2ac 2ab          | Cell parameters from 92810 reflections                  |
| $a = 12.7581 (1) \text{ \AA}$    | $\theta = 3.0\text{--}79.8^\circ$                       |
| $b = 22.8235 (2) \text{ \AA}$    | $\mu = 3.56 \text{ mm}^{-1}$                            |
| $c = 29.3695 (2) \text{ \AA}$    | $T = 100 \text{ K}$                                     |
| $V = 8551.94 (12) \text{ \AA}^3$ | Bloc, red                                               |
| $Z = 8$                          | $0.12 \times 0.08 \times 0.04 \text{ mm}$               |

#### Data collection

|                                                                              |                                        |
|------------------------------------------------------------------------------|----------------------------------------|
| XtaLAB Synergy, Dualflex, HyPix diffractometer                               | 9313 independent reflections           |
| Radiation source: micro-focus sealed X-ray tube, PhotonJet (Cu) X-ray Source | 8980 reflections with $I > 2\sigma(I)$ |
| Mirror monochromator                                                         | $R_{\text{int}} = 0.045$               |

|                                                                                                                                                                                                                          |                                                            |
|--------------------------------------------------------------------------------------------------------------------------------------------------------------------------------------------------------------------------|------------------------------------------------------------|
| Detector resolution: 10.0000 pixels mm <sup>-1</sup>                                                                                                                                                                     | $\theta_{\max} = 80.1^\circ$ , $\theta_{\min} = 3.0^\circ$ |
|                                                                                                                                                                                                                          | $h = -14 \ 16$                                             |
| Absorption correction: multi-scan<br>CrysAlisPro 1.171.41.120a (Rigaku Oxford<br>Diffraction, 2021) Empirical absorption<br>correction using spherical harmonics,<br>implemented in SCALE3 ABSPACK scaling<br>algorithm. | $k = -29 \ 29$                                             |
| $T_{\min} = 0.822$ , $T_{\max} = 1.000$                                                                                                                                                                                  | $l = -32 \ 37$                                             |
| 147625 measured reflections                                                                                                                                                                                              |                                                            |

### Refinement

|                                 |                                                                                    |
|---------------------------------|------------------------------------------------------------------------------------|
| Refinement on $F^2$             |                                                                                    |
| Least-squares matrix: full      | Hydrogen site location: inferred from<br>neighbouring sites                        |
| $R[F^2 > 2\sigma(F^2)] = 0.028$ | H-atom parameters constrained                                                      |
| $wR(F^2) = 0.077$               | $w = 1/[\sigma^2(F_o^2) + (0.0431P)^2 + 5.656P]$<br>where $P = (F_o^2 + 2F_c^2)/3$ |
| $S = 1.08$                      | $(\Delta/\sigma)_{\max} = 0.003$                                                   |
| 9313 reflections                | $\Delta\rho_{\max} = 0.43 \text{ e } \text{\AA}^{-3}$                              |
| 522 parameters                  | $\Delta\rho_{\min} = -0.69 \text{ e } \text{\AA}^{-3}$                             |
| 0 restraints                    | Extinction correction: none                                                        |

### 4.4. XRD data for compound 6b

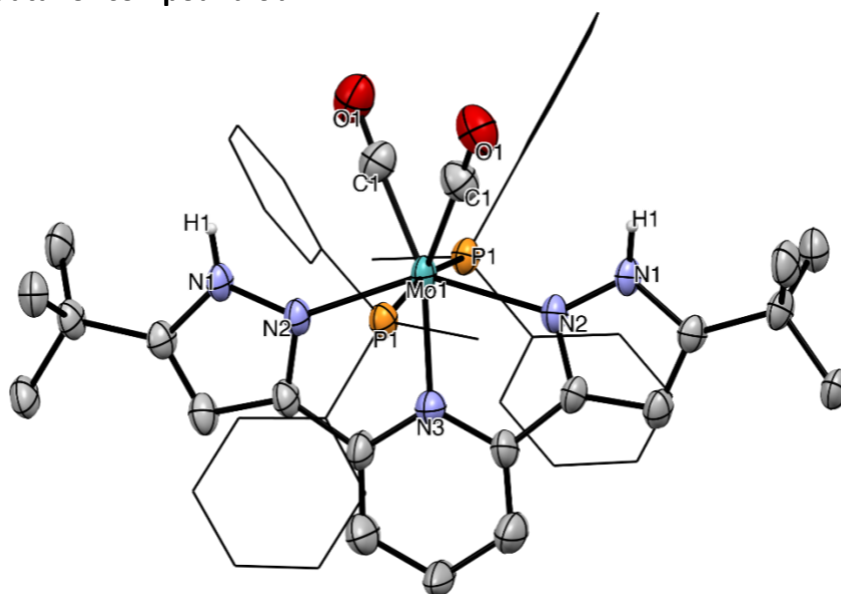

**Figure S60.** Solid-state structure of **6b**  $[(\text{Mo}(\text{H}_2\text{L}^{\text{tBu}})(\text{PPh}_2\text{Me})_2(\text{CO})_2)^{2+} (2 \text{ OTf})]$ . Solid-state structure of **4b**  $[\text{Mo}(\text{L}^{\text{CF}_3})(\text{PPh}_2\text{Me})_2(\text{CO})_2]$ . Ellipsoids are represented with 25% probability level. Hydrogen atoms have been omitted for clarity (except the N(pyrazol)-H bonds) and phosphorus substituents appear as wireframe. The metrics are not usable because of the non-sufficient quality of the crystal.

### Crystal data

|                                             |                                                         |
|---------------------------------------------|---------------------------------------------------------|
| $C_{47}H_{51}MoN_5O_2P_2 \cdot 2(CF_3O_3S)$ |                                                         |
| $M_r = 1173.98$                             | $D_x = 1.361 \text{ Mg m}^{-3}$                         |
| Monoclinic, $C2/c$                          |                                                         |
| Hall symbol: $-C 2yc$                       | Cu $K\alpha$ radiation, $\lambda = 1.54184 \text{ \AA}$ |
| $a = 22.4003 (7) \text{ \AA}$               | Cell parameters from 22700 reflections                  |
| $b = 10.8477 (5) \text{ \AA}$               | $\theta = 3.8\text{--}74.6^\circ$                       |
| $c = 23.697 (1) \text{ \AA}$                | $\mu = 3.70 \text{ mm}^{-1}$                            |
| $\beta = 95.741 (3)^\circ$                  | $T = 100 \text{ K}$                                     |
| $V = 5729.3 (4) \text{ \AA}^3$              | Parallelepiped, yellow                                  |
| $Z = 4$                                     | $0.20 \times 0.07 \times 0.03 \text{ mm}$               |
| $F(000) = 2408$                             |                                                         |

### Data collection

|                                                                               |                                                                        |
|-------------------------------------------------------------------------------|------------------------------------------------------------------------|
| XtaLAB Synergy, Dualflex, HyPix diffractometer                                | 5995 independent reflections                                           |
| Radiation source: micro-focus sealed X-ray tube, PhotonJet (Cu) X-ray Source  | 3335 reflections with $I > 2.0\sigma(I)$                               |
| Mirror monochromator                                                          | $R_{\text{int}} = 0.151$                                               |
| Detector resolution: $10.0000 \text{ pixels mm}^{-1}$                         | $\theta_{\text{max}} = 57.6^\circ$ , $\theta_{\text{min}} = 3.8^\circ$ |
| $\phi$ & $\omega$ scans                                                       | $h = -28 \text{ } 25$                                                  |
| Absorption correction: multi-scan CrysAlisPro 1.171.42.102a (Rigaku OD, 2023) | $k = -13 \text{ } 13$                                                  |
| $T_{\text{min}} = 0.46$ , $T_{\text{max}} = 0.89$                             | $l = -29 \text{ } 30$                                                  |
| 81801 measured reflections                                                    |                                                                        |

### Refinement

|                                 |                                                                                                                    |
|---------------------------------|--------------------------------------------------------------------------------------------------------------------|
| Refinement on $F^2$             |                                                                                                                    |
| Least-squares matrix: full      | Hydrogen site location: difference Fourier map                                                                     |
| $R[F^2 > 2\sigma(F^2)] = 0.103$ | H atoms treated by a mixture of independent and constrained refinement                                             |
| $wR(F^2) = 0.312$               | Method = Modified Sheldrick $w = 1/[\sigma^2(F^2) + (0.2P)^2 + 0.0P]$ ,<br>where $P = (\max(F_o^2, 0) + 2F_c^2)/3$ |
| $S = 1.42$                      | $(\Delta/\sigma)_{\text{max}} = 0.001$                                                                             |
| 3919 reflections                | $\Delta\rho_{\text{max}} = 2.37 \text{ e \AA}^{-3}$                                                                |
| 335 parameters                  | $\Delta\rho_{\text{min}} = -0.89 \text{ e \AA}^{-3}$                                                               |
| 4 restraints                    | Extinction correction: None                                                                                        |



#### 4.5. XRD data for compound 4c

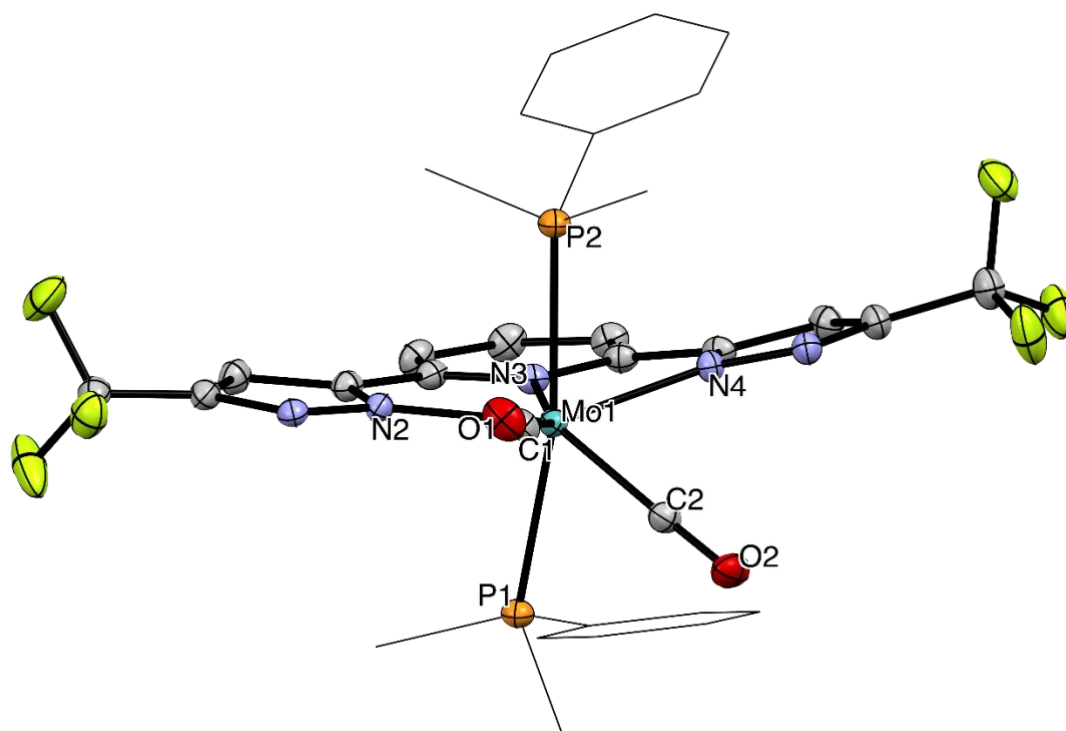

**Figure S61.** Solide-state structure of **4c** [Mo(L<sup>CF<sub>3</sub></sup>)(PPhMe<sub>2</sub>)<sub>2</sub>(CO)<sub>2</sub>]. Ellipsoids are represented with 25% probability level. Hydrogen atoms have been omitted for clarity and phosphorus substituents appear as wireframe. Space group and selected bond distances (Å): *P*2<sub>1</sub>/*c*; Mo-N2 2.178(2), Mo-N3 2.192(2), Mo-N4 2.180(2), Mo-P1 2.5540(7), Mo-P2 2.5190(7), Mo-C1 1.970(3), Mo-C2 1.971(3), C1-O1 1.144(4), C2-O2 1.151(4)

#### Crystal data

|                                                                                                                                |                                                 |
|--------------------------------------------------------------------------------------------------------------------------------|-------------------------------------------------|
| C <sub>31</sub> H <sub>27</sub> F <sub>6</sub> MoN <sub>5</sub> O <sub>2</sub> P <sub>2</sub> ·C <sub>4</sub> H <sub>8</sub> O | <i>F</i> (000) = 1720                           |
| <i>M<sub>r</sub></i> = 845.57                                                                                                  | <i>D<sub>x</sub></i> = 1.521 Mg m <sup>-3</sup> |
| Monoclinic, <i>P</i> 2 <sub>1</sub> / <i>c</i>                                                                                 |                                                 |
| Hall symbol: - <i>P</i> 2ybc                                                                                                   | Cu Kα radiation, λ = 1.54184 Å                  |
| <i>a</i> = 18.27310 (11) Å                                                                                                     | Cell parameters from 38640 reflections          |
| <i>b</i> = 10.97842 (8) Å                                                                                                      | θ = 4.6–78.9°                                   |
| <i>c</i> = 18.42521 (12) Å                                                                                                     | μ = 4.36 mm <sup>-1</sup>                       |
| β = 92.3005 (6)°                                                                                                               | <i>T</i> = 100 K                                |
| <i>V</i> = 3693.30 (4) Å <sup>3</sup>                                                                                          | Platelet, yellow                                |
| <i>Z</i> = 4                                                                                                                   | 0.15 × 0.10 × 0.02 mm                           |

#### Data collection

|                                                                              |                                                   |
|------------------------------------------------------------------------------|---------------------------------------------------|
| XtaLAB Synergy, Dualflex, HyPix diffractometer                               | 7972 independent reflections                      |
| Radiation source: micro-focus sealed X-ray tube, PhotonJet (Cu) X-ray Source | 7295 reflections with <i>I</i> > 2.0σ( <i>I</i> ) |
| Mirror monochromator                                                         | <i>R</i> <sub>int</sub> = 0.059                   |

|                                                                                     |                                                            |
|-------------------------------------------------------------------------------------|------------------------------------------------------------|
| Detector resolution: 10.0000 pixels mm <sup>-1</sup>                                | $\theta_{\max} = 80.5^\circ$ , $\theta_{\min} = 4.7^\circ$ |
| $\omega/2\theta$ scans                                                              | $h = -23 \ 23$                                             |
| Absorption correction: multi-scan<br>CrysAlisPro 1.171.42.102a (Rigaku OD,<br>2023) | $k = -13 \ 10$                                             |
| $T_{\min} = 0.50$ , $T_{\max} = 0.92$                                               | $l = -22 \ 23$                                             |
| 70434 measured reflections                                                          |                                                            |

### Refinement

|                                 |                                                                                                                      |
|---------------------------------|----------------------------------------------------------------------------------------------------------------------|
| Refinement on $F^2$             |                                                                                                                      |
| Least-squares matrix: full      | Hydrogen site location: difference Fourier map                                                                       |
| $R[F^2 > 2\sigma(F^2)] = 0.041$ | H-atom parameters not refined                                                                                        |
| $wR(F^2) = 0.120$               | Method = Modified Sheldrick $w = 1/[\sigma^2(F^2) + (0.09P)^2 + 3.76P]$ ,<br>where $P = (\max(F_o^2, 0) + 2F_c^2)/3$ |
| $S = 0.95$                      | $(\Delta/\sigma)_{\max} = 0.001$                                                                                     |
| 7972 reflections                | $\Delta\rho_{\max} = 0.65 \text{ e } \text{\AA}^{-3}$                                                                |
| 469 parameters                  | $\Delta\rho_{\min} = -1.09 \text{ e } \text{\AA}^{-3}$                                                               |
| 0 restraints                    | Extinction correction: None                                                                                          |

### 4.6. XRD data for compound 5c

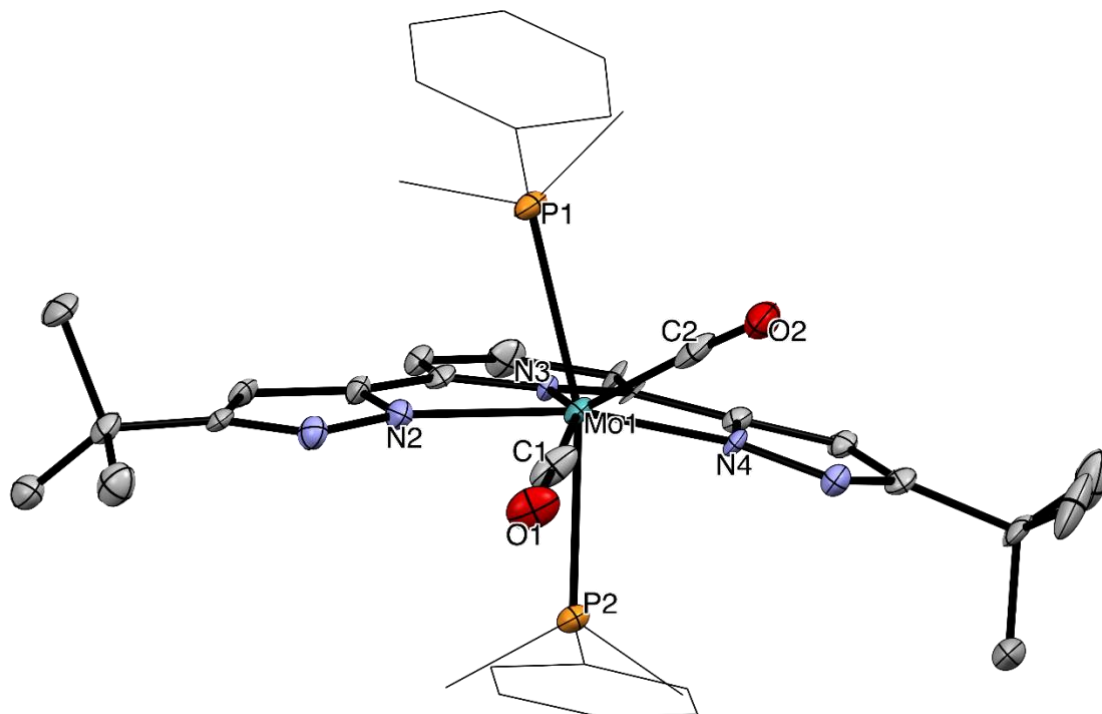

**Figure S62.** Solide-state structure of **5c** [Mo(L<sup>tBu</sup>)(PPhMe<sub>2</sub>)<sub>2</sub>(CO)<sub>2</sub>]. Ellipsoids are represented with 25% probability level. Hydrogen atoms have been omitted for clarity and phosphorus substituents appear as wireframe. The metrics are not usable because of the non-sufficient quality of the crystal.

### Crystal data

|                                |                                                         |
|--------------------------------|---------------------------------------------------------|
| $C_{74}H_{90}Mo_2N_{10}O_4P_4$ | $F(000) = 1560$                                         |
| $M_r = 1499.37$                |                                                         |
| Triclinic, P-1                 | $D_x = 1.376 \text{ Mg m}^{-3}$                         |
| Hall symbol: - P 1             | M                                                       |
| $a = 11.4341 (9) \text{ \AA}$  | Cu $K\alpha$ radiation, $\lambda = 1.54184 \text{ \AA}$ |
| $b = 14.8708 (5) \text{ \AA}$  | Cell parameters from 9552 reflections                   |
| $c = 21.8140 (4) \text{ \AA}$  | $\theta = 4.0\text{--}72.9^\circ$                       |
| $\alpha = 90.044 (2)^\circ$    | $\mu = 4.11 \text{ mm}^{-1}$                            |
| $\beta = 102.445 (5)^\circ$    | $T = 100 \text{ K}$                                     |
| $\gamma = 92.558 (6)^\circ$    | Platelet, yellow                                        |
| $V = 3618.2 (3) \text{ \AA}^3$ | $0.10 \times 0.06 \times 0.02 \text{ mm}$               |
| $Z = 2$                        |                                                         |

### Data collection

|                                                                                               |                                                                        |
|-----------------------------------------------------------------------------------------------|------------------------------------------------------------------------|
| XtaLAB Synergy, Dualflex, HyPix diffractometer                                                | 14028 independent reflections                                          |
| Radiation source: micro-focus sealed X-ray tube, PhotonJet (Cu) X-ray Source                  | 8187 reflections with $I > 2.0\sigma(I)$                               |
| Mirror monochromator                                                                          | $R_{\text{int}} = 0.105$                                               |
| Detector resolution: $10.0000 \text{ pixels mm}^{-1}$                                         | $\theta_{\text{max}} = 74.8^\circ$ , $\theta_{\text{min}} = 3.0^\circ$ |
| $\varphi$ & $\omega$ scans                                                                    | $h = -11 \text{--} 14$                                                 |
| Absorption correction: multi-scan CrysAlisPro 1.171.42.102a (Rigaku Oxford Diffraction, 2023) | $k = -18 \text{--} 18$                                                 |
| $T_{\text{min}} = 0.63$ , $T_{\text{max}} = 0.92$                                             | $l = -26 \text{--} 27$                                                 |
| 43928 measured reflections                                                                    |                                                                        |

### Refinement

|                                 |                                                                                                                       |
|---------------------------------|-----------------------------------------------------------------------------------------------------------------------|
| Refinement on $F^2$             |                                                                                                                       |
| Least-squares matrix: full      | Hydrogen site location: difference Fourier map                                                                        |
| $R[F^2 > 2\sigma(F^2)] = 0.106$ | H-atom parameters not refined                                                                                         |
| $wR(F^2) = 0.313$               | Method = Modified Sheldrick $w = 1/[\sigma^2(F^2) + (0.19P)^2 + 81.22P]$ ,<br>where $P = (\max(F_o^2, 0) + 2F_c^2)/3$ |
| $S = 0.79$                      | $(\Delta/\sigma)_{\text{max}} = 0.0003$                                                                               |
| 12287 reflections               | $\Delta\rho_{\text{max}} = 4.68 \text{ e \AA}^{-3}$                                                                   |
| 848 parameters                  | $\Delta\rho_{\text{min}} = -2.10 \text{ e \AA}^{-3}$                                                                  |
| 14 restraints                   | Extinction correction: None                                                                                           |

## 5. Electrochemistry

Voltammetric measurements were carried out with a potentiostat Autolab PGSTAT100. Experiments were performed at room temperature in a homemade airtight three-electrode cell connected to a vacuum/argon line. The reference electrode was a saturated calomel electrode (SCE) separated from the solution by a bridge compartment. The counter electrode was a platinum wire of 1 cm<sup>2</sup> apparent surface. The working electrode was a glassy carbon disk (1 mm diameter). The supporting electrolyte (nBu<sub>4</sub>N)[PF<sub>6</sub>] (Supelco, 99% puriss electrochemical grade) was dried and degassed under argon prior to use. THF (HPLC grade) was dried by passing through an activated alumina column under argon prior to use. The solutions used during the electrochemical studies were typically 0.1 M in supporting electrolyte and 10<sup>-3</sup> mol·L<sup>-1</sup> in analyte. Parameters for square wave voltammetry: modulation amplitude 20 mV, frequency 20 Hz, step potential 5 mV or 0.1 V/s. Before each measurement, the solutions were degassed by bubbling Ar and the working electrode was polished with a polishing machine (Presi P230). In these conditions, the half-wave potential of ferrocene is :  $E_{1/2}(\text{Fc}^+/\text{Fc}) = 0.550 \text{ V vs. SCE}$ .

### 5.1. Ligand L<sup>CF<sub>3</sub></sup>

#### 5.1.1. Cyclic Voltammetry

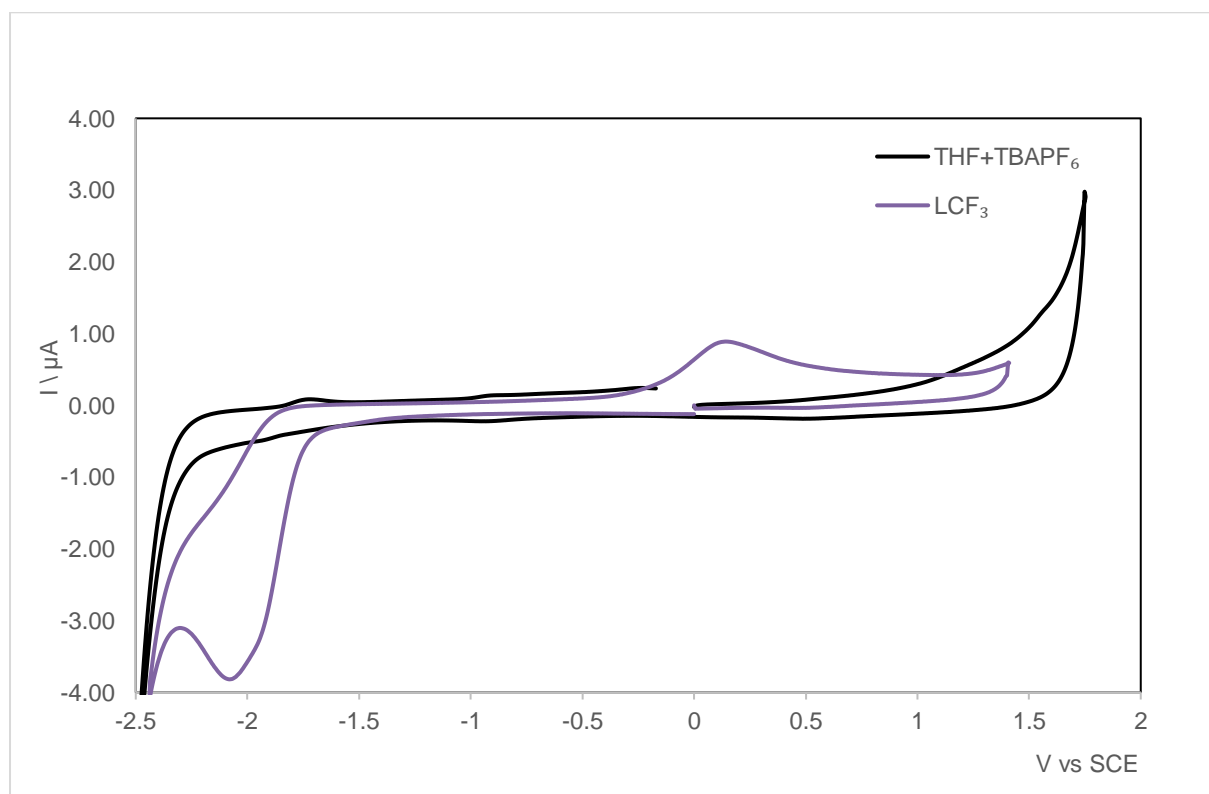

**Figure S63.** Cyclic voltammogram of L<sup>CF<sub>3</sub></sup> in THF (0.10 M TBAPF<sub>6</sub>, GC working electrode), scan rate 0.2 V/s, room temperature, initial scan: OCP going from about cathodic potential.

### 5.1.2. Square wave Voltammetry

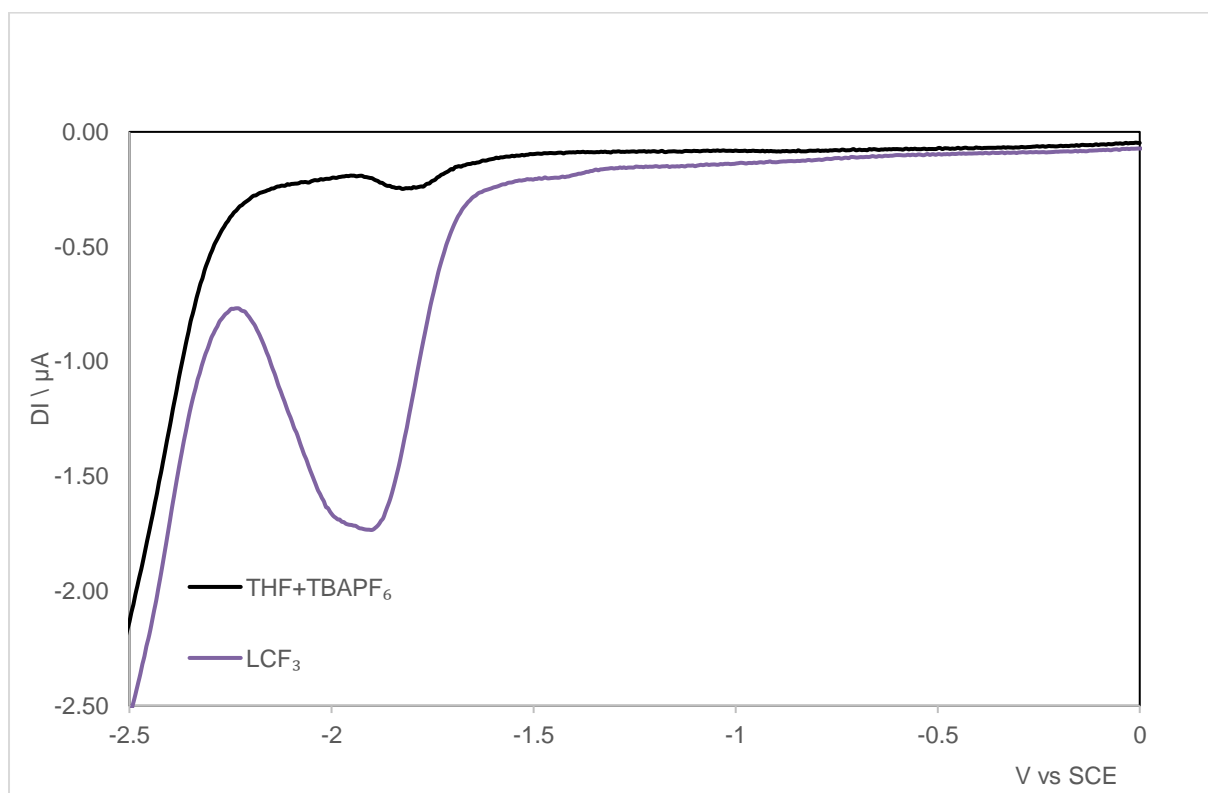

**Figure S64.** Cathodic square wave voltammogram (0.1 M TBA[PF<sub>6</sub>] / THF,  $\nu = 0.1$  V/s, r.t.) of L<sup>CF<sub>3</sub></sup>.

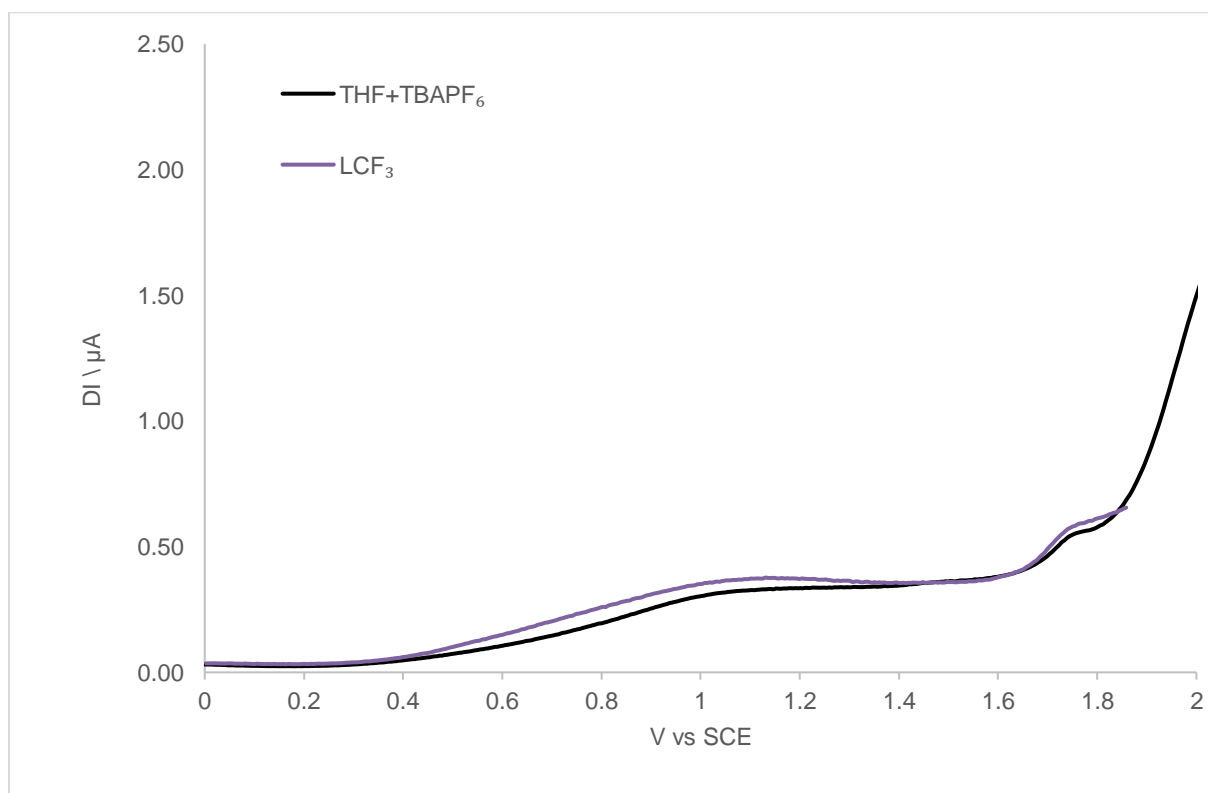

**Figure S65.** Anodic square wave voltammogram (0.1 M TBA[PF<sub>6</sub>] / THF,  $\nu = 0.1$  V/s, r.t.) of L<sup>CF<sub>3</sub></sup>.

## 5.2. Ligand $L^{tBu}$

### 5.2.1. Cyclic voltammetry

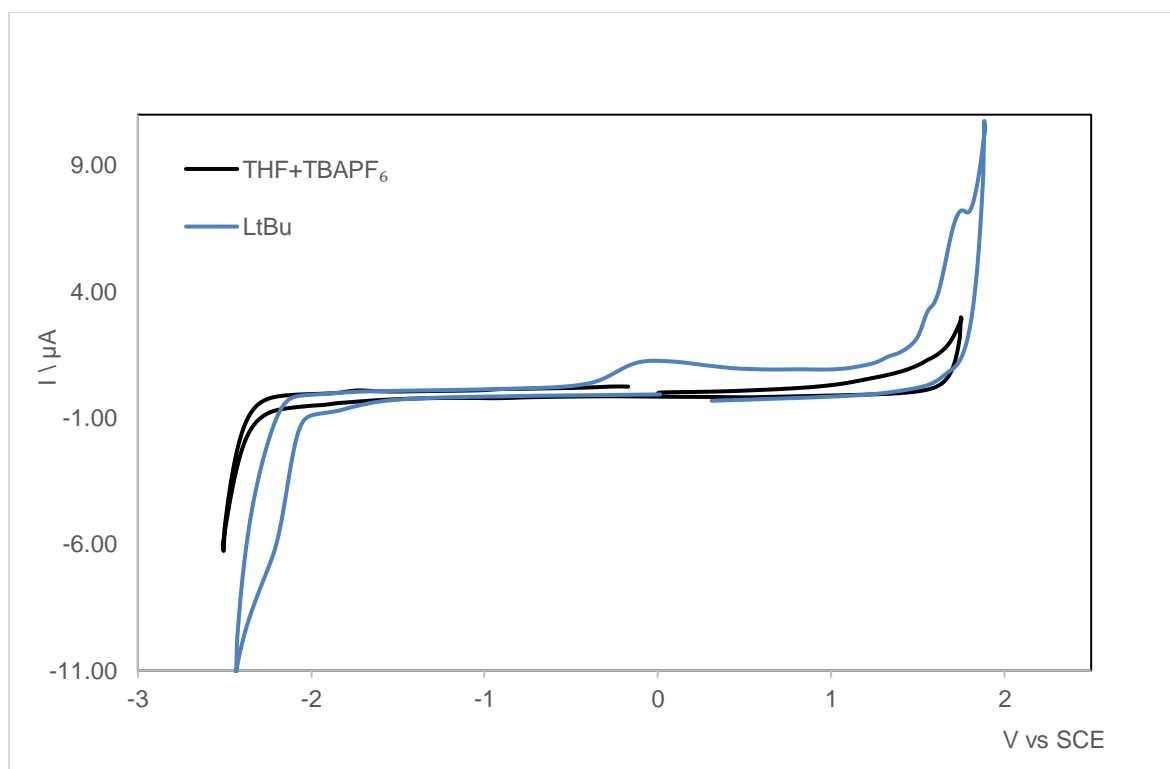

**Figure S66.** Cyclic voltammogram of  $L^{tBu}$  in THF (0.10 M TBA[PF<sub>6</sub>], GC working electrode), scan rate 0.2 V/s, room temperature, initial scan: OCP going from about cathodic potential..

### 5.2.2. Square wave voltammetry

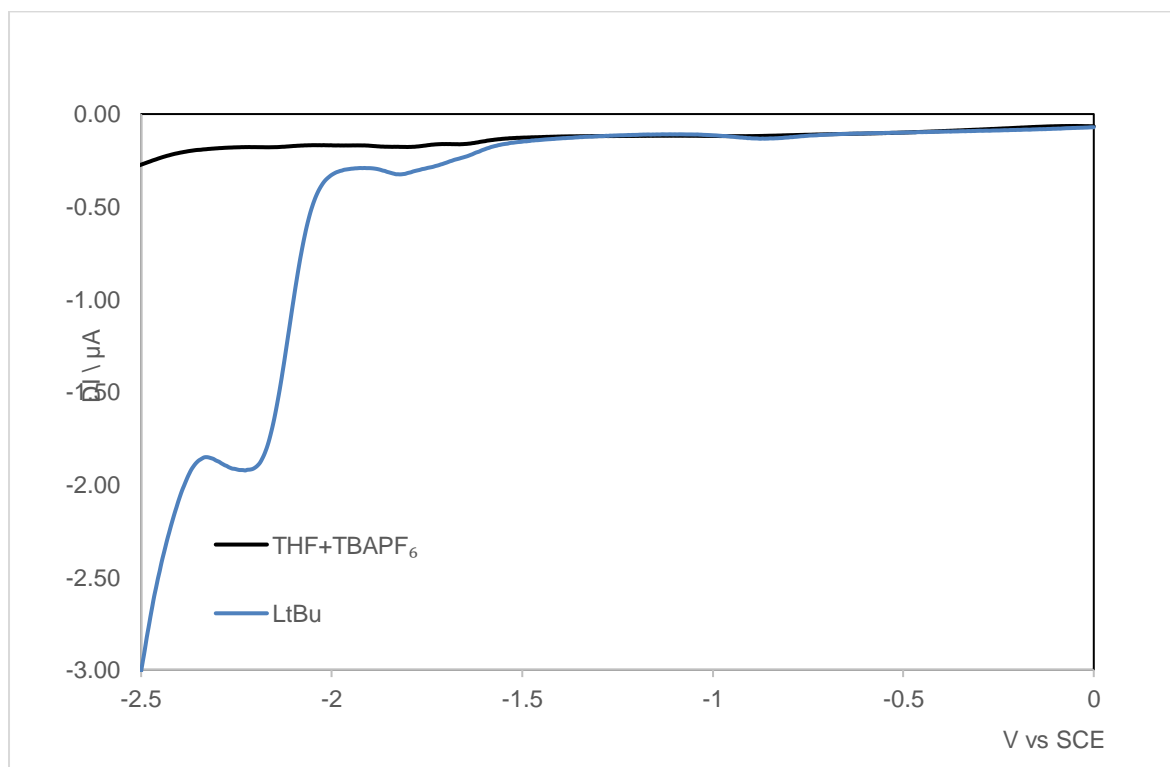

**Figure S67.** Cathodic square wave voltammogram (0.1 M TBA[PF<sub>6</sub>] / THF,  $\nu = 0.1$  V/s, r.t.) of  $L^{tBu}$ .

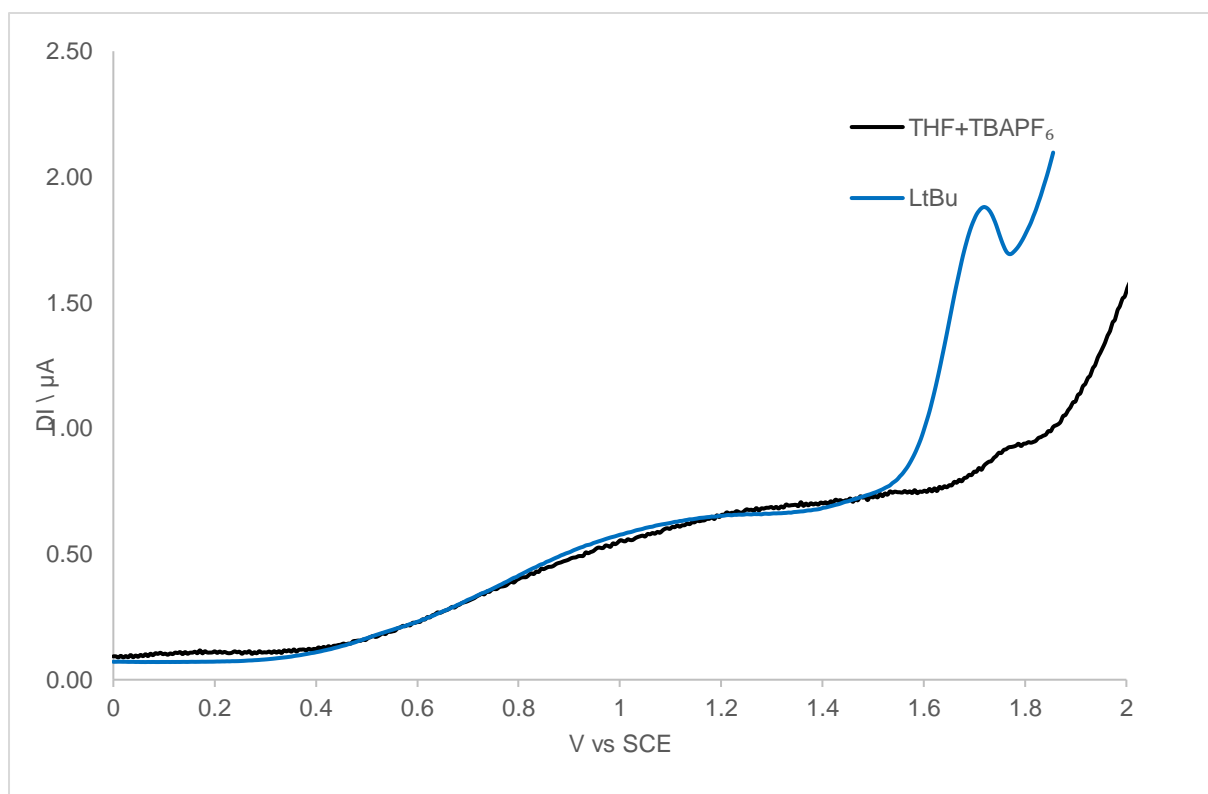

**Figure S68.** Anodic square wave voltammogram (0.1 M TBA[PF<sub>6</sub>] / THF,  $\nu = 0.1$  V/s, r.t.) of **L<sup>t</sup>Bu**.

### 5.3. Compound 4a

#### 5.3.1. Cyclic Voltammetry

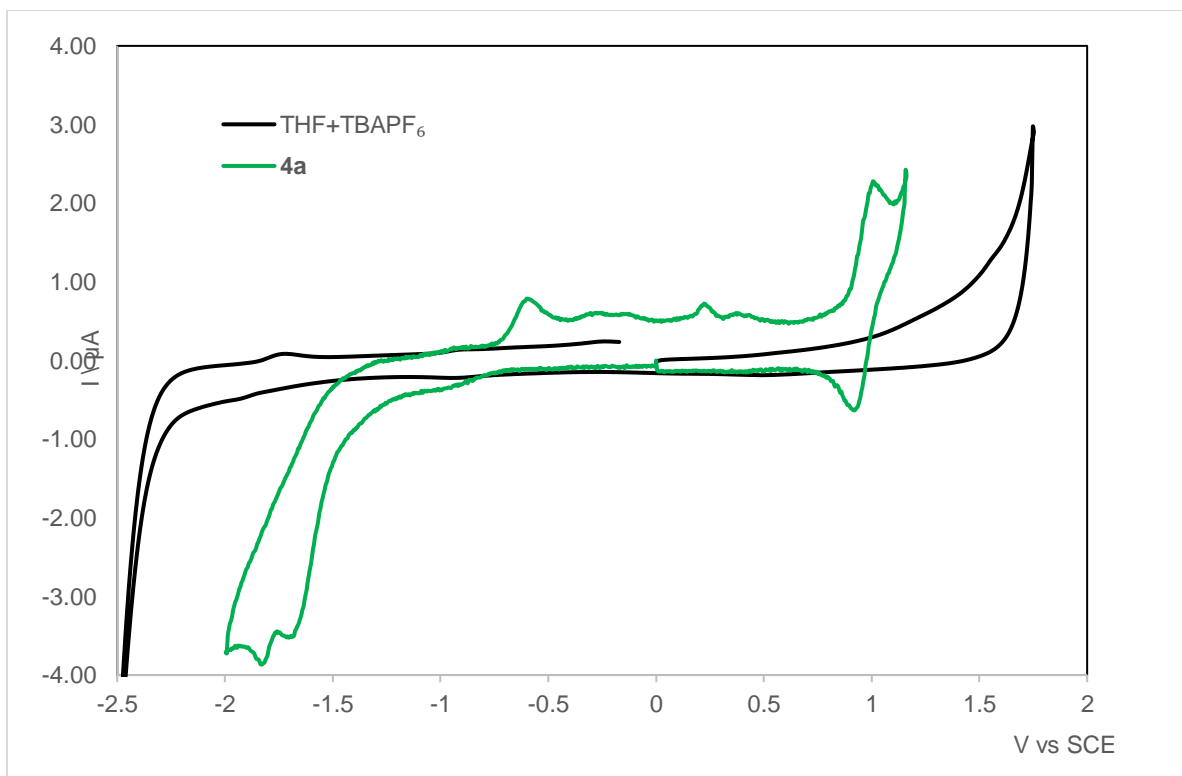

**Figure S69.** Cyclic voltammogram of **4a** in THF (0.10 M TBAPF<sub>6</sub>, GC working electrode), scan rate 0.2 V/s, room temperature, initial scan: OCP going from about cathodic potential.

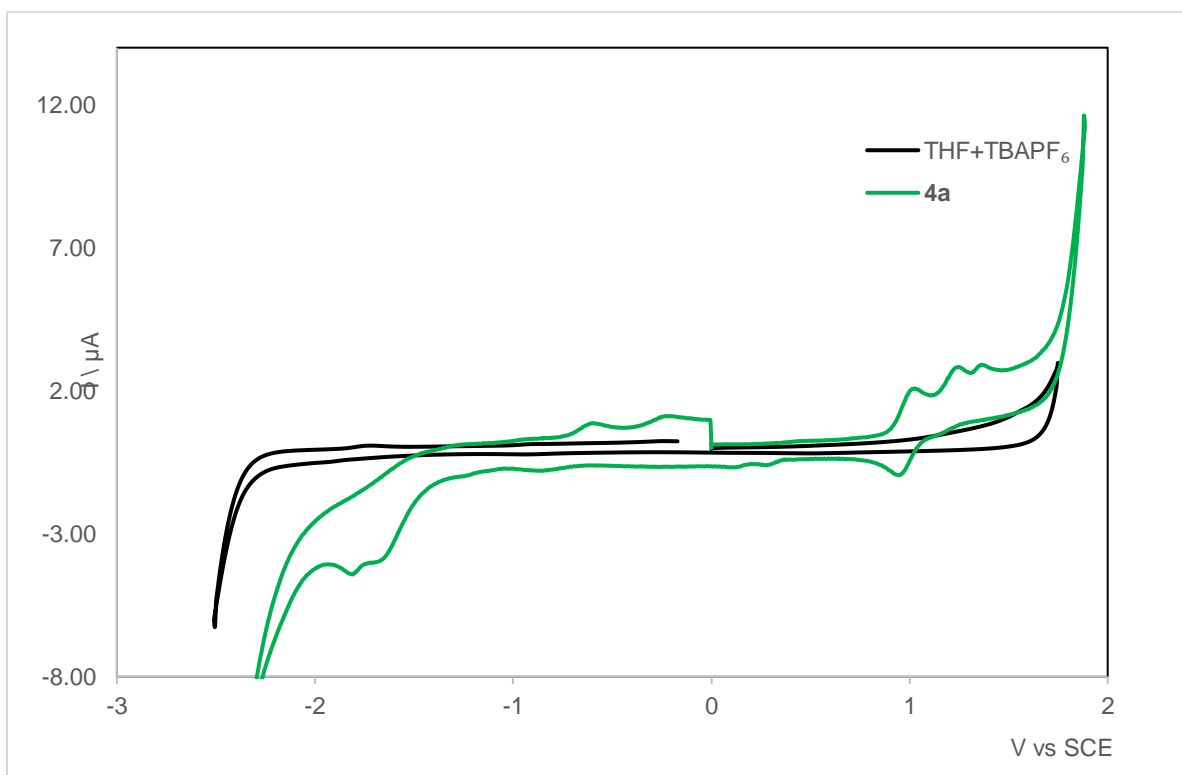

**Figure S70.** Cyclic voltammogram of **4a** in THF (0.10 M TBAPF<sub>6</sub>, GC working electrode), scan rate 0.2 V/s, room temperature, initial scan: OCP going from about anodic potential.



### 5.3.2. Square wave voltammetry

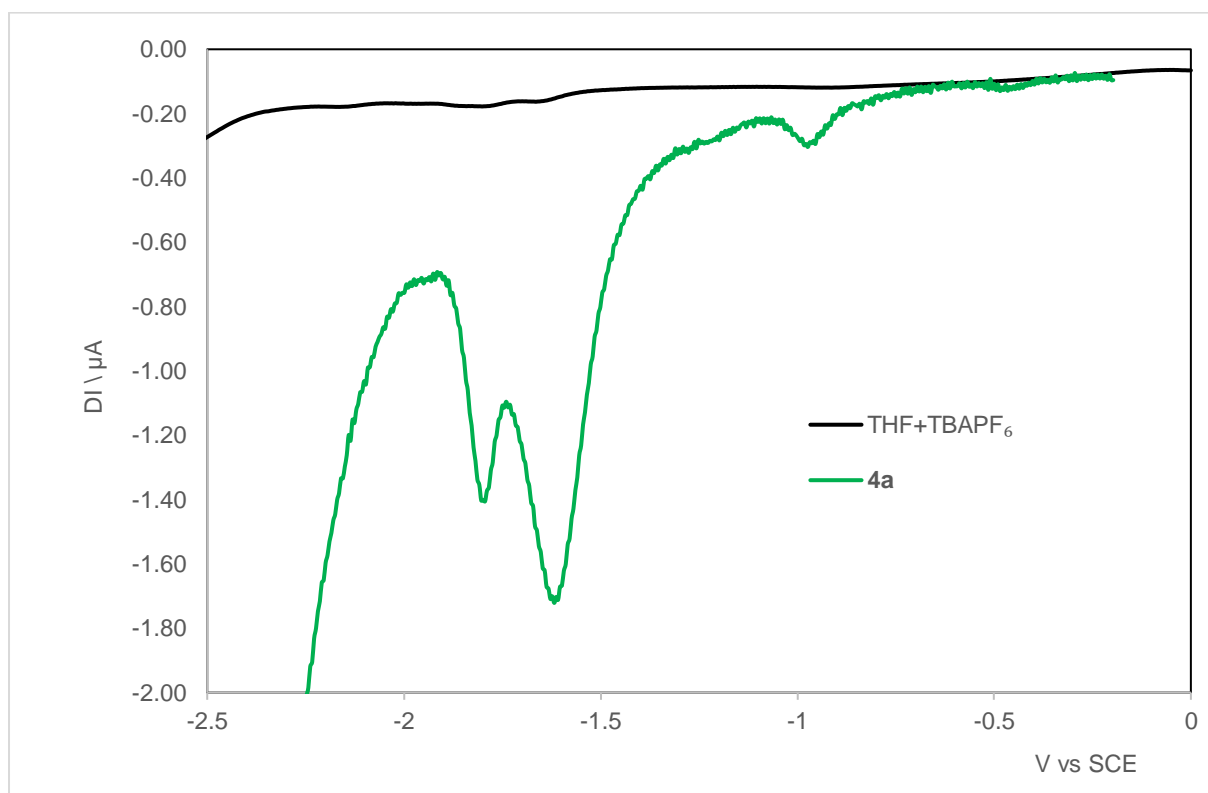

**Figure S71.** Cathodic square wave voltammogram (0.1 M TBA[PF<sub>6</sub>] / THF,  $\nu = 0.1$  V/s, r.t.) of **4a**.

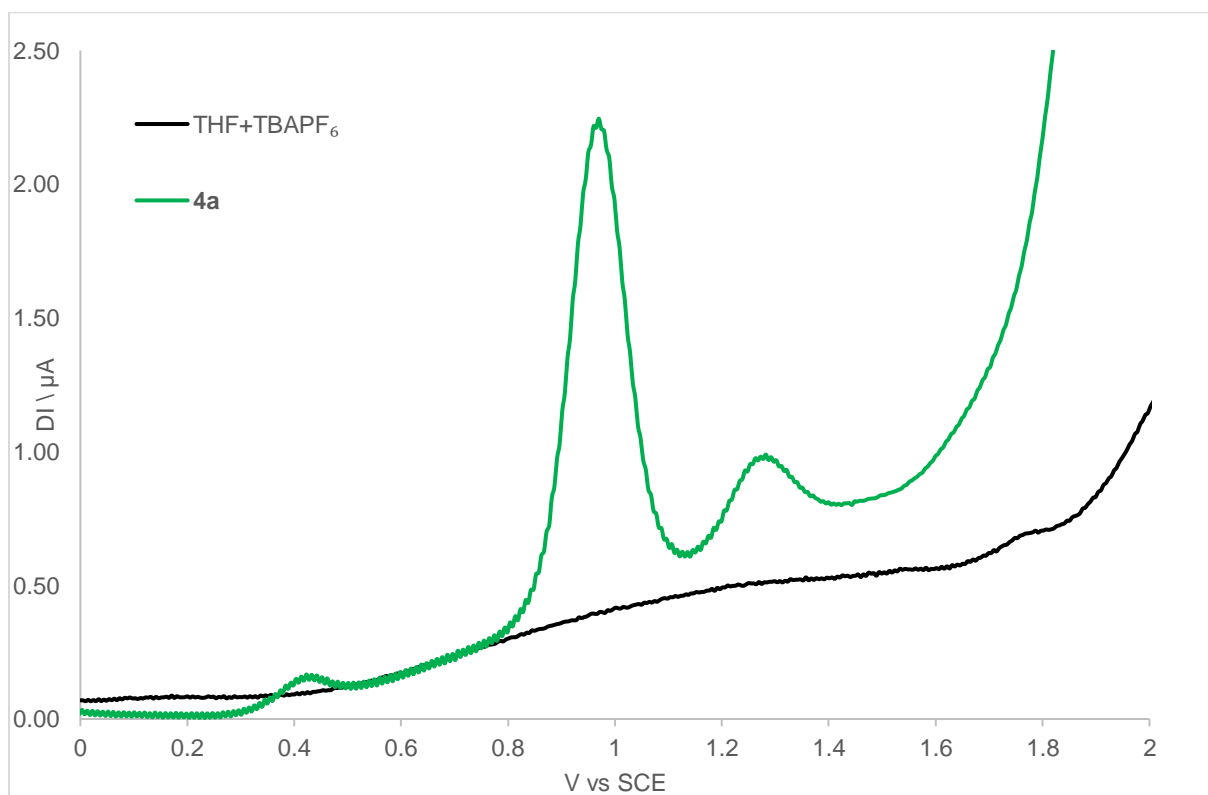

**Figure S72.** Anodic square wave voltammogram (0.1 M TBA[PF<sub>6</sub>] / THF,  $\nu = 0.1$  V/s, r.t.) of **4a**.

## 5.4. Compound 4b

### 5.4.1. Cyclic Voltammetry

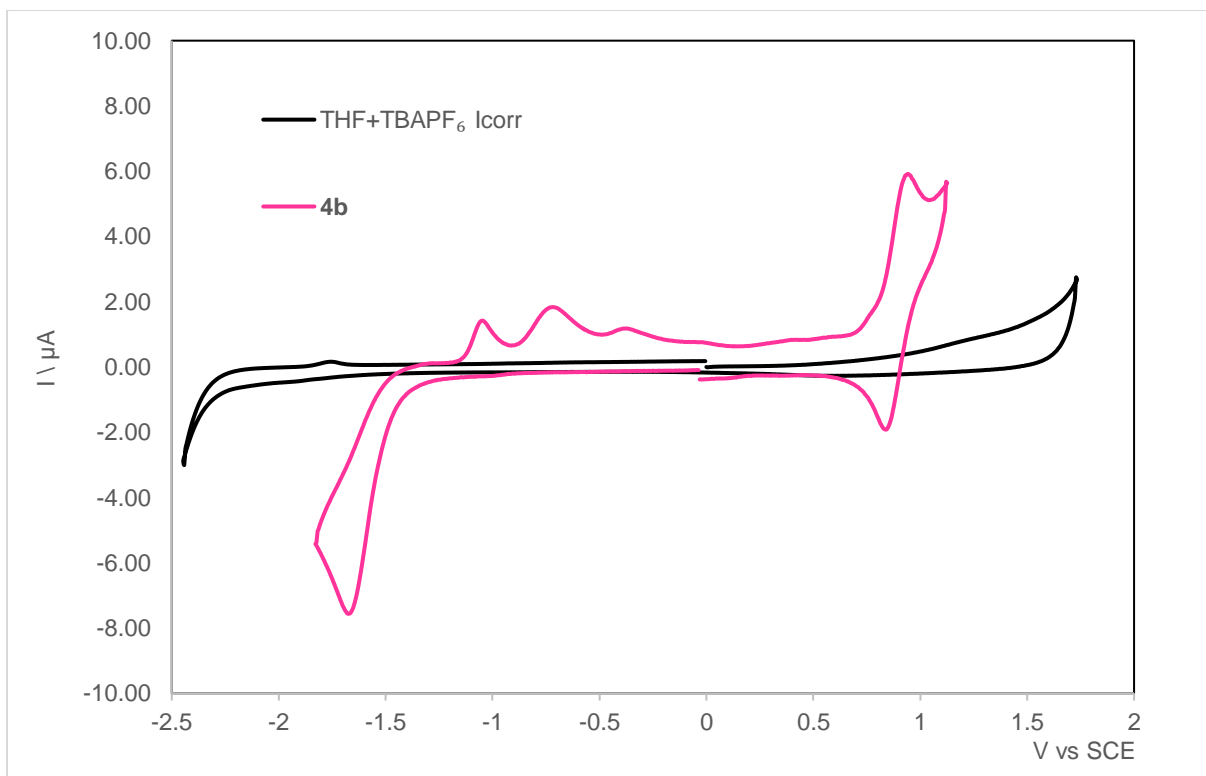

**Figure S73.** Cyclic voltammogram of **4b** in THF (0.10 M TBAPF<sub>6</sub>, GC working electrode), scan rate 0.2 V/s, room temperature, initial scan: OCP going from about cathodic potential.

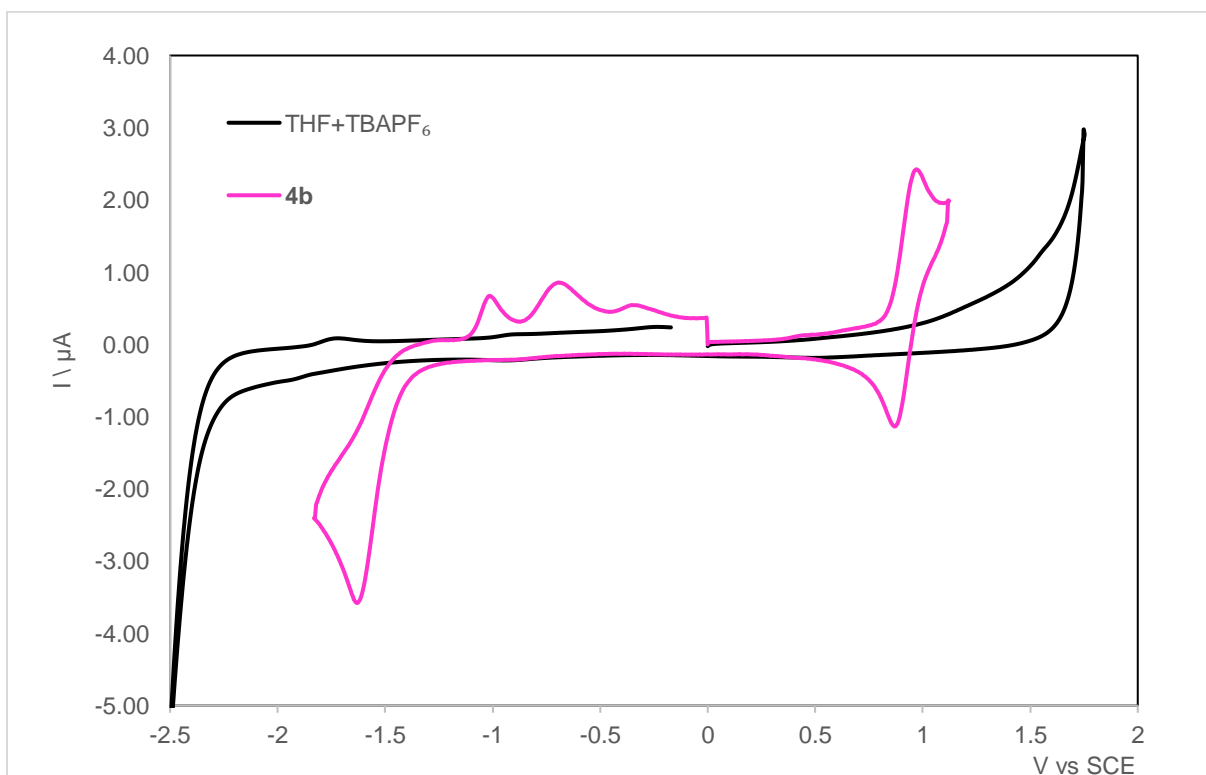

**Figure S74.** Cyclic voltammogram of **4b** in THF (0.10 M TBAPF<sub>6</sub>, GC working electrode), scan rate 0.2 V/s, room temperature, initial scan: OCP going from about anodic potential.

### 5.4.2. Square wave voltammetry

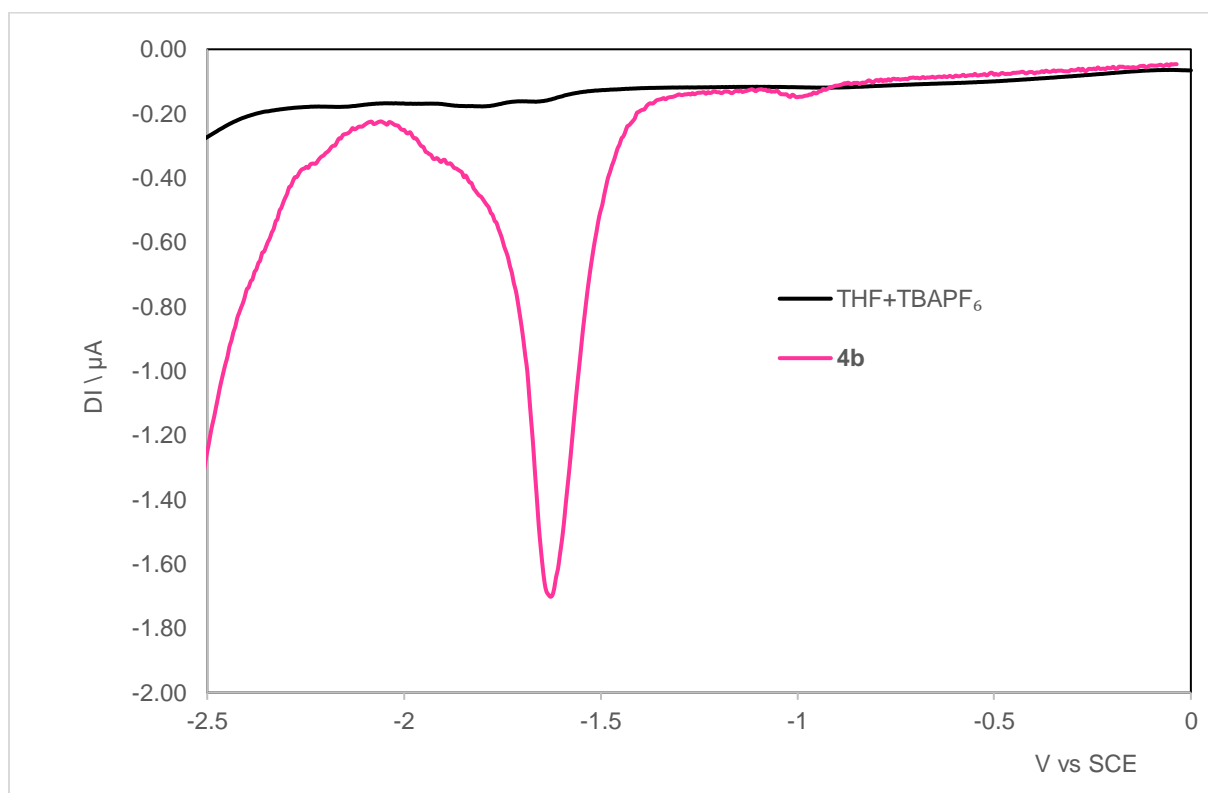

**Figure S75.** Cathodic square wave voltammogram (0.1 M TBA[PF<sub>6</sub>] / THF,  $\nu = 0.1$  V/s, r.t.) of **4b**.

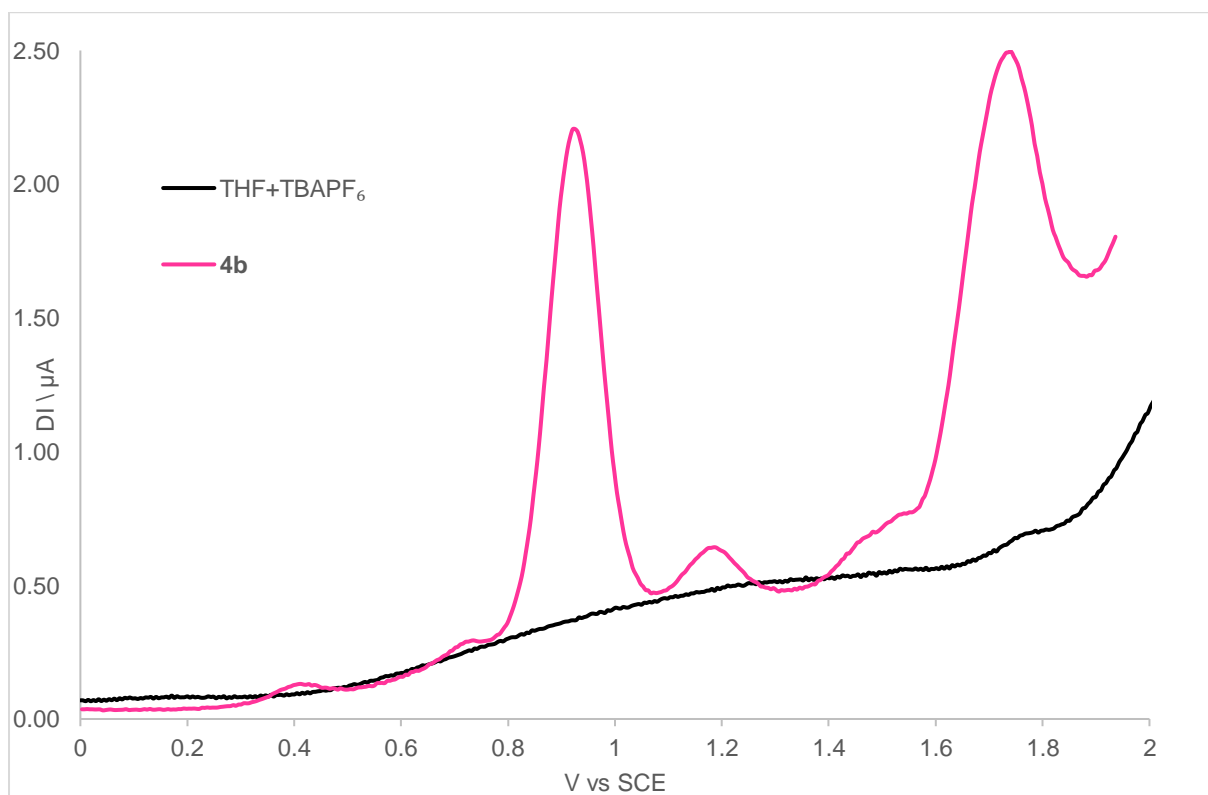

**Figure S76.** Anodic square wave voltammogram (0.1 M TBA[PF<sub>6</sub>] / THF,  $\nu = 0.1$  V/s, r.t.) of **4b**.

## 5.5. Compound 5b

### 5.5.1. Cyclic voltammetry

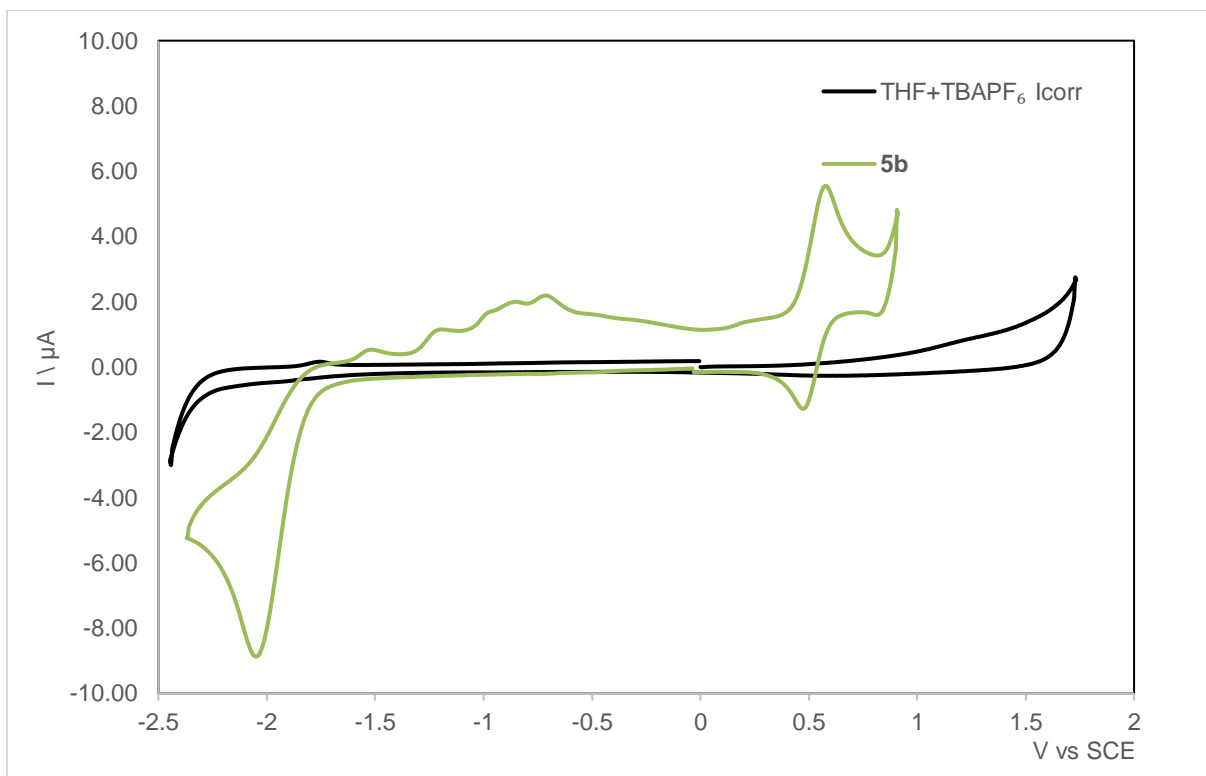

**Figure S77.** Cyclic voltammogram of **5b** in THF (0.10 M TBAPF<sub>6</sub>, GC working electrode), scan rate 0.2 V/s, room temperature, initial scan: OCP going from about cathodic potential.

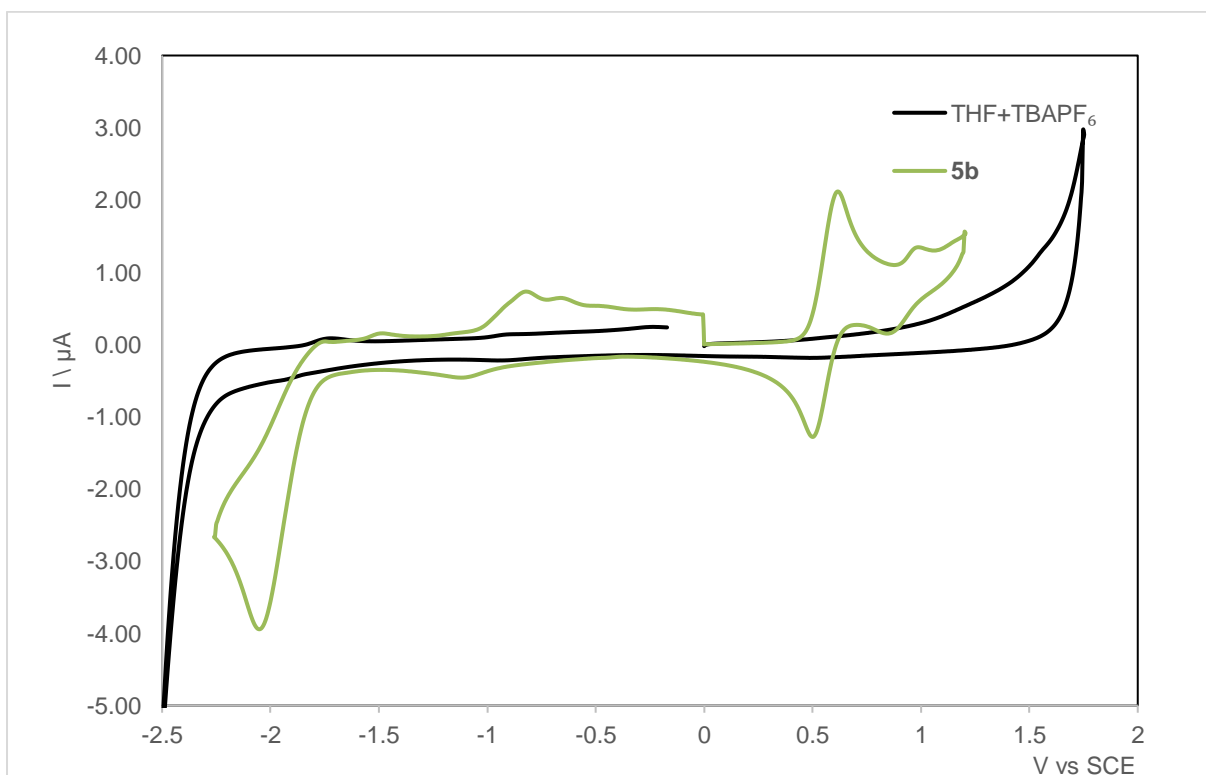

**Figure S78.** Cyclic voltammogram of **5b** in THF (0.10 M TBAPF<sub>6</sub>, GC working electrode), scan rate 0.2 V/s, room temperature, initial scan: OCP going from about anodic potential.

### 5.5.2. Square wave voltammetry

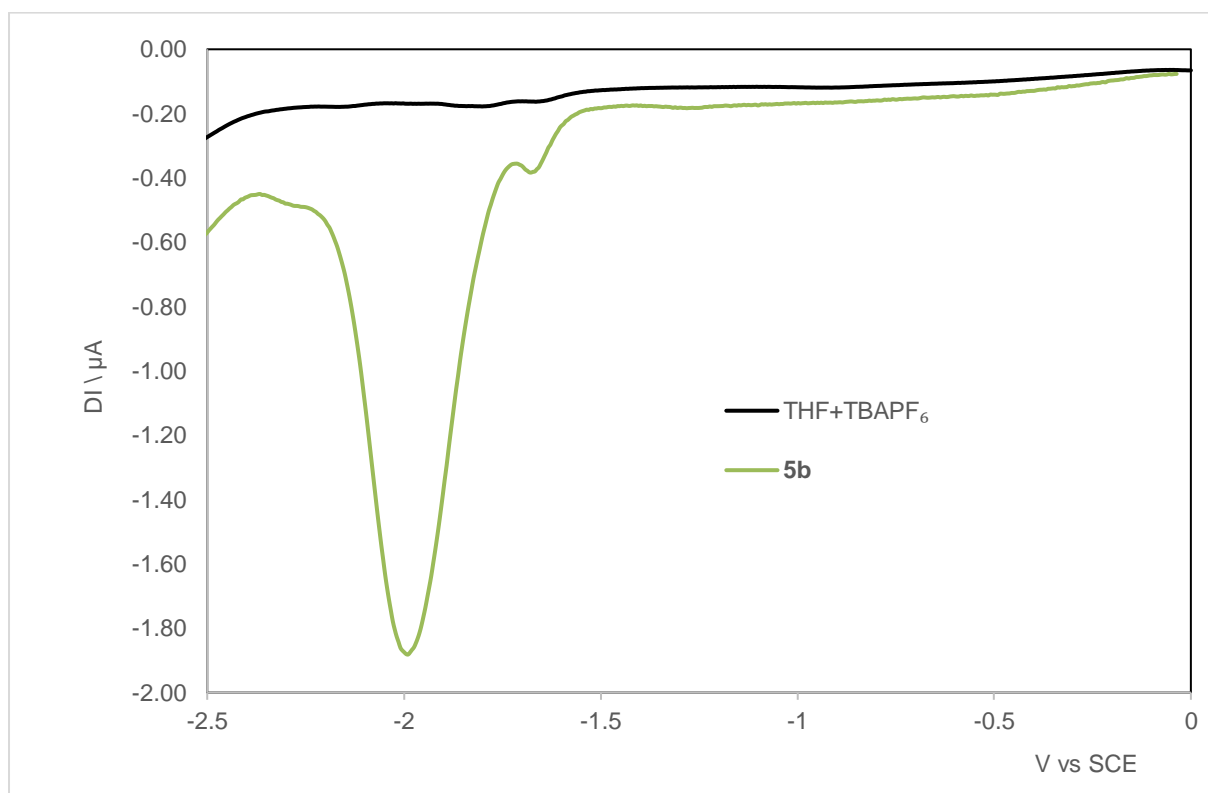

**Figure S79.** Cathodic square wave voltammogram (0.1 M TBA[PF<sub>6</sub>] / THF,  $\nu = 0.1$  V/s, r.t.) of **5b**.

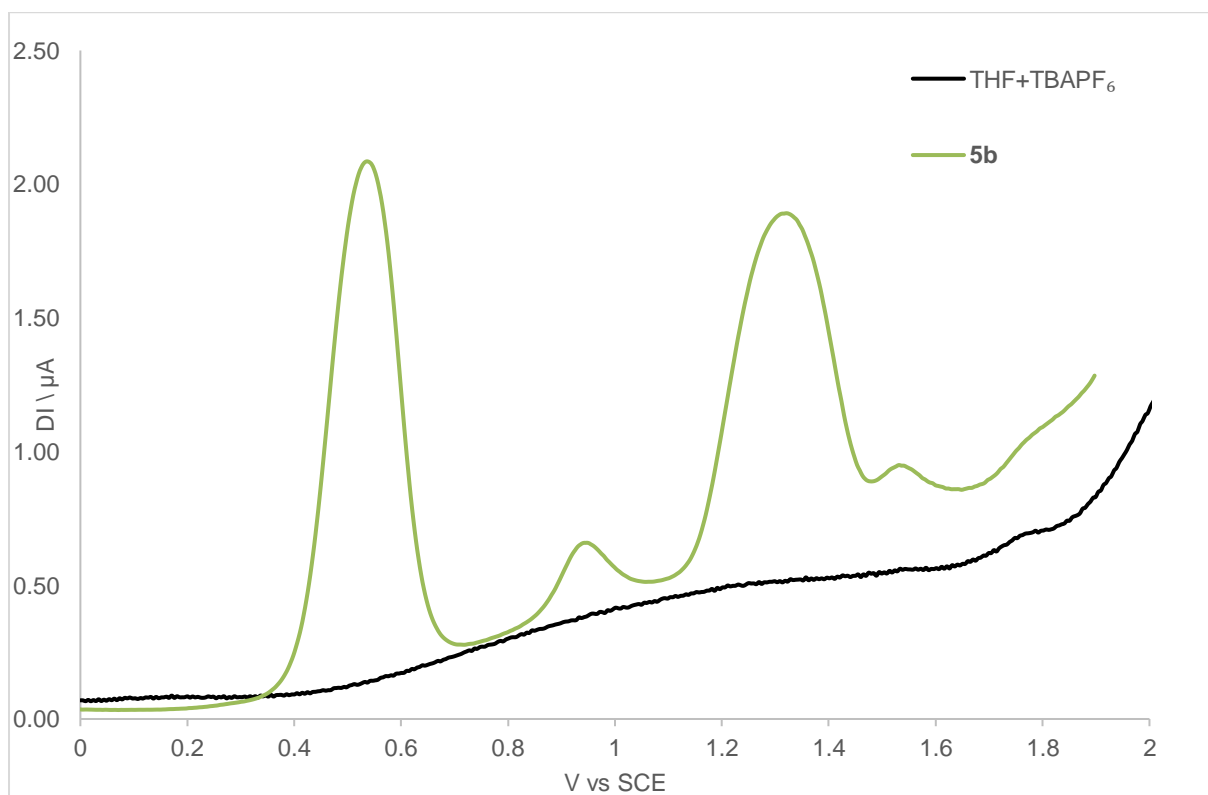

**Figure S80.** Anodic square wave voltammogram (0.1 M TBA[PF<sub>6</sub>] / THF,  $\nu = 0.1$  V/s, r.t.) of **5b**.

## 5.6. Compound 6b

### 5.6.1. Cyclic voltammetry

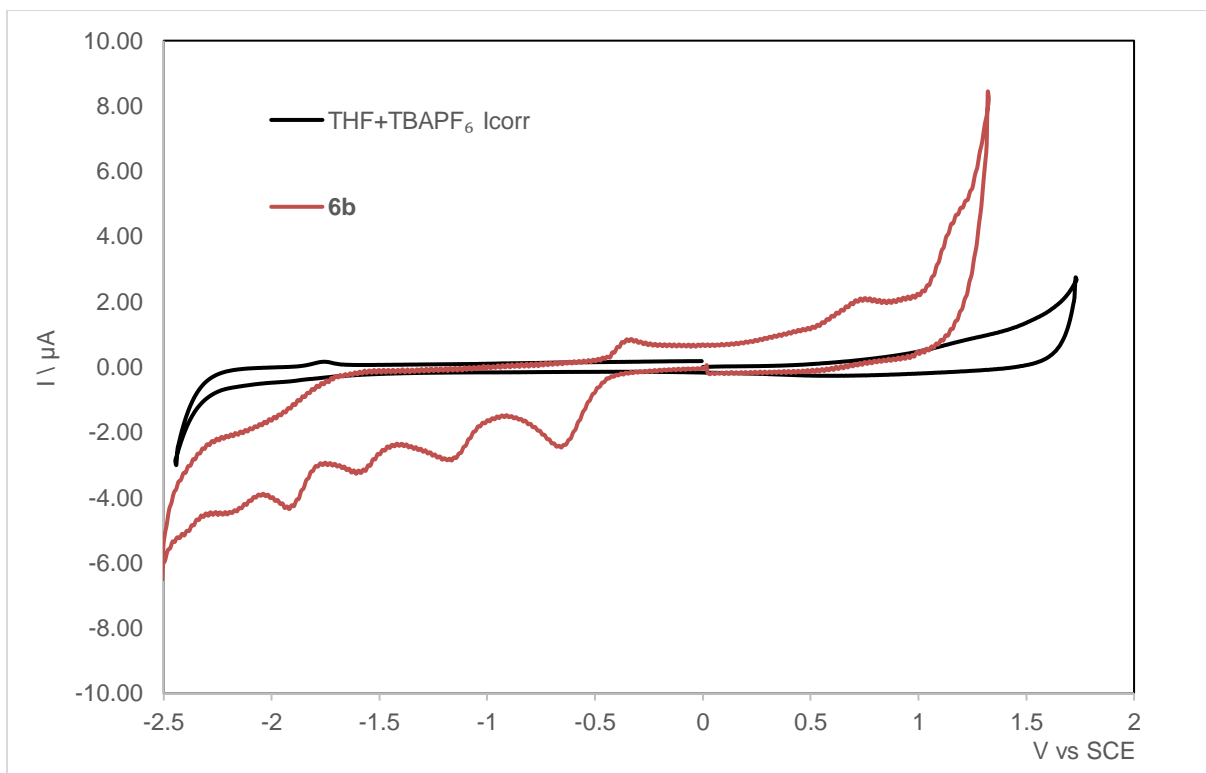

**Figure S81.** Cyclic voltammogram of **6b** in THF (0.10 M TBAPF<sub>6</sub>, GC working electrode), scan rate 0.2 V/s, room temperature, initial scan: OCP going from about cathodic potential.

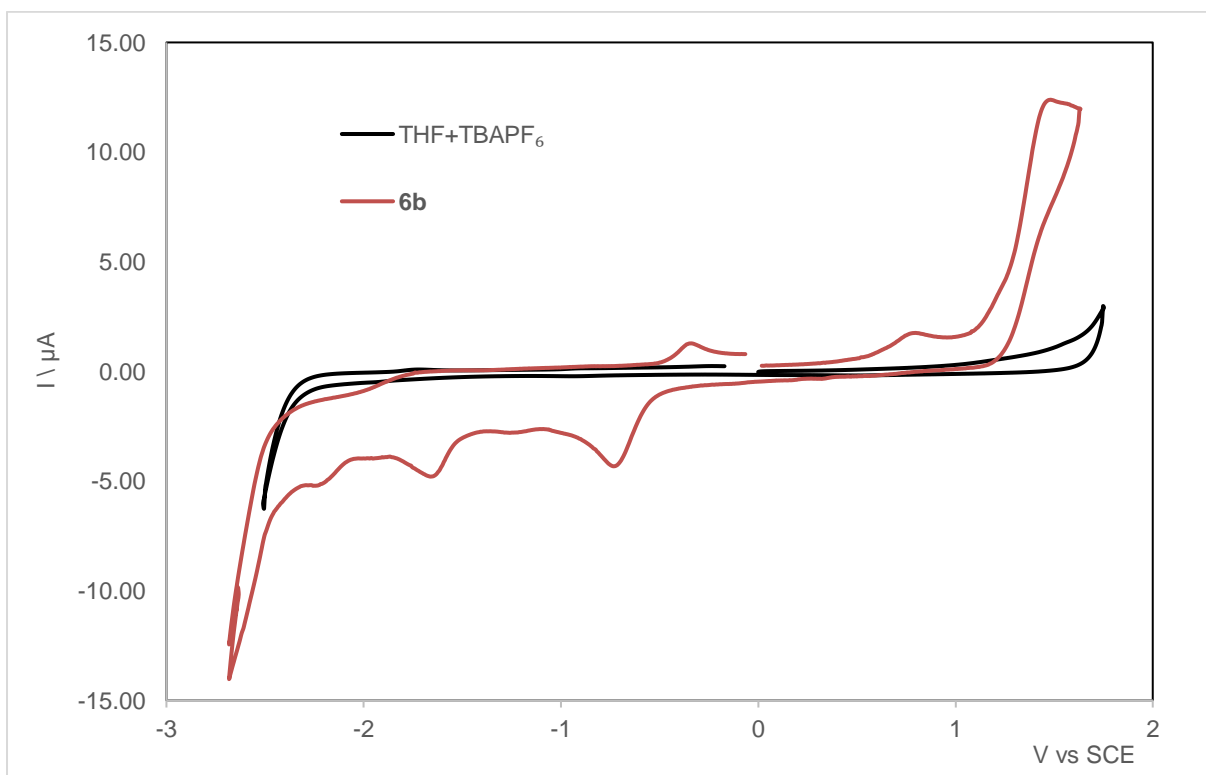

**Figure S82.** Cyclic voltammogram of **6b** in THF (0.10 M TBAPF<sub>6</sub>, GC working electrode), scan rate 0.2 V/s, room temperature, initial scan: OCP going from about anodic potential.

### 5.6.2. Square wave voltammetry

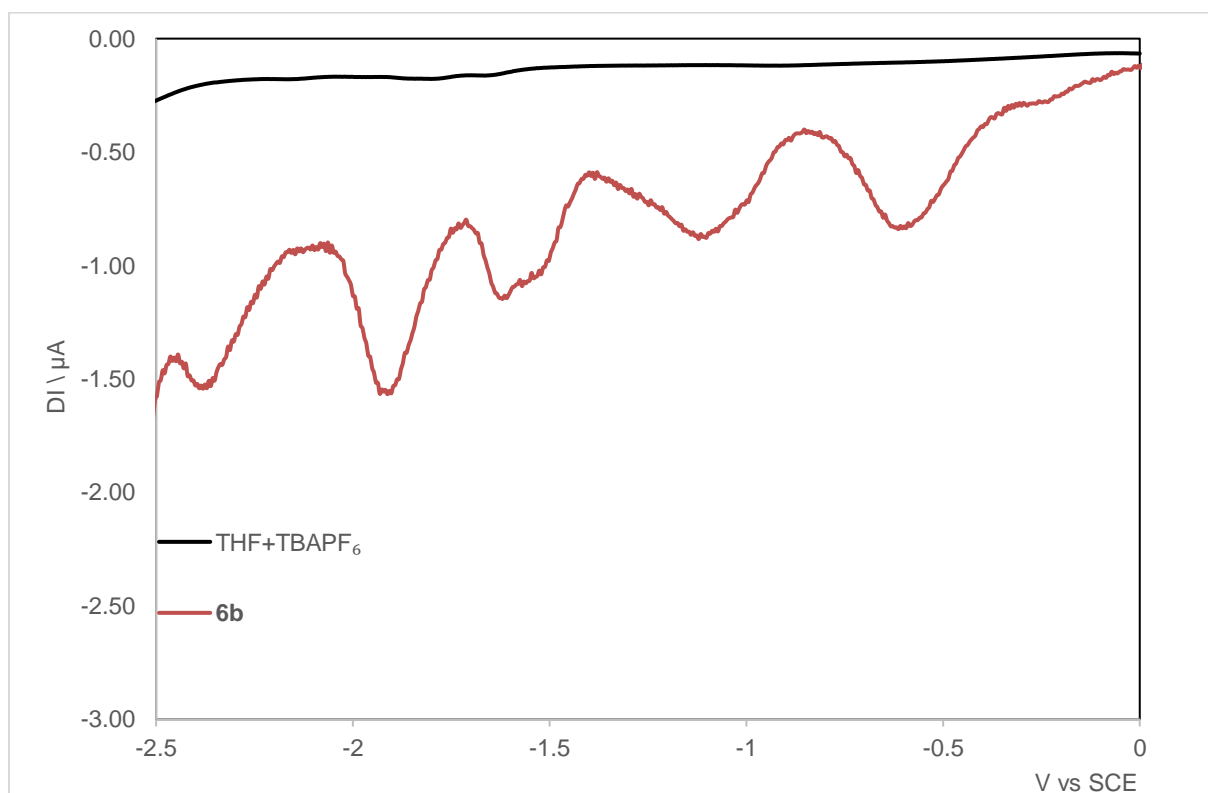

**Figure S83.** Square wave voltammetry of **6b**, sweeping cathodic potentials.

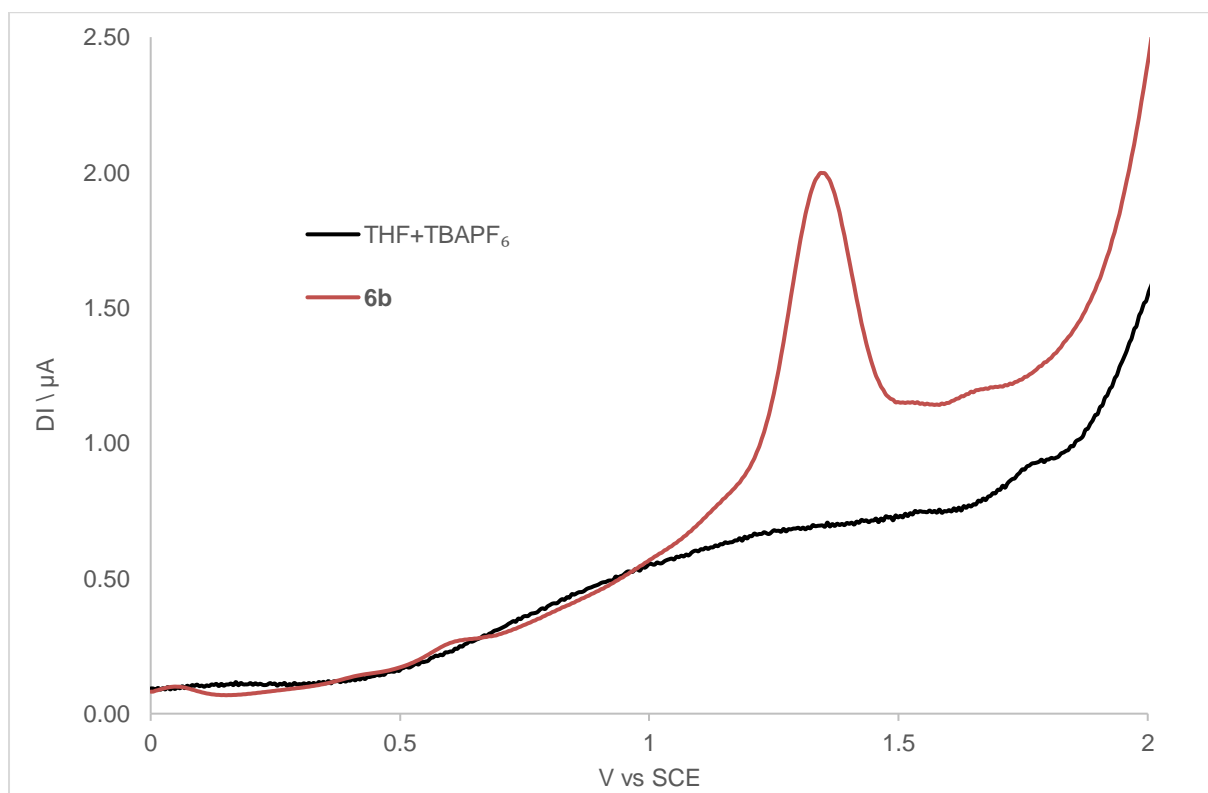

**Figure S84.** Square wave voltammetry of **6b**, sweeping anodic potentials.

**5.7. Table S1 – Compilation of redox potentials (V vs. SCE) determined by cyclic voltammetry.**

|                             | Oxidation                                |                   |                   |                    | Reduction          |                    |                    |                    |                    |       |                    |                     |
|-----------------------------|------------------------------------------|-------------------|-------------------|--------------------|--------------------|--------------------|--------------------|--------------------|--------------------|-------|--------------------|---------------------|
|                             | I                                        | II                | III               | L <sup>+ / 0</sup> | I                  | II                 | III                | IV                 | V                  | VI    | L <sup>0 / -</sup> | L <sup>- / 2-</sup> |
| L <sup>CF<sub>3</sub></sup> |                                          |                   |                   |                    |                    |                    |                    |                    |                    |       | -1.87 <sup>a</sup> | -2.00 <sup>a</sup>  |
| L <sup>tBu</sup>            |                                          |                   |                   | 1.73 <sup>a</sup>  |                    |                    |                    |                    |                    |       | -2.16 <sup>a</sup> |                     |
| <b>4a</b>                   | 0.97 <sup>b</sup><br>(64 <sup>c</sup> )  | 1.27 <sup>a</sup> | 1.39 <sup>a</sup> | -                  |                    |                    |                    | -1.61 <sup>a</sup> | -1.80 <sup>a</sup> |       |                    |                     |
| <b>4b</b>                   | 0.92 <sup>b</sup><br>(78 <sup>c</sup> )  | 1.19 <sup>a</sup> | 1.49 <sup>a</sup> | 1.83 <sup>a</sup>  |                    |                    |                    | -1.59 <sup>a</sup> |                    |       |                    |                     |
| <b>5b</b>                   | 0.56 <sup>b</sup><br>(107 <sup>c</sup> ) | 0.94 <sup>b</sup> | 1.44 <sup>a</sup> |                    |                    |                    | -1.64 <sup>a</sup> | -2.00 <sup>a</sup> |                    |       |                    |                     |
| <b>6b</b>                   |                                          |                   | 1.45 <sup>a</sup> |                    | -0.68 <sup>a</sup> | -1.17 <sup>a</sup> | -1.56 <sup>a</sup> | -1.91 <sup>a</sup> |                    | -2.38 |                    |                     |

<sup>a</sup> irreversible waves,  $E_p$ . <sup>b</sup> quasi-reversible waves,  $E_{1/2}$ . <sup>c</sup> peak-to-peak separation,  $\Delta E_p$  in mV.

**5.8. Table S2 – Compilation of redox potentials (V vs. SCE) determined by square wave voltammetry.**

|                             | Oxidation |      |      |                    | Reduction |       |       |       |       |       |                    |                     |
|-----------------------------|-----------|------|------|--------------------|-----------|-------|-------|-------|-------|-------|--------------------|---------------------|
|                             | I         | II   | III  | L <sup>+ / 0</sup> | I         | II    | III   | IV    | V     | VI    | L <sup>0 / -</sup> | L <sup>- / 2-</sup> |
| L <sup>CF<sub>3</sub></sup> |           |      |      |                    |           |       |       |       |       |       | -1.88              | -2.00               |
| L <sup>tBu</sup>            |           |      |      | 1.72               |           |       |       |       |       |       | -2.18              |                     |
| <b>4a</b>                   | 0.97      | 1.28 | 1.88 | -                  |           |       |       | -1.61 | -1.81 |       |                    |                     |
| <b>4b</b>                   | 0.92      | 1.18 | 1.73 | 1.73               |           |       |       | -1.59 |       |       |                    |                     |
| <b>5b</b>                   | 0.54      | 0.94 | 1.31 |                    |           |       | -1.64 | -1.99 |       |       |                    |                     |
| <b>6b</b>                   |           |      | 1.36 |                    | -0.68     | -1.17 | -1.56 | -1.91 |       | -2.38 |                    |                     |



## 6. References

- (1) Sheldrick, G. M. Crystal Structure Refinement with SHELXL. *Acta Cryst C* **2015**, *71* (1), 3–8. <https://doi.org/10.1107/S2053229614024218>.
- (2) Farrugia, L. J. WinGX Suite for Small-Molecule Single-Crystal Crystallography. *J Appl Crystallogr* **1999**, *32* (4), 837–838. <https://doi.org/10.1107/S0021889899006020>.
- (3) Betteridge, P. W.; Carruthers, J. R.; Cooper, R. I.; Prout, K.; Watkin, D. J. CRYSTALS Version 12: Software for Guided Crystal Structure Analysis. *J Appl Crystallogr* **2003**, *36* (6), 1487–1487. <https://doi.org/10.1107/S0021889803021800>.
- (4) Schmitz, W. International Tables for X-Ray Crystallography, Vol. IV (Ergänzungsband). Herausgegeben von Der International Union of Crystallography. The Kynoch Press, Birmingham, England, 1974, 366 Seiten Einschließlich Tabellen Und Sachwortverzeichnis. *Kristall und Technik* **1975**, *10* (11), K120–K120. <https://doi.org/10.1002/crat.19750101116>.
- (5) Van Der Sluis, P.; Spek, A. L. BYPASS: An Effective Method for the Refinement of Crystal Structures Containing Disordered Solvent Regions. *Acta Crystallographica Section A* **1990**, *46* (3), 194–201. <https://doi.org/10.1107/S0108767389011189>.
- (6) Macrae, C. F.; Sovago, I.; Cottrell, S. J.; Galek, P. T. A.; McCabe, P.; Pidcock, E.; Platings, M.; Shields, G. P.; Stevens, J. S.; Towler, M.; Wood, P. A. Mercury 4.0: From Visualization to Analysis, Design 72 and Prediction. *J Appl Crystallogr* **2020**, *53* (Pt 1), 226235. <https://doi.org/10.1107/S1600576719014092>.
